# Supplementary material
Source: publisher figshare collection journal article supplement (https://acs.figshare.com/ndownloader/files/5143246)
Supplement: Supplementary file 1 [file 5143246]

# Supporting Information for

## Competition Between Alkenes in the Intramolecular Ketene–Alkene [2+2]–Cycloaddition: What Does It Take to Win?

*Guillaume Bélanger,\* François Lévesque, Julie Pâquet and Guillaume Barbe*

Laboratoire de synthèse organique et de développement de stratégies de synthèse

Département de Chimie, Université de Sherbrooke

2500 boulevard Université, Sherbrooke, Québec, J1K 2R1, Canada

### CONTENTS :

|            |                                                                                                                       |     |
|------------|-----------------------------------------------------------------------------------------------------------------------|-----|
| <i>I</i>   | <i>General Information</i> .....                                                                                      | S2  |
| <i>II</i>  | <i>Procedures and Spectroscopic Data of Compounds 2, 7, 8, 10, 11, 15, 20, 22–25</i> .....                            | S2  |
| <i>III</i> | <i><sup>1</sup>H and <sup>13</sup>C-NMR Spectra of Compounds 2, 5, 7, 8, 10, 11, 14, 16, 17, 19, 20, 22b–25</i> ..... | S16 |
| <i>IV</i>  | <i>COSY, NOESY, TOCSY, HSQC and HMBC Spectra of Compounds 19</i> .....                                                | S42 |
| <i>V</i>   | <i>Proof of Structure of Compound 19</i> .....                                                                        | S45 |
| <i>VI</i>  | <i>Proof of Identity of the Reported Compounds 13, 15, 21, 22a</i> .....                                              | S46 |
| <i>VII</i> | <i>Detailed Calculation for the Determination of the Cycloadducts 24/25 Ratios</i> .....                              | S48 |

## ***I General Experimental Details***

All required fine chemicals were used directly without purification unless mentioned. Compounds lacking experimental details were prepared according to the literature as cited and are in agreement with published spectra. THF and Et<sub>2</sub>O were distilled from Na and benzophenone at atmospheric pressure. CH<sub>2</sub>Cl<sub>2</sub>, benzene, toluene and diisopropylamine were distilled from CaH<sub>2</sub> at atmospheric pressure. Infrared spectra were recorded with a FT-IR spectrometer by applying substrates as thin films onto a KBr plate. <sup>1</sup>H (300 MHz) NMR and <sup>13</sup>C (75 MHz) NMR spectra are given in ppm as referenced to CDCl<sub>3</sub> (7.26 ppm for <sup>1</sup>H NMR and 77.0 ppm for <sup>13</sup>C NMR) and were measured with a 300 MHz NMR spectrometer. For the determination of the ratios of **24/25a-e**, the <sup>1</sup>H NMR spectra were recorded with a relaxation delay of 4 sec.<sup>1</sup> 2D experiments (COSY, NOESY, TOCSY, HSQC and HMBC) were measured with a 600 MHz NMR spectrometer. <sup>1</sup>H NMR coupling constants are reported in hertz and refer to apparent multiplicities and not true coupling constants. 230-400 Mesh silica gel was used for column chromatography, while 250 μm silica gel plates were used for TLC analysis. All reactions were conducted under nitrogen or argon in flame-dried glassware and concentrations were performed under reduced pressure using a rotary evaporator.

## ***II Procedures and Spectroscopic Data of Compounds 2, 7, 8, 10, 11, 15, 20, 22-25.***

**2-(Pent-4-en-1-yn-1-yl)oct-7-enoic acid (2).** *n*-BuLi (2.38 M in hexanes, 8.0 mL, 19 mmol) was added to a solution of *i*-Pr<sub>2</sub>NH (2.7 mL, 19 mmol) in THF (20 mL) at 0°C. After 30 min at 0°C, a precooled (0°C) solution of **1** (1.00 g 7.80 mmol) in THF (7 mL) and DMPU (1.9 mL) was added. The solution was stirred 1 h at rt, cooled to 0°C, then 6-iodohex-1-ene (1.30 mL, 9.4 mmol) was added. After 2 h at rt, H<sub>2</sub>O was added THF was evaporated under reduced pressure. The aqueous phase was extracted with Et<sub>2</sub>O and the combined organic layers were dried over anhyd. MgSO<sub>4</sub>, filtered and concentrated under reduced pressure. The crude material was purified by flash chromatography (94:5:1 hexanes-EtOAc-AcOH) to give 1.00 g (60 %) of pure **2** as a colorless oil: <sup>1</sup>H NMR (300 MHz, CDCl<sub>3</sub>) δ 5.86–5.72 (m, 2H), 5.04 – 4.92 (m, 4H), 2.39 – 2.31 (m, 1H), 2.11 – 2.01 (m, 4H), 1.70 – 1.60 (m, 2H), 1.58 – 1.28 (m, 8H); <sup>13</sup>C

NMR (75 MHz,  $\text{CDCl}_3$ )  $\delta$  181.9, 138.7, 138.3, 114.7, 114.4, 45.2, 33.5, 31.9, 28.7, 26.7, 26.5; IR (film)  $\nu$  3081, 2980, 2931, 2856, 1703, 1288, 1235, 909  $\text{cm}^{-1}$ ; MS (CI)  $m/z$  211 (35) [ $\text{MH}^+$ ], 193 (18), 165 (13), 141 (15), 124 (29); HRMS (EI) calcd for  $\text{C}_{13}\text{H}_{23}\text{O}_2$  ( $\text{MH}^+$ ) 211.1698, found 211.1702.

**2-Hexylhept-6-enoic acid (7).** Following the procedure used to form **2**, a solution of **1** (1.00 g, 7.8 mmol) in THF (7 mL) and DMPU (1.9 mL) was treated with LDA [prepared from *n*-BuLi (2.38 M in hexanes, 8.0 mL, 19.0 mmol) and *i*-Pr<sub>2</sub>NH (2.7 mL, 19.2 mmol) in THF (20 mL)] and 1-iodohexane (1.22 mL, 8.9 mmol) in THF (11 mL) to give, after purification by flash chromatography (94:5:1 hexanes–EtOAc–AcOH), 1.00 g (59 %) of pure **7** as a colorless oil: <sup>1</sup>H NMR (300 MHz,  $\text{CDCl}_3$ )  $\delta$  5.78 (ddt,  $J$ =17.0, 10.5, 6.5 Hz, 1H), 5.00 (dd,  $J$ =19.0, 1.5 Hz, 1H), 4.95 (d,  $J$ =9.0 Hz, 1H), 2.41 – 2.31 (m, 1H), 2.11 – 2.02 (m, 2H), 1.70 – 1.27 (m, 14H), 0.89 – 0.85 (m, 3H); <sup>13</sup>C NMR (75 MHz,  $\text{CDCl}_3$ )  $\delta$  183.3, 138.2, 114.7, 45.4, 33.6, 32.2, 31.5, 29.2, 27.2, 26.5, 22.5, 14.0; IR (film)  $\nu$  3081 (br), 2935, 2860, 2684, 1703, 1456, 1288, 1231, 904  $\text{cm}^{-1}$ ; MS (CI)  $m/z$  230 (100) [ $\text{MNH}_4^+$ ], 213 (30) [ $\text{MH}^+$ ], 195 (15), 141 (4), 126 (7); HRMS (CI) calcd for  $\text{C}_{13}\text{H}_{25}\text{O}_2$  ( $\text{MH}^+$ ) 213.1854, found 213.1849.

**1-Hexylbicyclo[3.2.0]heptan-7-one (8) from 5** Pd/C (5 % w/w, 2 mg) was added to a solution of **5** (30 mg, ) in EtOAc (3 mL). The flask was purged with H<sub>2</sub> then the suspension was stirred for 2 h at rt. The flask was purged with N<sub>2</sub>, then the suspension was filtered on Celite and the filtrate was concentrated under reduced pressure. The crude material was purified by flash chromatography (19:1 hexanes–EtOAc) to give 28.5 g (95 %) of pure **8**. **1-Hexylbicyclo[3.2.0]heptan-7-one (8) from 7.** Following the procedure used to form **5**, **7** (400 mg, 1.9 mmol) was treated with oxalyl chloride (830  $\mu\text{L}$ , 9.5 mmol) in toluene (2.0 mL) then with Et<sub>3</sub>N (1.6 mL, 11 mmol) in toluene (33 mL) to give, after purification by flash chromatography (19:1 hexanes–EtOAc), 313 mg (85 %) of pure **8** as a colorless oil: <sup>1</sup>H NMR (300 MHz,  $\text{CDCl}_3$ )  $\delta$  3.02 (dd,  $J$ =18.5, 9.0 Hz, 1H), 2.50 – 2.45 (m, 1H), 2.34 (dd,  $J$ =18.5, 5.0 Hz, 1H), 1.92 (dd,  $J$ =21.5, 6.0 Hz, 1H), 1.79 – 1.19 (m, 15H), 0.82 – 0.78 (m, 3H); <sup>13</sup>C NMR (75 MHz,  $\text{CDCl}_3$ )  $\delta$  218.2, 75.9, 49.2, 35.2, 33.8, 33.1, 32.6, 31.6, 29.7, 25.5, 24.9, 22.5, 14.0; IR (film)  $\nu$  2949 (br), 2856, 1770, 1465, 1386, 1076  $\text{cm}^{-1}$ ; MS (EI)  $m/z$  194 (2) [ $\text{M}^+$ ], 152 (48), 123 (11), 110 (14), 95 (41), 82 (100); HRMS (EI) calcd for  $\text{C}_{13}\text{H}_{22}\text{O}$  ( $\text{M}^+$ ) 194.1671, found 194.1673.

**2-Pentyloct-7-enoic acid (10).** Following the procedure used to form **2**, a solution of **9** (1.00 g, 7.7 mmol) in THF (7 mL) and DMPU (1.9 mL) was treated with LDA [prepared from *n*-BuLi (2.38 M in hexanes, 8.0 mL, 19.0 mmol) and *i*-Pr<sub>2</sub>NH (2.7 mL, 19.2 mmol) in THF (20 mL)] and 6-iodohex-1-ene (1.22 mL, 8.8 mmol) in THF (11 mL) to give, after purification by flash chromatography (94:5:1 hexanes–EtOAc–AcOH), 1.13 g (67 %) of pure **10** as a colorless oil: <sup>1</sup>H NMR (300 MHz, CDCl<sub>3</sub>) δ 5.79 (ddt, *J*=17.0, 10.5, 6.5 Hz, 1H), 4.98 (dd, *J*=17.0, 1.5 Hz, 1H), 4.93 (dd, *J*=10.5, 1.5 Hz, 1H), 2.41 – 2.29 (m, 1H), 2.08 – 2.01 (m, 2H), 1.69 – 1.28 (m, 14H), 0.90 – 0.85 (m, 3H); <sup>13</sup>C NMR (75 MHz, CDCl<sub>3</sub>) δ 183.3, 138.4, 114.3, 45.5, 33.5, 32.1, 31.9, 28.7, 26.9, 26.7, 22.4, 13.9; IR (film) ν 3081, 2936, 2856, 1703, 1465, 1231, 909 cm<sup>-1</sup>; MS (CI) *m/z* 240 (14) [MNH<sub>4</sub><sup>+</sup>], 213 (31) [MH<sup>+</sup>], 155 (8), 124 (19); HRMS (CI) calcd for C<sub>13</sub>H<sub>25</sub>O<sub>2</sub> (MH<sup>+</sup>) 213.1854, found 213.1851.

**1-Pentylbicyclo[4.2.0]octan-8-one (11).** Following the procedure used to form **5**, **10** (1.79 g, 8.4 mmol) was treated with oxalyl chloride (3.7 mL, 42 mmol) in toluene (8 mL) then with Et<sub>3</sub>N (5 mL, 35.9 mmol) in toluene (141 mL) to give, after purification by flash chromatography (19:1 hexanes–EtOAc), 175 mg (1.1 %) of pure **8** as a colorless oil: <sup>1</sup>H NMR (300 MHz, CDCl<sub>3</sub>) δ 2.98 (dd, *J*=17.0 Hz, 9.5 Hz, 1H), 2.79 (dd, *J*=17.0 Hz, 7.0 Hz, 1H), 2.27–2.18 (m, 1H), 1.86–1.69 (m, 2H), 1.53–1.19 (m, 14H), 0.85 (t, *J*=6.5 Hz, 3H); <sup>13</sup>C NMR (75 MHz, CDCl<sub>3</sub>) δ 214.0, 63.7, 48.1, 36.4, 32.4, 28.4, 27.3, 26.0, 24.4, 22.5, 21.2, 20.5, 14.0; IR (film) ν 2927, 2856, 1774, 1456, 1165, 1068 cm<sup>-1</sup>; MS (EI) *m/z* 194 (1) [M<sup>+</sup>], 152 (55), 96 (100), 81 (83), 67 (42), 55 (20), 41 (26); HRMS (EI) calcd for C<sub>13</sub>H<sub>22</sub>O 194.1671, found 194.1666.

**(E)-5-Phenylpent-4-en-1-ol (15).** DIBALH (1.0 M in CH<sub>2</sub>Cl<sub>2</sub>, 53 mL, 53 mmol) was added to a precooled (–78°C) solution of ester **14** (2.7 g, 13 mmol) in THF (130 mL). After 4 h at –78°C, acetone (52 mL) was added and the solution was allowed to warm to rt. A saturated aq solution of potassium and sodium tartrate (160 mL) was added and the mixture was vigorously stirred overnight. THF was evaporated under reduced pressure and the aqueous phase was extracted with Et<sub>2</sub>O. The combined organic layers were dried over anhyd. MgSO<sub>4</sub>, filtered and concentrated under reduced pressure. The crude material was purified by flash chromatography (13:1 hexanes–EtOAc) to give 2.11 g (100 %) of

pure **15** as a colorless oil:  $^1\text{H}$  NMR (300 MHz,  $\text{CDCl}_3$ )  $\delta$  7.60–7.17 (m, 5H), 6.43 (d,  $J=16.0$  Hz, 1H), 6.23 (dt,  $J=16.0$ , 7.0 Hz, 1H), 3.72 (t,  $J=7.0$  Hz, 2H) 2.32 (q,  $J=7.0$  Hz, 2H), 1.76 (qn,  $J=7.0$  Hz, 2H), 1.39 (br s, 1H);  $^{13}\text{C}$  NMR (75 MHz,  $\text{CDCl}_3$ )  $\delta$  130.4, 130.0, 128.4, 127.0, 125.9, 62.4, 32.2, 29.3; MS (EI)  $m/z$  162 (34) [ $\text{M}^+$ ], 143 (23), 129 (100), 115 (60), 91 (48); HRMS (EI) calcd for  $\text{C}_{11}\text{H}_{14}\text{O}$  162.1045, found 162.1054.<sup>2</sup>

**(E)-2,2-Dimethyl-5-(5-phenylpent-4-enyl)-[1,3]dioxane-4,6-dione (20)**. A solution of DMSO (3.41 mL, 48 mmol) in  $\text{CH}_2\text{Cl}_2$  (7 mL) was added to a solution of oxalyl chloride (2.09 mL, 24 mmol) in  $\text{CH}_2\text{Cl}_2$  (54 mL) at  $-78^\circ\text{C}$ . After 5 min at  $-78^\circ\text{C}$ , a precooled ( $-78^\circ\text{C}$ ) solution of **15** (3.81 g, 20 mmol) in  $\text{CH}_2\text{Cl}_2$  (13 mL) was added and the reaction mixture was stirred 15 min at  $-78^\circ\text{C}$  then 1 h at  $-40^\circ\text{C}$ . A solution of  $\text{Et}_3\text{N}$  (13.9 mL, 100 mmol) in  $\text{CH}_2\text{Cl}_2$  (13 mL) was added and the reaction mixture was allowed to warm to rt over 4h.  $\text{H}_2\text{O}$  was added and the aqueous phase was extracted with  $\text{CH}_2\text{Cl}_2$ . The combined organic layers were washed with 1 N HCl, brine, dried over anhyd.  $\text{MgSO}_4$ , filtered and concentrated under reduced pressure. The crude material was purified by flash chromatography (9:1 to 5:1 hexanes–EtOAc) to give 3.26 g (87 %) of pure aldehyde as a colorless oil:  $^1\text{H}$  NMR (300 MHz,  $\text{CDCl}_3$ )  $\delta$  9.83 (s, 1H), 7.36–7.18 (m, 5H), 6.44 (d,  $J=16.0$  Hz, 1H), 6.21 (dt,  $J=16.0$ , 6.5 Hz, 1H), 2.64–2.54 (m, 4H);  $^{13}\text{C}$  NMR (75 MHz,  $\text{CDCl}_3$ )  $\delta$  201.7, 137.2, 131.1, 128.5, 128.1, 127.2, 126.0, 43.3, 25.5; IR (film)  $\nu$  3028, 2913, 2830, 2724, 1717, 970  $\text{cm}^{-1}$ ; MS (EI)  $m/z$  160 (38) [ $\text{M}^+$ ], 115 (57), 104 (100), 91 (46); HRMS (EI) calcd for  $\text{C}_{11}\text{H}_{12}\text{O}$  160.0888, found 160.0886.<sup>3</sup> Following the procedure used to form **13**, the previously prepared aldehyde (1.43 g, 8.9 mmol) was treated with  $\text{BH}_3\cdot\text{HNMe}_2$  complex (530 mg, 9.0 mmol) in MeOH (7 mL) to give 1.28 g (49%) of pure **20** (without purification) as a white solid: m.p. 78–82 $^\circ\text{C}$ ;  $^1\text{H}$  NMR (300 MHz,  $\text{CDCl}_3$ )  $\delta$  7.36–7.26 (m, 4H), 7.21–7.17 (m, 1H), 6.42 (d,  $J=16.0$  Hz, 1H), 6.20 (dt,  $J=16.0$ , 7.0 Hz, 1H), 3.54 (t,  $J=5.0$  Hz, 2H), 2.29 (q,  $J=7.0$  Hz, 2H), 1.77 (s, 3H), 1.76 (s, 3H), 1.71 – 1.61 (m, 2H);  $^{13}\text{C}$  NMR (75 MHz,  $\text{CDCl}_3$ )  $\delta$  165.4, 137.6, 130.6, 129.6, 128.4, 127.0, 126.0, 104.5, 46.1, 32.8, 28.4, 26.9, 26.0; IR (film)  $\nu$  3028, 2944, 2869, 1783, 1743, 1293  $\text{cm}^{-1}$ ; MS (CI)  $m/z$  306 (100) [ $\text{MNH}_4^+$ ], 248 (50), 230 (92), 204 (72), 184 (52), 130 (52); HRMS (CI) calcd for  $\text{C}_{17}\text{H}_{20}\text{O}_4\cdot\text{NH}_4^+$  306.1705, found 306.1700.

**(E)-5-(p-Methoxyphenyl)pent-4-en-1-ol (22a).** PPh<sub>3</sub> (1.05 g, 4.0 mmol) was added to a solution of palladium (II) acetate (200 mg, 0.89 mmol) in THF (15 mL) at rt. After 20 min at rt, NaOH (3.0 g, 75 mmol), THF (25 mL) and a solution of 4-iodoanisole (5.27 g, 23 mmol) in THF (25 mL) were added at rt, followed by the addition of **21** (7.85 g, 25 mmol). After stirring at reflux overnight, the solution was allowed to cool to rt, then 3N HCl (40 mL) was added (the solution became black). After 4 h at rt, benzene was added followed by 1N NaOH (until pH = 7). The layers were separated and the organic phase was washed with 1N NaOH (until the aq phase remains colorless), brine, dried over anhyd. MgSO<sub>4</sub>, filtered and concentrated under reduced pressure. The crude material was purified by flash chromatography (9:1 hexanes–EtOAc) to give 2.23 g (52 %) of pure **22a** as an orange solid: m.p. 72.5–74°C; <sup>1</sup>H NMR (300 MHz, CDCl<sub>3</sub>) δ 7.27 (d, *J*=8.5 Hz, 2H), 6.84 (d, *J*=8.5 Hz, 2H), 6.35 (d, *J*=16.0 Hz, 1H), 6.12 (dt, *J*=16.0, 7.0 Hz, 1H), 3.80 (s, 3H), 3.70 (t, *J*=7.0 Hz, 2H), 2.29 (q, *J*=7.0 Hz, 2H), 1.74 (qn, *J*=7.0 Hz, 2H), 1.40 (br s, 1H); MS (EI) *m/z* 192 (83) [M<sup>+</sup>], 147 (100), 121 (76), 115 (23); HRMS (EI) calcd for C<sub>12</sub>H<sub>16</sub>O<sub>2</sub> 192.1150, found 192.1153.<sup>1b</sup>

**(E)-5-(p-Tolyl)pent-4-en-1-ol (22b).** Following the procedure used to form **22a**, NaOH (3.0 g, 75 mmol) and THF (25 mL) were added to a solution of PPh<sub>3</sub> (1.05 g, 4 mmol) and palladium (II) acetate (0.2 g, 0.9 mmol) in THF (25 mL), followed by a solution of 4-iodotoluene (4.9 g, 22.5 mmol) in THF (25 mL) then addition of **21** (7.85 g, 24.7 mmol) and 3N HCl (40 mL) to give, after purification by flash chromatography (9:1 hexanes–EtOAc), 2.06 g (52 %) of pure **22b** as a colorless oil: <sup>1</sup>H NMR (300 MHz, CDCl<sub>3</sub>) δ 7.27 (d, *J*=8.5 Hz, 2H), 7.13 (d, *J*=8.5 Hz, 2H), 6.42 (d, *J*=16.0 Hz, 1H), 6.20 (dt, *J*=16.0, 7.0 Hz, 1H), 3.70 (t, 7.0 Hz, 2H), 2.36 (s, 3H), 2.31 (q, *J*=7.0 Hz, 2H), 2.28 (s, 1H), 1.76 (qn, *J*=7.0 Hz, 2H); <sup>13</sup>C NMR (75 MHz, CDCl<sub>3</sub>) δ 136.7, 134.8, 130.2, 129.2, 129.0, 125.8, 62.2, 32.3, 29.3, 21.2; IR (film) ν 3307 (br), 3028, 2940, 2874, 966 cm<sup>-1</sup>; MS (EI) *m/z* 176 (61) [M<sup>+</sup>], 143 (100), 131 (91), 115 (59), 105 (63); HRMS (EI) calcd for C<sub>12</sub>H<sub>16</sub>O 176.1201, found 176.1203.<sup>2b</sup>

**(E)-5-(p-Chlorophenyl)pent-4-en-1-ol (22c).** Following the procedure used to form **22a**, NaOH (3.1 g, 78 mmol) and THF (25 mL) were added to a solution of PPh<sub>3</sub> (970 mg, 3.7 mmol) and palladium (II) acetate (210 mg, 0.93 mmol) in THF (15 mL), followed by a solution of 4-chloriodobenzene (4.7 g, 20 mmol) in THF (25 mL) then addition of **21** (8.25 g, 22 mmol) and 3N HCl (30 mL) to give, after

purification by flash chromatography (1:0 to 4:1 CH<sub>2</sub>Cl<sub>2</sub>–MeOH), 3.2 g (82 %) of pure **22c** as a colorless oil: <sup>1</sup>H NMR (300 MHz, CDCl<sub>3</sub>) δ 7.24 (s, 4H), 6.35 (d, *J*=16.0 Hz, 1H), 6.19 (dt, *J*=16.0, 7.0 Hz, 1H), 3.69 (t, *J*=7.0 Hz, 2H), 2.29 (q, *J*=7.0 Hz, 2H), 1.91 (br s, 1H), 1.74 (qn (*J*=7.0 Hz, 2H); <sup>13</sup>C NMR (75 MHz, CDCl<sub>3</sub>) δ 136.1, 132.4, 130.8, 129.1, 128.6, 127.1, 62.2, 32.1, 29.3; IR (film) ν 3378 (br), 3032, 2934, 2868, 1646, 1491, 1094, 1059 cm<sup>-1</sup>; MS (EI) *m/z* 196 (35) [M<sup>+</sup>], 151 (22), 143 (100), 128 (64), 115 (79); HRMS (EI) calcd for C<sub>11</sub>H<sub>13</sub>ClO 196.0655, found 196.0658.

**(E)-5-(*p*-Trifluoromethylphenyl)pent-4-en-1-ol (22d).** Following the procedure used to form **22a**, NaOH (2.4 g, 60 mmol) and THF (20 mL) were added to a solution of PPh<sub>3</sub> (730 mg, 2.8 mmol) and palladium (II) acetate (160 mg, 0.72 mmol) in THF (15 mL), followed by a solution of 4-iodo(trifluoromethyl)benzene (4.9 g, 18 mmol) in THF (20 mL) then addition of **21** (6.27 g, 20 mmol) and 3N HCl (40 mL) to give, after purification by flash chromatography (9:1 hexanes–EtOAc), 4.0 g (97 %) of pure **22d** as a colorless oil: <sup>1</sup>H NMR (300 MHz, CDCl<sub>3</sub>) δ 7.54 (d, *J*=8.5 Hz, 2H), 7.42 (d, *J*=8.5 Hz, 2H), 6.45 (d, *J*=16.0 Hz, 1H), 6.34 (dt, *J*=16.0, 7.0 Hz, 1H), 3.72 (t, *J*=7.0 Hz, 2H), 2.35 (q, *J*=7.0 Hz, 2H), 1.77 (qn, *J*=7.0 Hz, 2H); <sup>13</sup>C NMR (75 MHz, CDCl<sub>3</sub>) δ 141.1, 132.9, 129.1, 28.9, 128.5, 126.0, 125.4, 62.1, 32.0, 29.3; IR (film) ν 3333 (br), 2944, 2878, 1615, 1324, 1121, 1068 cm<sup>-1</sup>; MS (EI) *m/z* 230 (30) [M<sup>+</sup>], 212 (40), 197 (55), 143 (100); HRMS (EI) calcd for C<sub>12</sub>H<sub>13</sub>F<sub>3</sub>O 230.0918, found 230.0924.

**(E)-5-(*p*-Nitrophenyl)pent-4-en-1-ol (22e).** Following the procedure used to form **22a**, NaOH (3.1 g, 78 mmol) and THF (25 mL) were added to a solution of PPh<sub>3</sub> (970 mg, 3.7 mmol) and palladium (II) acetate (210 mg, 0.93 mmol) in THF (15 mL), followed by a solution of 4-iodonitrobenzene (4.9 g, 20 mmol) in THF (25 mL) then addition of **21** (7.0 g, 22 mmol) and 3N HCl (30 mL) to give, after purification by flash chromatography (9:1 hexanes–EtOAc), 3.09 g (75 %) of pure **22e** as an orange solid: m.p. 53 – 54°C; <sup>1</sup>H NMR (300 MHz, CDCl<sub>3</sub>) δ 8.14 (d, *J*=9.0 Hz, 2H), 7.44 (d, *J*=8.0 Hz, 2H), 6.52–6.39 (m, 2H), 3.72 (t, *J*=6.5 Hz, 2H), 2.37 (q, *J*=6.5 Hz, 2H), 1.77 (qn, *J*=6.5 Hz, 2H), 1.52 (br s, 1H); <sup>13</sup>C NMR (75 MHz, CDCl<sub>3</sub>) δ 146.4, 144.2, 135.7, 128.5, 126.4, 123.9, 62.0, 31.8, 29.4; IR (film) ν 3543, 2939, 2884, 1593, 1506, 1340 cm<sup>-1</sup>; MS (EI) *m/z* 207 (18) [M<sup>+</sup>], 172 (30), 128 (100), 115 (91); HRMS (EI) calcd for C<sub>11</sub>H<sub>13</sub>NO<sub>3</sub> 207.0895, found 207.0898.

**(4*E*,6*E*)-7-(*p*-Methoxyphenyl)-2-(5-phenylpent-4-enyl)hept-6-enoic acid (23a).** Following the procedure used to form **16**, **22a** (700 mg, 3.64 mmol) was treated with I<sub>2</sub> (924 mg, 3.64 mmol), PPh<sub>3</sub> (944 mg, 3.60 mmol) and imidazole (298 mg, 4.37 mmol) in CH<sub>2</sub>Cl<sub>2</sub> (10 mL) to give, after purification by flash chromatography (49:1 hexanes–EtOAc), 1.0 g (91 %) of pure iodide as a colorless oil: <sup>1</sup>H NMR (300 MHz, CDCl<sub>3</sub>) δ 7.34 (d, *J*=8.5 Hz, 2H), 6.91 (d, *J*=8.5 Hz, 2H), 6.45 (d, *J*=16 Hz, 1H), 6.05 (dt, *J*=16.0, 7.0 Hz, 1H), 3.82 (s, 3H), 3.25 (t, *J*=7.0 Hz, 2H), 2.34 (q, *J*=7.0 Hz, 2H), 2.01 (qn, *J*=7.0 Hz, 2H); <sup>13</sup>C NMR (75 MHz, CDCl<sub>3</sub>) δ 158.9, 130.8, 130.3, 127.3, 126.1, 114.1, 55.4, 33.7, 33.1, 6.9; IR (film) ν 3033, 2997, 2925, 2834, 1608, 1510, 1463, 1441, 1248 cm<sup>-1</sup>; MS (EI) *m/z* 302 (20) [M<sup>+</sup>], 147 (40), 84 (100); HRMS (EI) calcd for C<sub>12</sub>H<sub>15</sub>IO 302.0168, found 302.0177. Following the procedure used to form **16**, the previously prepared iodide (220 mg, 0.69 mmol) was treated with Cs<sub>2</sub>CO<sub>3</sub> (346 mg, 1.06 mmol) and **20** (153 mg, 0.53 mmol) in MeCN (1.5 mL) to give, after purification by flash chromatography (20:1 hexanes–EtOAc), 170 mg (67%) of pure branched Meldrum's acid as a colorless oil: <sup>1</sup>H NMR (300 MHz, CDCl<sub>3</sub>) δ 7.35–7.20 (m, 7H), 6.84 (d, *J*=9.0 Hz, 2H), 6.35 (t, *J*=16.0 Hz, 2H), 6.13 (dt, *J*=16.0, 7.0 Hz, 1H), 5.98 (dt, *J*=16.0, 7.5 Hz, 1H), 3.80 (s, 3H), 2.21 (qn, *J*=7.0 Hz, 4H), 2.10–2.04 (m, 4H), 1.74 (s, 6H), 1.54–1.42 (m, 4H); <sup>13</sup>C NMR (75 MHz, CDCl<sub>3</sub>) δ 169.4, 158.8, 137.4, 130.9, 130.2, 129.0, 128.5, 127.1, 126.8, 126.0, 113.9, 105.5, 55.3, 54.6, 38.9, 32.7, 29.8, 25.5, 25.4; IR (film) ν 3028, 2935, 2838, 1774, 1748, 1509, 1249 cm<sup>-1</sup>; MS (CI) *m/z* 480 (38) [MNH<sub>4</sub><sup>+</sup>], 462 (25) [M<sup>+</sup>], 405 (55), 378 (53), 361 (100), 253 (90), 121 (73); HRMS (EI) calcd for C<sub>29</sub>H<sub>34</sub>O<sub>5</sub> 462.2406, found 462.2397. Following the procedure used to form **17**, the previously prepared branched Meldrum's acid (170 mg, 0.37 mmol) was heated in THF (1.2 mL) and H<sub>2</sub>O (0.6 mL), to give, after purification by flash chromatography (14:1 hexanes–EtOAc), 102 mg (73%) of pure **23a** as a white solid: m.p. 80 – 84.5°C : <sup>1</sup>H NMR (300 MHz, CDCl<sub>3</sub>) δ 7.36–7.19 (m, 7H), 6.84 (d, *J*=9.0 Hz, 2H), 6.36 (t, *J*=16.0 Hz, 2H), 6.20 (dt, *J*=16.0, 8.0 Hz, 1H), 6.05 (dt, *J*=16.0, 7.0 Hz, 1H), 3.81 (s, 3H), 2.44–2.40 (m, 1H), 2.22 (qn, *J*=6.5 Hz, 4H), 1.73–1.66 (m, 2H), 1.66–1.45 (m, 6H); <sup>13</sup>C NMR (75 MHz, CDCl<sub>3</sub>) δ 182.5, 158.7, 137.7, 130.5, 130.2, 129.6, 128.4, 128.0, 127.0, 126.9, 125.9, 113.9, 113.6, 55.3, 45.2, 32.8, 31.6, 27.1, 27.0; IR (film) ν 3449,



3024, 2931, 2856, 1703, 1646, 1606, 1509, 1244  $\text{cm}^{-1}$ ; MS (EI)  $m/z$  378 (88) [ $\text{M}^+$ ], 173 (17), 147 (100), 121 (43), 91 (28); HRMS (EI) calcd for  $\text{C}_{25}\text{H}_{30}\text{O}_3$  378.2195, found 378.2185.

**(4*cE*,6*E*)-2-(5*c*-Phenylpent-4*c*-enyl)-7-(*p*-tolyl)hept-6-enoic acid (23b).** Following the procedure used to form **16**, **22b** (1.21 g, 6.8 mmol) was treated with  $\text{I}_2$  (1.78 g, 7.0 mmol),  $\text{PPh}_3$  (1.78 g, 6.7 mmol) and imidazole (570 mg, 8.4 mmol) in  $\text{CH}_2\text{Cl}_2$  (84 mL) to give, after purification by flash chromatography (49:1 hexanes–EtOAc), 1.63 g (82 %) of pure iodide as a colorless oil  $^1\text{H}$  NMR (300 MHz,  $\text{CDCl}_3$ )  $\delta$  7.62 (d,  $J=7.5$  Hz, 2H), 7.13 (d,  $J=7.5$  Hz, 2H), 6.44 (d,  $J=16.0$  Hz, 1H), 6.11 (dt,  $J=16.0, 7.0$  Hz, 1H), 3.24 (t,  $J=7.0$  Hz, 2H), 2.37–2.29 (m, 5H), 2.00 (qn,  $J=7.0$  Hz, 2H);  $^{13}\text{C}$  NMR (75 MHz,  $\text{CDCl}_3$ )  $\delta$  136.9, 134.7, 131.2, 129.2, 127.2, 125.9, 33.5, 32.9, 21.2, 6.5; IR (film)  $\nu$  3019, 2931, 2838, 1514, 1434, 1213, 966  $\text{cm}^{-1}$ ; MS (EI)  $m/z$  286 (37) [ $\text{M}^+$ ], 131 (100), 115 (29), 105 (21), 91 (21); HRMS (EI) calcd for  $\text{C}_{12}\text{H}_{15}\text{I}$  286.0218, found 283.0221. Following the procedure used to form **16**, the previously prepared iodide (1.63 g, 5.7 mmol) was treated with  $\text{Cs}_2\text{CO}_3$  (3.29 g, 11 mmol) and **20** (1.25 g, 3.8 mmol) in MeCN (6 mL) to give, after purification by flash chromatography (13:1 hexanes–EtOAc), 1.36 g (80 %) of pure branched Meldrum's acid as a colorless oil:  $^1\text{H}$  NMR (300 MHz,  $\text{CDCl}_3$ )  $\delta$  7.41 – 7.23 (m, 7H), 7.15 (d,  $J=8.5$  Hz, 2H), 6.43 (d,  $J=16.0$  Hz, 1H), 6.41 (d,  $J=16.0$  Hz, 1H), 6.23 – 6.08 (m, 2H), 2.38 (s, 3H), 2.28 – 2.23 (m, 4H), 2.16 – 2.09 (m, 4H), 1.75 (s, 6H), 1.55 – 1.30 (m, 4H);  $^{13}\text{C}$  NMR (75 MHz,  $\text{CDCl}_3$ )  $\delta$  169.3, 137.5, 136.7, 134.7, 131.0, 130.0, 129.3, 129.0, 128.6, 128.0, 127.1, 126.1, 105.5, 54.7, 38.9, 29.8, 25.4, 21.2, 14.3; IR (film)  $\nu$  3028, 2927, 2856, 1774, 1739, 1266, 966  $\text{cm}^{-1}$ ; MS (CI)  $m/z$  464 (100) [ $\text{MNH}_4^+$ ], 406 (15), 389 (21), 362 (43), 345 (78); HRMS (CI) calcd for  $\text{C}_{29}\text{H}_{38}\text{NO}_4$  ( $\text{MNH}_4^+$ ) 464.2801, found 464.2807. Following the procedure used to form **17**, the previously prepared branched Meldrum's acid (1.0 g, 2.2 mmol) was heated in THF (7.3 mL) and  $\text{H}_2\text{O}$  (3.6 mL), to give, after purification by flash chromatography (9:1 hexanes–EtOAc), 553 mg (70 %) of pure **23b** as a white solid: m.p. 90 – 93°C;  $^1\text{H}$  NMR (300 MHz,  $\text{CDCl}_3$ )  $\delta$  12.05 (br s, 1H), 7.47 – 7.26 (m, 7H), 7.21 (d,  $J=7.5$  Hz, 2H), 6.50 (d,  $J=16.0$  Hz, 1H), 6.47 (d,  $J=16.0$  Hz, 1H), 6.35 – 6.20 (m, 2H), 2.61 – 2.48 (m, 1H), 2.44 (s, 3H), 2.37 – 2.29 (m, 4H), 1.90 – 1.81 (m, 2H), 1.77 – 1.56 (m, 6H);  $^{13}\text{C}$  NMR (75 MHz,  $\text{CDCl}_3$ )  $\delta$  183.3, 137.8, 136.7, 135.0, 130.3, 129.3, 128.6, 127.0, 126.1, 126.0, 45.4, 32.9, 31.7, 27.2, 21.3; IR

(film)  $\nu$  3024, 2943, 2856, 2662, 1699, 1452, 962, 732  $\text{cm}^{-1}$ ; MS (EI)  $m/z$  362 (16) [ $\text{M}^+$ ], 157 (16), 143 (19), 131 (26), 84 (100); HRMS (EI) calcd for  $\text{C}_{25}\text{H}_{30}\text{O}_2$  362.2246, found 362.2240.

**(4*E*,6*E*)-7-(*p*-Chlorophenyl)-2-(5*c*-phenylpent-4*c*-enyl)hept-6-enoic acid (23c).** Following the procedure used to form **16**, **22c** (800 mg, 4.1 mmol) was treated with  $\text{I}_2$  (1.03 g, 4.1 mmol),  $\text{PPh}_3$  (1.06 g, 4.0 mmol) and imidazole (333 mg, 4.9 mmol) in  $\text{CH}_2\text{Cl}_2$  (10 mL) to give, after purification by flash chromatography (32:1 hexanes–EtOAc), 1.0 g (80 %) of pure iodide as a colorless oil:  $^1\text{H}$  NMR (300 MHz,  $\text{CDCl}_3$ )  $\delta$  7.27 (s, 4H), 6.40 (d,  $J=16.0$  Hz, 1H), 6.13 (dt,  $J=16.0, 7.0$  Hz, 1H), 3.23 (t,  $J=7.0$  Hz, 2H), 2.33 (q,  $J=7.0$  Hz, 2H), 1.99 (qn,  $J=7.0$  Hz, 2H);  $^{13}\text{C}$  NMR (75 MHz,  $\text{CDCl}_3$ )  $\delta$  135.9, 132.6, 130.1, 129.0, 128.6, 127.2, 33.5, 32.7, 6.2; IR (film)  $\nu$  3025, 2930, 2837, 1489, 1216, 1092, 967  $\text{cm}^{-1}$ ; MS (EI)  $m/z$  306 (41) [ $\text{MH}^+$ ], 151 (100), 125 (34), 115 (80); HRMS (EI) calcd for  $\text{C}_{11}\text{H}_{12}\text{ClI}$  305.9672, found 305.9675. Following the procedure used to form **16**, the previously prepared iodide (461 mg, 1.5 mmol) was treated with  $\text{Cs}_2\text{CO}_3$  (1.27 g, 3.9 mmol) and **20** (375 mg, 1.3 mmol) in MeCN (3 mL) to give, after purification by flash chromatography (13:1 hexanes–EtOAc), 410 mg (67%) of pure branched Meldrum's acid as a colorless oil:  $^1\text{H}$  NMR (300 MHz,  $\text{CDCl}_3$ )  $\delta$  7.35 – 7.18 (m, 9H), 6.38 (d,  $J=16.5$  Hz, 1H), 6.33 (d,  $J=16.0$  Hz, 1H), 6.18 – 6.05 (m, 2H), 2.27 – 2.18 (m, 4H), 2.13 – 2.05 (m, 4H), 1.74 (s, 6H), 1.58 – 1.45 (m, 4H);  $^{13}\text{C}$  NMR (75 MHz,  $\text{CDCl}_3$ )  $\delta$  169.3, 137.4, 135.9, 132.6, 131.0, 129.7, 128.9, 128.5, 127.3, 127.1, 126.0, 105.6, 54.5, 38.8, 32.7, 29.8, 25.3; IR (film)  $\nu$  3028, 2938, 2860, 1770, 1739, 1266, 1200, 967  $\text{cm}^{-1}$ ; MS (CI)  $m/z$  484 (87) [ $\text{MNH}_4^+$ ], 409 (20), 365 (100), 347 (43); HRMS (CI) calcd for  $\text{C}_{28}\text{H}_{35}\text{NClO}_4$  ( $\text{MNH}_4^+$ ) 484.2254, found 484.2258. Following the procedure used to form **17**, the previously prepared branched Meldrum's acid (300 mg, 0.64 mmol) was heated in THF (2.1 mL) and  $\text{H}_2\text{O}$  (1.0 mL), to give, after purification by flash chromatography (13:1 hexanes–EtOAc), 153 mg (62%) of pure **23c** as a white solid: m.p. 103 – 107°C;  $^1\text{H}$  NMR (300 MHz,  $\text{CDCl}_3$ )  $\delta$  7.36 – 7.19 (m, 9H), 6.40 (d,  $J=16.0$  Hz, 1H), 6.34 (d,  $J=17.0$  Hz, 1H), 6.25 – 6.12 (m, 2H), 2.50 – 2.39 (m, 1H), 2.29 – 2.17 (m, 4H), 1.81 – 1.46 (m, 8H);  $^{13}\text{C}$  NMR (75 MHz,  $\text{CDCl}_3$ )  $\delta$  182.8, 137.6, 136.1, 132.4, 131.0, 130.2, 129.1, 128.5, 127.1, 126.9, 125.9, 45.3, 32.8, 31.6, 29.7, 26.9; IR (film)  $\nu$  3028, 2933, 2856, 1699, 1487, 1090,

962  $\text{cm}^{-1}$ ; MS (EI)  $m/z$  382 (40) [ $\text{M}^+$ ], 177 (44), 143 (92), 117 (100); HRMS (EI) calcd for  $\text{C}_{24}\text{H}_{27}\text{ClO}_2$  382.1699, found 382.1704.

**(4*cE*,6*E*)-2-(5*c*-Phenylpent-4*c*-enyl)-7-(*p*-trifluoromethylphenyl)hept-6-enoic acid (23d).** Following the procedure used to form **16**, **22d** (600 mg, 2.6 mmol) was treated with  $\text{I}_2$  (660 mg, 2.6 mmol),  $\text{PPh}_3$  (680 mg, 2.6 mmol) and imidazole (210 mg, 3.1 mmol) in  $\text{CH}_2\text{Cl}_2$  (35 mL) to give, after purification by flash chromatography (49:1 hexanes–EtOAc), 840 mg (95 %) of pure iodide as a colorless oil:  $^1\text{H}$  NMR (300 MHz,  $\text{CDCl}_3$ )  $\delta$  7.56 (d,  $J=8.0$  Hz, 2H), 7.43 (d,  $J=8.0$  Hz, 2H), 6.50 (d,  $J=16.0$  Hz, 1H), 6.28 (dt,  $J=16.0$ , 7.0 Hz, 1H) 3.24 (t,  $J=7.0$  Hz, 2H), 2.37 (q,  $J=7.0$  Hz, 2H), 2.02 (qn,  $J=7.0$  Hz, 2H);  $^{13}\text{C}$  NMR (75 MHz,  $\text{CDCl}_3$ )  $\delta$  140.9, 131.2, 130.1, 128.6, 126.4, 126.2, 125.5, 122.5, 33.6, 32.6, 6.2; IR (film)  $\nu$  3024, 2935, 2838, 1616, 1165, 1122  $\text{cm}^{-1}$ ; MS (EI)  $m/z$  340 (39) [ $\text{M}^+$ ], 185 (32), 159 (18), 84 (100); HRMS (EI) calcd for  $\text{C}_{12}\text{H}_{12}\text{F}_3\text{I}$  339.9936, found 339.9938. Following the procedure used to form **16**, the previously prepared iodide (800 mg, 2.3 mmol) was treated with  $\text{Cs}_2\text{CO}_3$  (1.86 g, 5.7 mmol) and **20** (557 mg, 1.9 mmol) in MeCN (5 mL) to give, after purification by flash chromatography (19:1 hexanes–EtOAc), 426 mg (45%) of pure branched Meldrum's acid as a colorless oil:  $^1\text{H}$  NMR (300 MHz,  $\text{CDCl}_3$ )  $\delta$  7.54 (d,  $J=8.0$  Hz, 2H), 7.41 (d,  $J=8.0$  Hz, 2H), 7.35 – 7.20 (m, 5H), 6.40 (d,  $J=16.0$  Hz, 1H), 6.37 (d,  $J=15.5$  Hz, 1H), 6.22 (dt,  $J=15.5$ , 7.0 Hz, 1H), 6.12 (dt  $J=16.0$ , 7.0 Hz, 1H), 2.23 (qn,  $J=7.0$  Hz, 4H), 2.10 – 2.04 (m, 4H), 1.74 (s, 6H), 1.55 – 1.43 (m, 4H). Following the procedure used to form **17**, the previously prepared branched Meldrum's acid (426 mg, 0.85 mmol) was heated in THF (3.0 mL) and  $\text{H}_2\text{O}$  (1.5 mL), to give, after purification by flash chromatography (9:1 hexanes–EtOAc), 100 mg (28%) of pure **23d** as a white solid: m.p. 89 – 92°C;  $^1\text{H}$  NMR (300 MHz,  $\text{CDCl}_3$ )  $\delta$  7.53 (d,  $J=8.0$  Hz, 2H), 7.40 (d,  $J=8.0$  Hz, 2H), 7.35 – 7.20 (m, 5H), 6.44 – 6.16 (m, 4H), 2.51 – 2.29 (m, 1H), 2.32 – 2.18 (m, 4H), 1.71 – 1.50 (m, 8H);  $^{13}\text{C}$  NMR (75 MHz,  $\text{CDCl}_3$ )  $\delta$  182.3, 141.1, 137.6, 133.0, 130.2, 130.1, 129.1, 128.9, 128.5, 126.9, 126.0, 125.9, 125.4, 122.4, 45.2, 32.8, 31.6, 27.0, 26.8; IR (film)  $\nu$  3033, 2931, 2860, 1703, 1319, 1160, 1116, 1068  $\text{cm}^{-1}$ ; MS (EI)  $m/z$  416 (100) [ $\text{M}^+$ ], 211 (40), 143 (36), 117 (70); HRMS (EI) calcd for  $\text{C}_{25}\text{H}_{27}\text{F}_3\text{O}_2$  416.1963, found 416.1959.

**(4*E*,6*E*)-7-(*p*-Nitrophenyl)-2-(5-phenylpent-4-enyl)hept-6-enoic acid (23e).** Following the procedure used to form **16**, **22e** (800 mg, 3.9 mmol) was treated with I<sub>2</sub> (1.0 g, 3.9 mmol), PPh<sub>3</sub> (1.01 mg, 3.9 mmol) and imidazole (320 mg, 4.7 mmol) in CH<sub>2</sub>Cl<sub>2</sub> (10 mL) to give, after purification by flash chromatography (32:1 hexanes–EtOAc), 1.03 g (82 %) of pure iodide as a yellow oil: <sup>1</sup>H NMR (300 MHz, CDCl<sub>3</sub>) δ 8.15 (d, *J*=9.0 Hz, 2H), 7.45 (d, *J*=9.0 Hz, 2H), 6.52 (d, *J*=16.0 Hz, 1H), 6.37 (dt, *J*=16.0, 7.0 Hz, 1H), 3.23 (t, *J*=7.0 Hz, 2H), 2.40 (q, *J*=7.0 Hz, 2H), 2.02 (qn, *J*=7.0 Hz, 2H); <sup>13</sup>C NMR (75 MHz, CDCl<sub>3</sub>) δ 146.6, 143.8, 133.7, 129.5, 126.4, 124.0, 33.7, 32.3, 5.9; IR (film) ν 3077, 3033, 2931, 2838, 1593, 1514, 1341 cm<sup>-1</sup>; MS (EI) *m/z* 317 (32) [M<sup>+</sup>], 155 (14), 116 (100); HRMS (EI) calcd for C<sub>11</sub>H<sub>12</sub>NO<sub>2</sub>I 316.9913, found 316.9920. Following the procedure used to form **16**, the previously prepared iodide (1.00 g, 3.2 mmol) was treated with Cs<sub>2</sub>CO<sub>3</sub> (1.8 g, 5.4 mmol) and **20** (780 mg, 2.7 mmol) in MeCN (4 mL) to give, after purification by flash chromatography (19:1 hexanes–EtOAc), 890 mg (77 %) of pure branched Meldrum's acid as a yellow oil: <sup>1</sup>H NMR (300 MHz, CDCl<sub>3</sub>) δ 8.14 (d, *J*=9.0 Hz, 2H), 7.44 (d, *J*=9.0 Hz, 2H), 7.34-7.17 (m, 5H), 6.49-6.27 (m, 3H), 6.11 (dt, *J*=16.0 Hz, 7.0 Hz, 1H), 2.30-2.18 (m, 4H), 2.09-2.03 (m, 4H), 1.74 (s, 6H), 1.56-1.43 (m, 4H); <sup>13</sup>C NMR (75 MHz, CDCl<sub>3</sub>) δ 169.3, 146.6, 143.8, 137.3, 134.2, 131.0, 129.2, 128.8, 128.5, 127.1, 126.5, 126.0, 124.0, 123.5, 105.7, 54.5, 38.8, 38.6, 32.7, 29.9, 29.8, 25.2, 24.9; IR (film) ν 3028, 2997, 2936, 2860, 1774, 1739, 1597, 1518, 1346, 1266, 1204, 970, 909, 732 cm<sup>-1</sup>; MS (EI) *m/z* 495 (20) [MNH<sub>4</sub><sup>+</sup>], 448 (15), 420 (27), 376 (100), 358 (30), 346 (16), 189 (20), 130 (28); HRMS (CI) calcd for C<sub>28</sub>H<sub>35</sub>N<sub>2</sub>O<sub>6</sub> (MNH<sub>4</sub><sup>+</sup>) 495.2495, found 495.2487. Following the procedure used to form **17**, the previously prepared branched Meldrum's acid (750 mg, 1.7 mmol) was heated in THF (5.5 mL) and H<sub>2</sub>O (2.7 mL), to give, after purification by flash chromatography (9:1 hexanes–EtOAc), 400 mg (61 %) of pure **23e** as a yellow solid: m.p. 84 – 86°C; <sup>1</sup>H NMR (300 MHz, CDCl<sub>3</sub>) δ 8.14 (d, *J*=9.0 Hz, 2H), 7.43 (d, *J*=9.0 Hz, 2H), 7.34-7.19 (m, 5H), 6.47-6.35 (m, 3H), 6.18 (dt, *J*=16.0 Hz, 7.0 Hz, 1H), 2.44-2.41 (m, 1H), 2.31-2.20 (m, 4H), 1.78-1.47 (m, 8H); <sup>13</sup>C NMR (75 MHz, CDCl<sub>3</sub>) δ 182.7, 146.4, 144.2, 137.6, 135.6, 130.3, 130.1, 128.5, 126.9, 126.4, 126.0, 123.9, 45.3, 33.0, 32.8, 31.6, 27.0, 26.7; IR (film) ν 3024, 2935 (br), 2856, 1699,

1509, 1341, 966, 728, 697  $\text{cm}^{-1}$ ; MS (EI)  $m/z$  393 (15) [ $\text{M}^+$ ], 143 (25), 117 (100), 91 (48); HRMS (EI) calcd for  $\text{C}_{24}\text{H}_{27}\text{NO}_4$  393.1940, found 393.1945.

**(E)-7-(*p*-Methoxyphenyl)-1-(5*o*-phenylpent-4-enyl)bicyclo[3.1.1]heptan-6-one (24a) and (E)-1-[5*o*-(*p*-methoxyphenyl)pent-4-enyl]-7-phenylbicyclo[3.1.1]heptan-6-one (25a).** Following the procedure used to form **5**, **23a** (50 mg, 0.13 mmol) was treated with oxalyl chloride (50  $\mu\text{L}$ , 0.65 mmol) in toluene (1 mL) then with  $\text{Et}_3\text{N}$  (110  $\mu\text{L}$ , 0.8 mol) in toluene (3 mL) to give a 3.2:1.0 mixture of **24a** and **25a** determined by  $^1\text{H}$  NMR on the crude material. After purification by flash chromatography (19:1 hexanes–EtOAc), 9 mg (20 %) an inseparable mixture of **24a** and **25a** was obtained as a colorless oil:  $^1\text{H}$  NMR (300 MHz,  $\text{CDCl}_3$ )  $\delta$  7.29–7.12 (m, 5H), 7.06 (d,  $J=9.0$  Hz, 2H), 6.81 (d,  $J=9.0$  Hz, 2H), 6.21 (d,  $J=16.0$  Hz, 1H), 5.92 (dt,  $J=15.5$  Hz, 7.0 Hz, 1H), 3.80 (s, 3H, 25a), 3.75 (s, 3H, 24a), 3.17 (t,  $J=3.5$  Hz, 1H, 25a), 3.12 (t,  $J=3.5$  Hz, 1H, 24a), 3.04 (s, 1H, 25a), 3.00 (s, 1H, 24a), 2.53–2.42 (m, 3H), 2.28–2.19 (m, 1H), 2.02–1.83 (m, 3H), 1.76–1.63 (m, 1H), 1.47–1.38 (m, 1H), 1.29–1.08 (m, 3H) ;  $^{13}\text{C}$  NMR (75 MHz,  $\text{CDCl}_3$ )  $\delta$  216.2, 158.3, 137.7, 132.1, 130.2, 130.0, 129.3, 128.4, 127.5, 126.9, 126.7, 125.8, 113.8, 70.5, 60.6, 55.1, 47.2, 40.0, 34.6, 33.1, 28.8, 22.9, 22.7, 18.4; IR (film)  $\nu$  2935, 2860, 1770, 1514, 1249, 1028  $\text{cm}^{-1}$ ; MS (EI)  $m/z$  360 (45) [ $\text{M}^+$ ], 269 (17), 229 (25), 199 (47), 160 (50), 148 (75), 121 (100), 91 (48); HRMS (EI) calcd for  $\text{C}_{25}\text{H}_{28}\text{O}_2$  360.2089, found 360.2095.

**(E)-1-(5*o*-Phenylpent-4-enyl)-7-(*p*-tolyl)bicyclo[3.1.1]heptan-6-one (24b) and (E)-7-phenyl-1-(5*o*-(*p*-tolyl)pent-4-enyl)bicyclo[3.1.1]heptan-6-one (25b).** Following the procedure used to form **5**, **23b** (180 mg, 0.50 mmol) was treated with oxalyl chloride (220  $\mu\text{L}$ , 2.5 mmol) in toluene (2 mL) then with  $\text{Et}_3\text{N}$  (420  $\mu\text{L}$ , XX mol) in toluene (10 mL) to give a 2.4:1.0 mixture of **24b** and **25b** determined by  $^1\text{H}$  NMR on the crude material. After purification by flash chromatography (19:1 hexanes–EtOAc), 141 mg (82 %) an inseparable mixture of **24b** and **25b** was obtained as a colorless oil:  $^1\text{H}$  NMR (300 MHz,  $\text{CDCl}_3$ )  $\delta$  7.31 – 7.03 (m, 9H), 6.22 (d,  $J=16.0$  Hz, 1H **24b**), 6.19 (d,  $J=16.0$  Hz, 1H **25b**), 5.98 – 5.84 (m, 2H), 3.18 (t,  $J=3.5$  Hz, 1H **25b**), 3.15 (t,  $J=3.5$  Hz, 1H **24b**), 3.06 (s, 1H **25b**), 3.02 (s, 1H **24b**), 2.55 – 2.43 (m, 3H), 2.33 (s, 3H **25b**), 2.30 (s, 3H **24b**), 2.29 – 2.21 (m., 1H), 2.04 – 1.85 (m, 3H), 1.80 –

1.65 (m, 1H), 1.51 – 1.09 (m, 4H);  $^{13}\text{C}$  NMR (75 MHz,  $\text{CDCl}_3$ )  $\delta$  216.2, 216.0, 140.2, 137.8, 137.0, 136.4, 136.2, 134.9, 130.3, 130.0, 129.8, 129.2, 129.0, 128.5, 128.4, 127.4, 126.7, 125.8, 70.7, 70.5, 60.4, 48.1, 47.7, 40.1, 34.7, 33.1, 28.9, 22.8, 21.0, 18.4; IR (film)  $\nu$  3024, 2939, 2865, 1765, 1518, 1447, 970, 732, 692  $\text{cm}^{-1}$ ; MS (EI)  $m/z$  344 (74) [ $\text{M}^+$ ], 253 (14), 239 (18), 183 (53), 144 (61), 132 (100); HRMS (EI) calcd for  $\text{C}_{25}\text{H}_{28}\text{O}$  344.2140, found 344.2133.

**(*E*)-7-(*p*-Chlorophenyl)-1-(5*ċ*-phenylpent-4*ċ*-enyl)bicyclo[3.1.1]heptan-6-one (24c) and (*E*)-1-[5*ċ*-(*p*-chlorophenyl)pent-4*ċ*-enyl]-7-phenylbicyclo[3.1.1]heptan-6-one (25c).** Following the procedure used to form **5**, **23c** (85 mg, 0.22 mmol) was treated with oxalyl chloride (100  $\mu\text{L}$ , 1.1 mmol) in toluene (2 mL) then with  $\text{Et}_3\text{N}$  (190  $\mu\text{L}$ , XX mol) in toluene (10 mL) to give a 1.0:1.3 mixture of **24c** and **25c** determined by  $^1\text{H}$  NMR on the crude material. After purification by flash chromatography (19:1 hexanes– $\text{EtOAc}$ ), 47 mg (56 %) an inseparable mixture of **24c** and **25c** was obtained as a colorless oil:  $^1\text{H}$  NMR (300 MHz,  $\text{CDCl}_3$ )  $\delta$  7.36 – 7.06 (m, 9H), 6.22 (d,  $J=15.5$  Hz, 1H **25c**), 6.14 (d,  $J=16.0$  Hz, 1H, **24c**), 5.95 – 5.81 (m, 2H), 3.17 (t,  $J=3.5$  Hz, 1H **25c**), 3.12 (t,  $J=3.5$  Hz, 1H **24c**), 3.05 (s, 1H **25c**), 3.02 (s, 1H **24c**), 2.54 – 2.43 (m, 3H), 2.29 – 2.21 (m, 1H), 2.01 – 1.64 (m, 4H), 1.50 – 1.09 (m, 4H);  $^{13}\text{C}$  NMR (75 MHz,  $\text{CDCl}_3$ )  $\delta$  216.0, 215.5, 140.1, 138.8, 137.6, 136.2, 132.5, 132.3, 131.0, 130.2, 130.0, 128.8, 128.6, 128.4, 127.5, 127.1, 126.8, 126.7, 125.8, 70.8, 70.6, 60.6, 60.4, 48.0, 47.4, 40.0, 35.6, 33.1, 28.8, 22.7, 18.3; IR (film)  $\nu$  3033, 2937, 2860, 1770, 1483, 1452, 1085, 970, 842, 736, 697  $\text{cm}^{-1}$ ; MS (EI)  $m/z$  364 (47) [ $\text{M}^+$ ], 273 (12), 239 (20), 200 (35), 169 (70), 130 (100); HRMS (EI) calcd for  $\text{C}_{24}\text{H}_{25}\text{ClO}$  364.1594, found 364.1601.

**(*E*)-1-(5*ċ*-Phenylpent-4*ċ*-enyl)-7-(*p*-trifluoromethylphenyl)bicyclo[3.1.1]heptan-6-one (24d) and (*E*)-7-phenyl-1-[5*ċ*-(*p*-trifluoromethylphenyl)pent-4*ċ*-enyl]bicyclo[3.1.1]heptan-6-one (25d).** Following the procedure used to form **5**, **23d** (42 mg, 0.1 mmol) was treated with oxalyl chloride (44  $\mu\text{L}$ , 0.5 mmol) in toluene (1 mL) then with  $\text{Et}_3\text{N}$  (84  $\mu\text{L}$ , 0.6 mol) in toluene (2 mL) to give a 1.0:4.1 mixture of **24d** and **25d** determined by  $^1\text{H}$  NMR on the crude material. After purification by flash chromatography (19:1 hexanes– $\text{EtOAc}$ ), 15 mg (38 %) an inseparable mixture of **24d** and **25d** was obtained as a colorless

oil:  $^1\text{H}$  NMR (300 MHz,  $\text{CDCl}_3$ )  $\delta$  7.55-7.49 (m, 2H), 7.39-7.12 (m, 7H), 6.21 (d,  $J=15.5$  Hz, 1H), 5.97 (dt,  $J=16.0$  Hz, 7.5 Hz, 1H), 3.18 (t,  $J=3.5$  Hz, 2H), 3.11 (s, 1H 24c), 3.04 (s, 1H 25c), 2.55-2.43 (m, 3H), 2.31-2.22 (m, 1H), 2.04-1.88 (m, 3H), 1.80-1.33 (m, 2H), 1.30-1.08 (m, 3H);  $^{13}\text{C}$  NMR (75 MHz,  $\text{CDCl}_3$ )  $\delta$  216.0, 141.1, 140.1, 133.1, 129.9, 128.9, 128.4, 127.9, 127.5, 126.8, 126.7, 126.0, 125.8, 125.3, 70.5, 60.4, 48.0, 47.9, 40.1, 34.6, 33.1, 29.7, 28.8, 22.8, 22.5, 18.3; IR (film)  $\nu$  3098, 2935, 2865, 1761, 1615, 1319, 1165, 1121, 1068  $\text{cm}^{-1}$ ; MS (EI)  $m/z$  398 (24) [ $\text{M}^+$ ], 169 (41), 129 (67), 118 (100), 91 (54); HRMS (EI) calcd for  $\text{C}_{25}\text{H}_{25}\text{F}_3\text{O}_2$  398.1857, found 398.1865.

**(*E*)-7-(*p*-Nitrophenyl)-1-(5*c*-phenylpent-4*c*-enyl)bicyclo[3.1.1]heptan-6-one (24e) and (*E*)-1-[5*c*-(*p*-nitrophenyl)pent-4*c*-enyl]-7-phenylbicyclo[3.1.1]heptan-6-one (25e).** Following the procedure used to form **5**, **23e** (210 mg, 0.53 mmol) was treated with oxalyl chloride (230  $\mu\text{L}$ , 2.6 mmol) in toluene (2 mL) then with  $\text{Et}_3\text{N}$  (450  $\mu\text{L}$ , 3.2 mol) in toluene (10 mL) to give a 1.0:9.0 mixture of **24e** and **25e** determined by  $^1\text{H}$  NMR on the crude material. After purification by flash chromatography (19:1 hexanes–EtOAc), 12 mg (6 %) of **24e** and 116 mg (58 %) of **25e** were obtained as a yellow oil. **24e**:  $^1\text{H}$  NMR (300 MHz,  $\text{CDCl}_3$ )  $\delta$  7.32 – 7.16 (m, 9H), 6.18 (d,  $J=15.5$  Hz, 1H), 5.85 (dt,  $J=15.5$ , 7.0 Hz, 1H), 3.20 – 3.12 (m, 1H), 3.16 (s, 1H), 2.55 – 2.46 (m, 3H), 2.34 – 2.25 (m, 1H), 2.05 – 1.68 (m, 4H), 1.58 – 1.07 (m, 4H); IR (film)  $\nu$  3024, 2933, 2865, 1765, 1597, 1514, 1341, 856, 750, 692  $\text{cm}^{-1}$ ; MS (EI)  $m/z$  375 (13) [ $\text{M}^+$ ], 245 (64), 130 (100), 118 (77), 91 (69); HRMS (EI) calcd for  $\text{C}_{24}\text{H}_{25}\text{NO}_3$  375.1834, found 375.1841. **25e**:  $^1\text{H}$  NMR (300 MHz,  $\text{CDCl}_3$ )  $\delta$  8.12 (d,  $J=8.5$  Hz, 2H), 7.23 – 7.12 (m, 7H), 6.24 (d,  $J=16.0$ , 1H), 6.05 (dt,  $J=16.0$ , 6.5 Hz, 1H), 3.18 – 3.15 (m, 1H), 3.05 (s, 1H), 2.55 – 2.42 (m, 3H), 2.30 – 2.21 (m, 1H), 2.05 – 1.87 (m, 3H), 1.75 – 1.63 (m, 1H), 1.51 – 1.44 (m, 1H), 1.29 – 1.08 (m, 3H);  $^{13}\text{C}$  NMR (75 MHz,  $\text{CDCl}_3$ )  $\delta$  215.9, 146.4, 144.2, 140.1, 136.2, 135.7, 129.2, 128.4, 127.5, 127.2, 126.7, 126.4, 123.8, 123.4, 70.5, 66.4, 48.0, 40.0, 34.6, 33.2, 29.1, 28.8, 22.3, 18.3; IR (film)  $\nu$  3033, 2937, 2865, 1761, 1593, 1518, 1337, 732, 701  $\text{cm}^{-1}$ ; MS (EI)  $m/z$  375 (15) [ $\text{M}^+$ ], 169 (29), 141 (18), 129 (47), 118 (100), 91 (71); HRMS (EI) calcd for  $\text{C}_{24}\text{H}_{25}\text{NO}_3$  375.1834, found 375.1841.

**III  $^1\text{H}$  and  $^{13}\text{C}$ -NMR Spectra of Compounds 2, 5, 7, 8, 10, 11, 14, 16, 17, 19, 20, 22b–25.**

**RMN  $^1\text{H}$  spectrum**

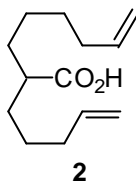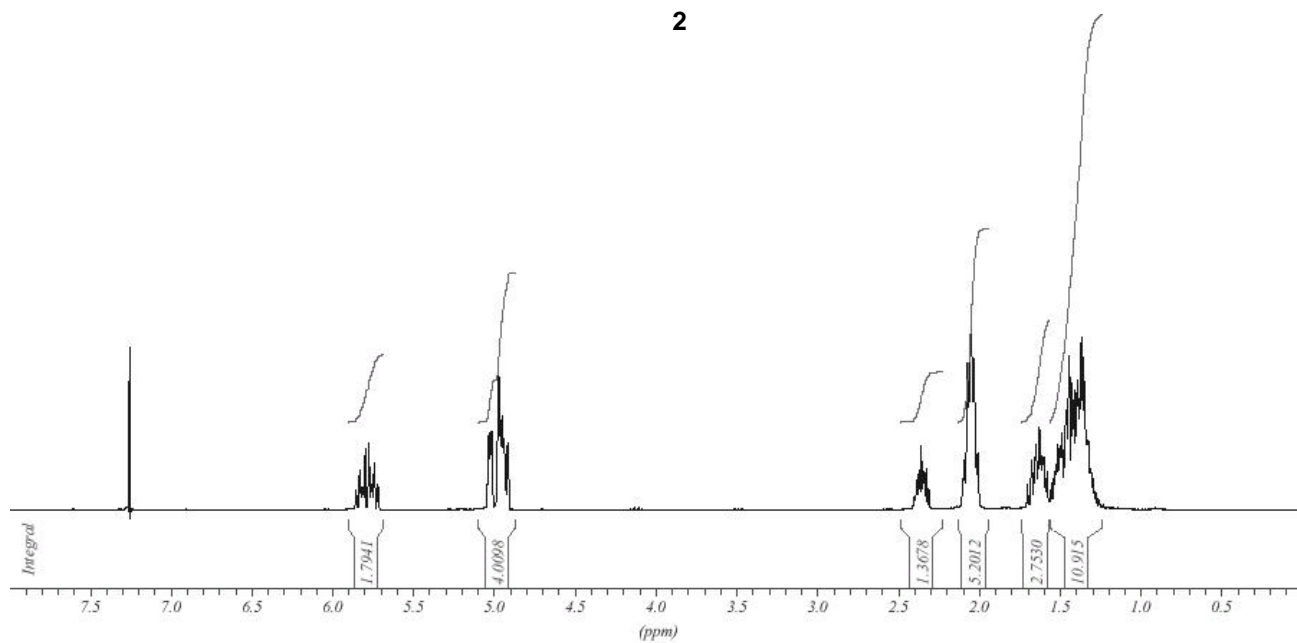

**RMN  $^{13}\text{C}$  spectrum**

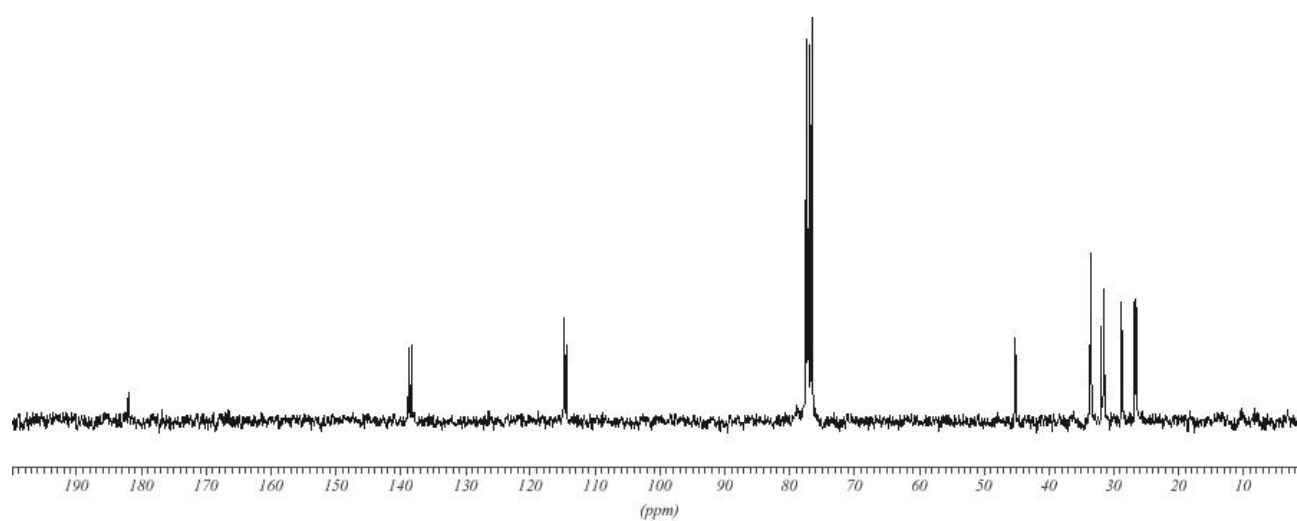



## RMN $^1\text{H}$ spectrum

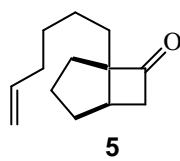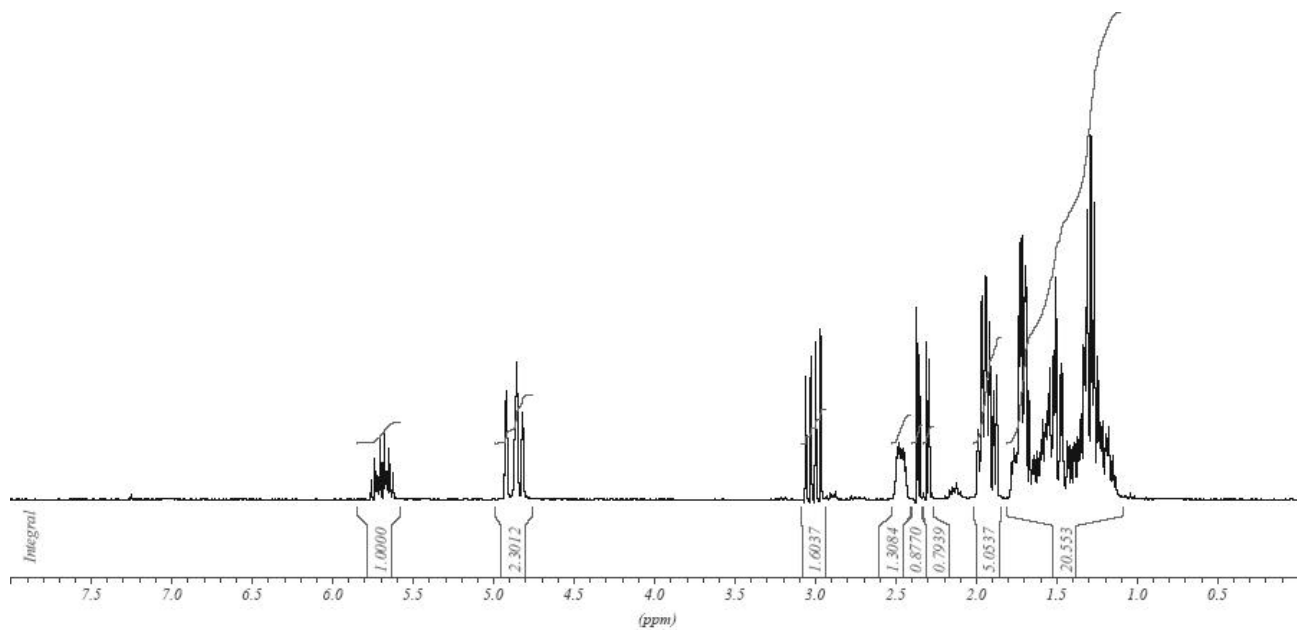

## RMN $^{13}\text{C}$ spectrum

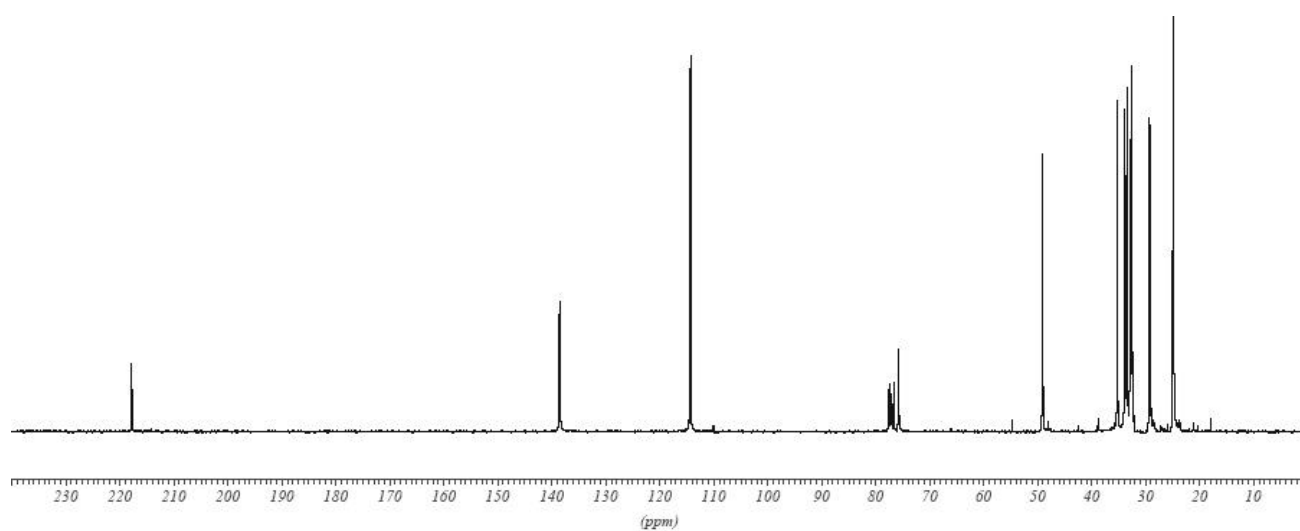

# RMN $^1\text{H}$ spectrum

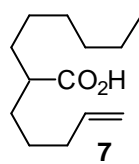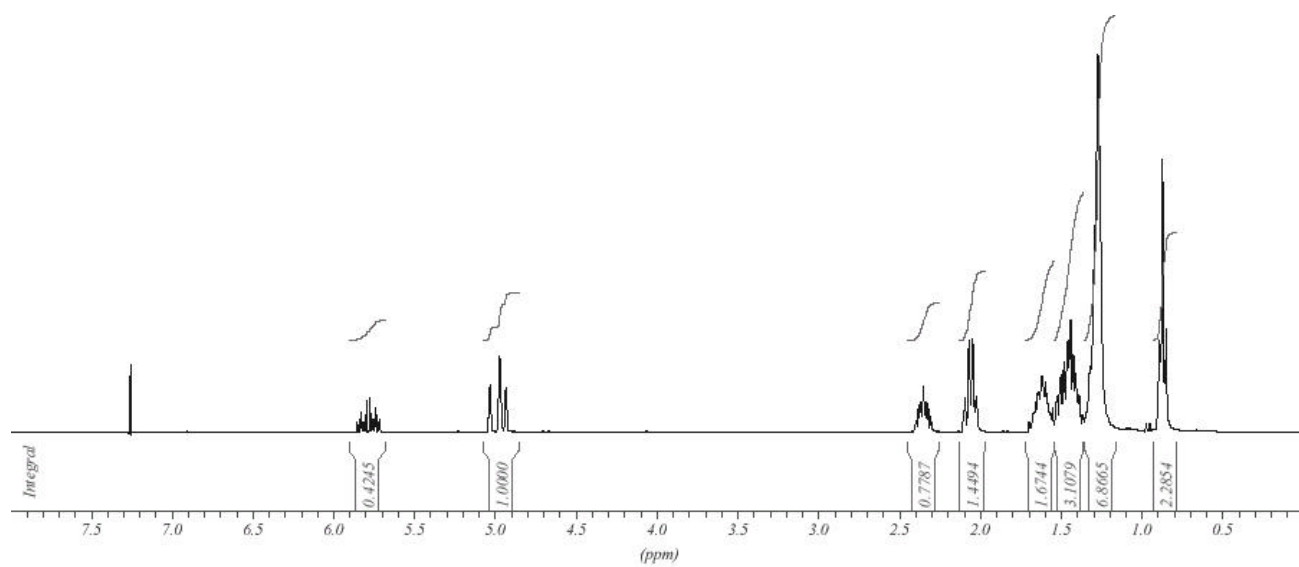

# RMN $^{13}\text{C}$ spectrum

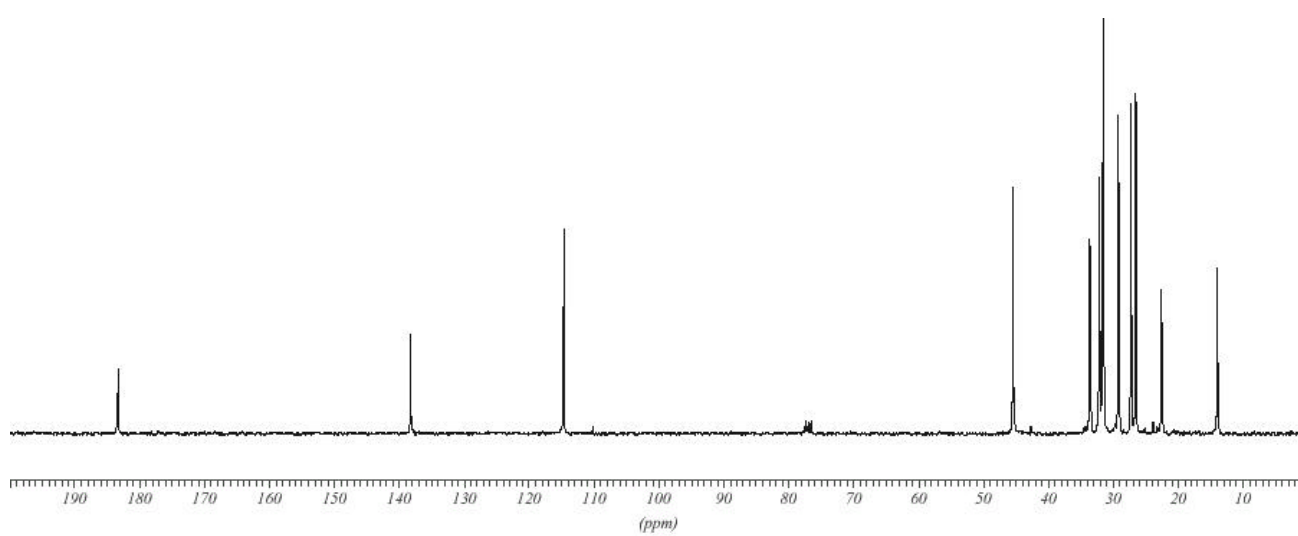

# RMN $^1\text{H}$ spectrum

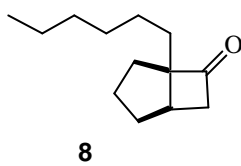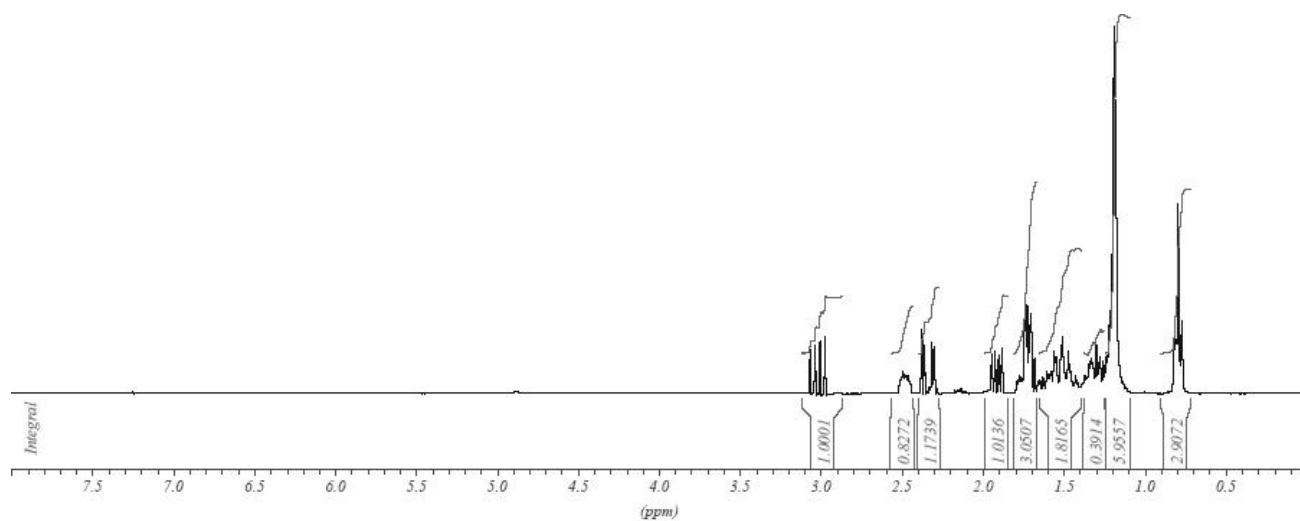

# RMN $^{13}\text{C}$ spectrum

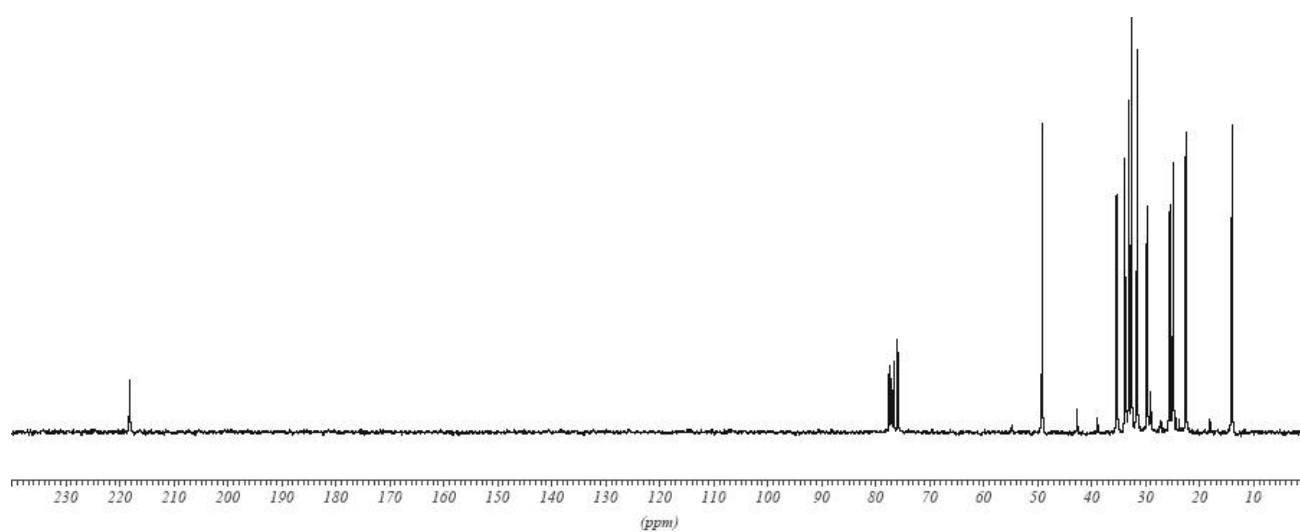

# RMN $^1\text{H}$ spectrum

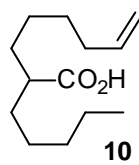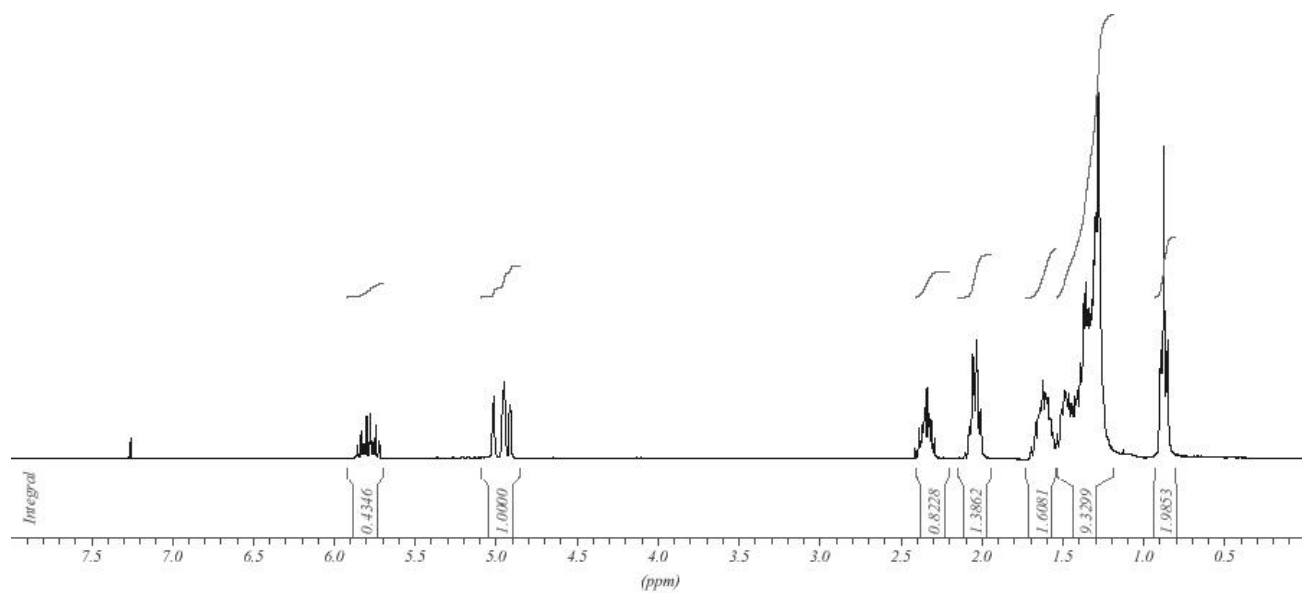

# RMN $^{13}\text{C}$ spectrum

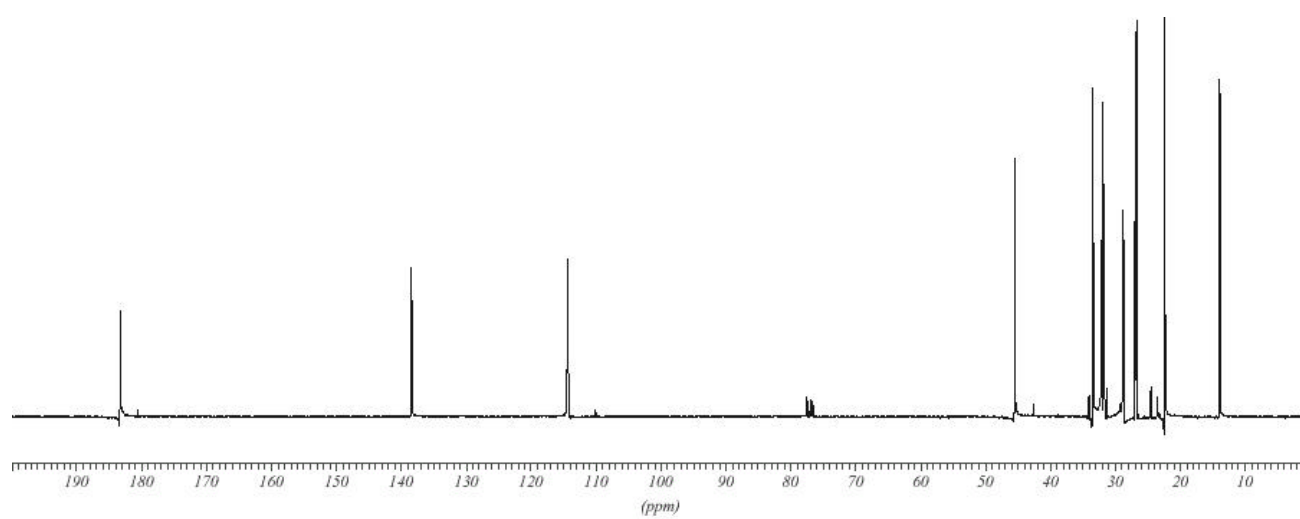

## RMN $^1\text{H}$ spectrum

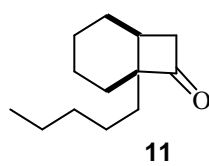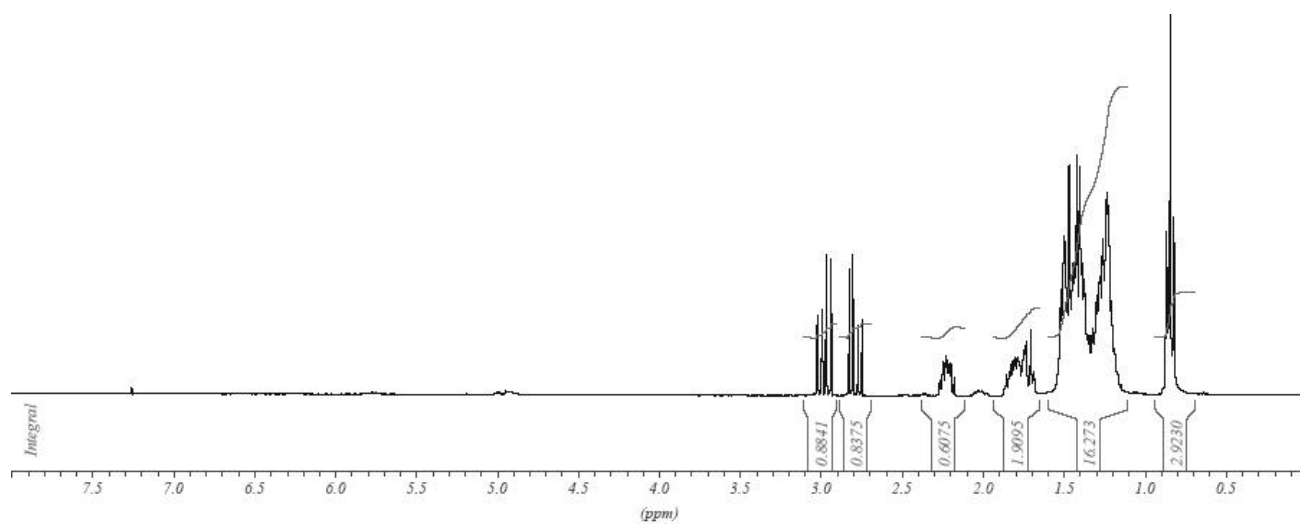

## RMN $^{13}\text{C}$ spectrum

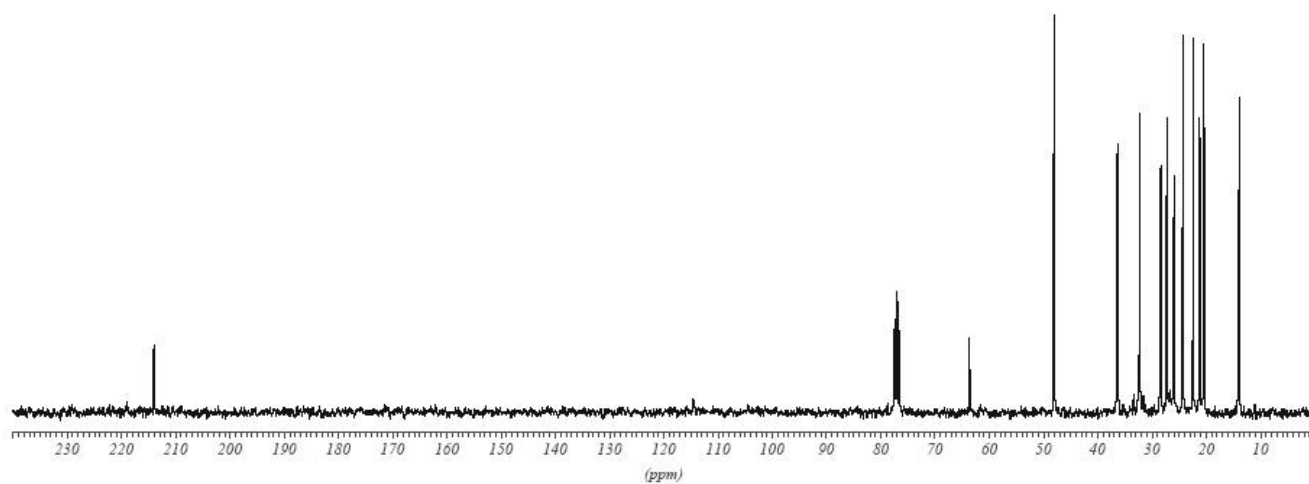

# RMN <sup>1</sup>H spectrum

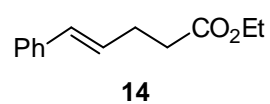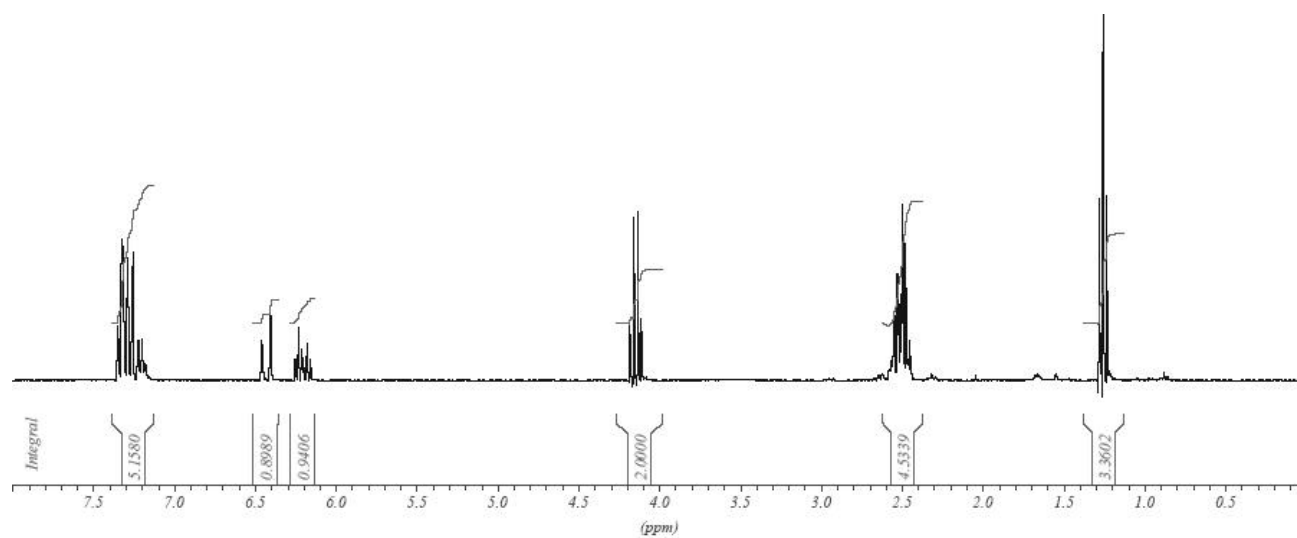

# RMN <sup>13</sup>C spectrum

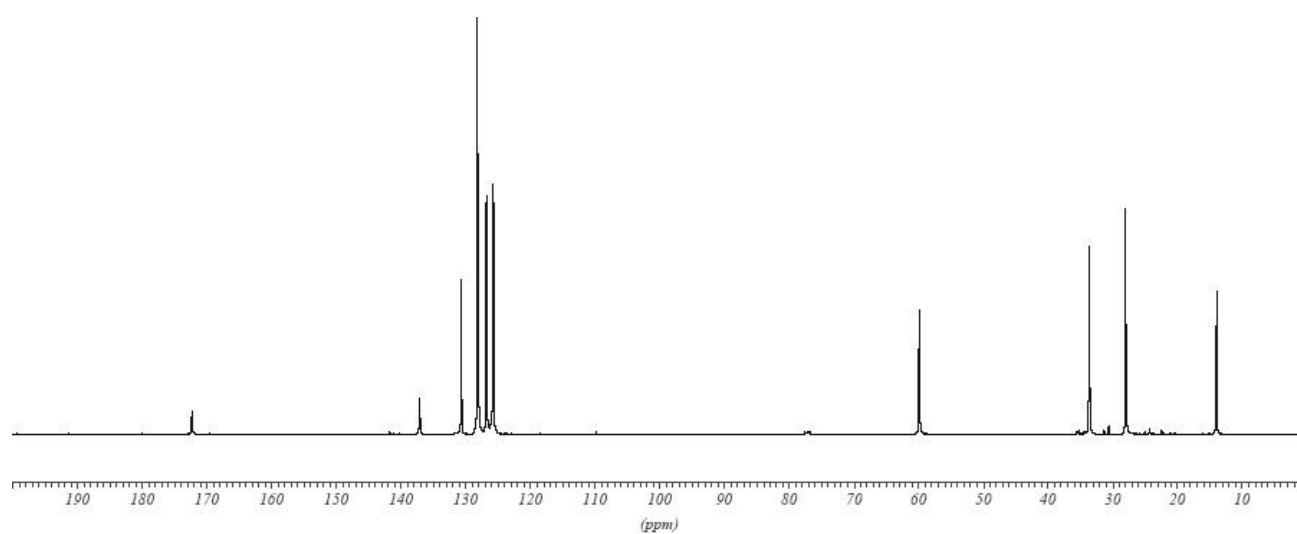

# RMN <sup>1</sup>H spectrum

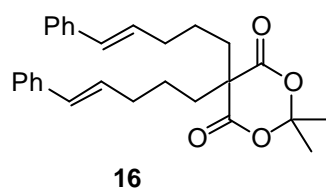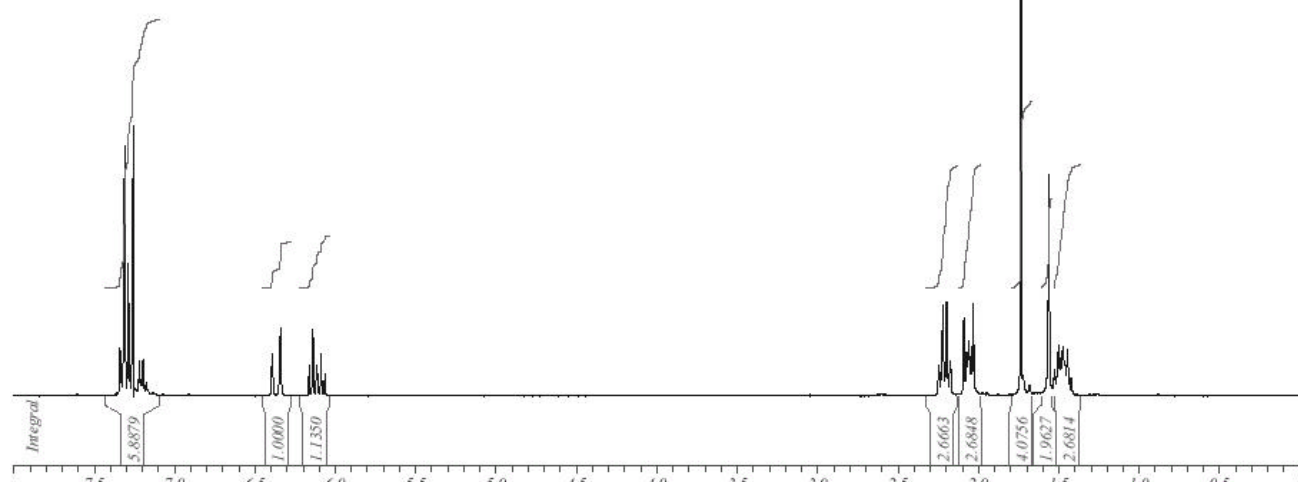

# RMN <sup>13</sup>C spectrum

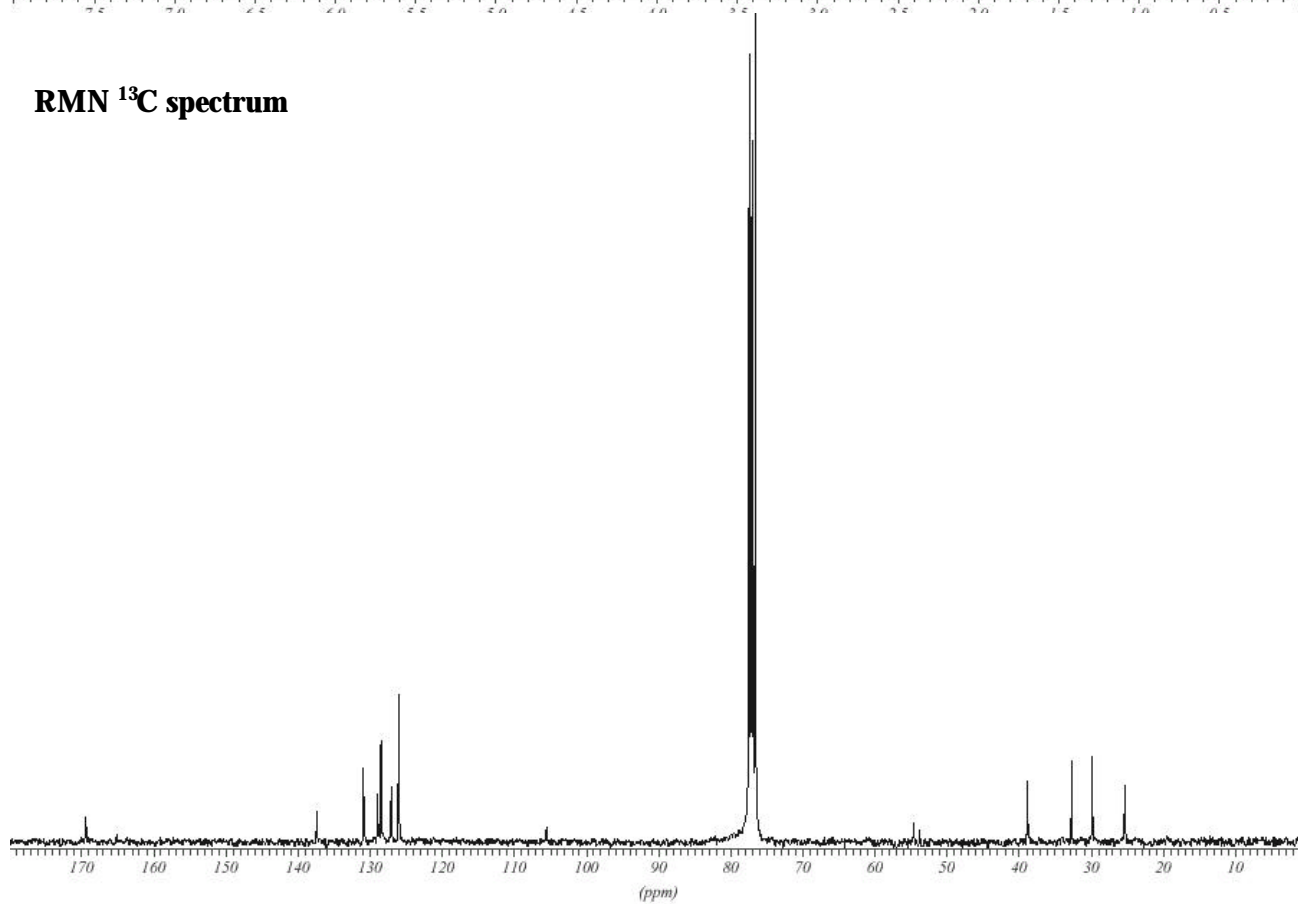

# RMN $^1\text{H}$ spectrum

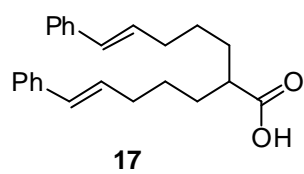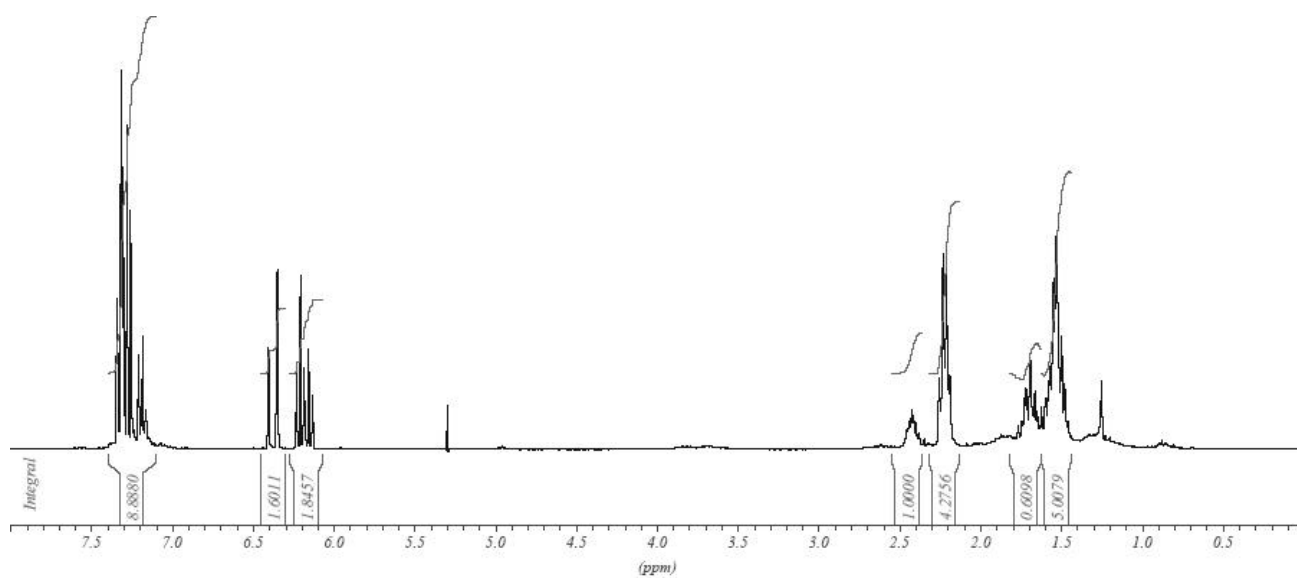

# RMN $^{13}\text{C}$ spectrum

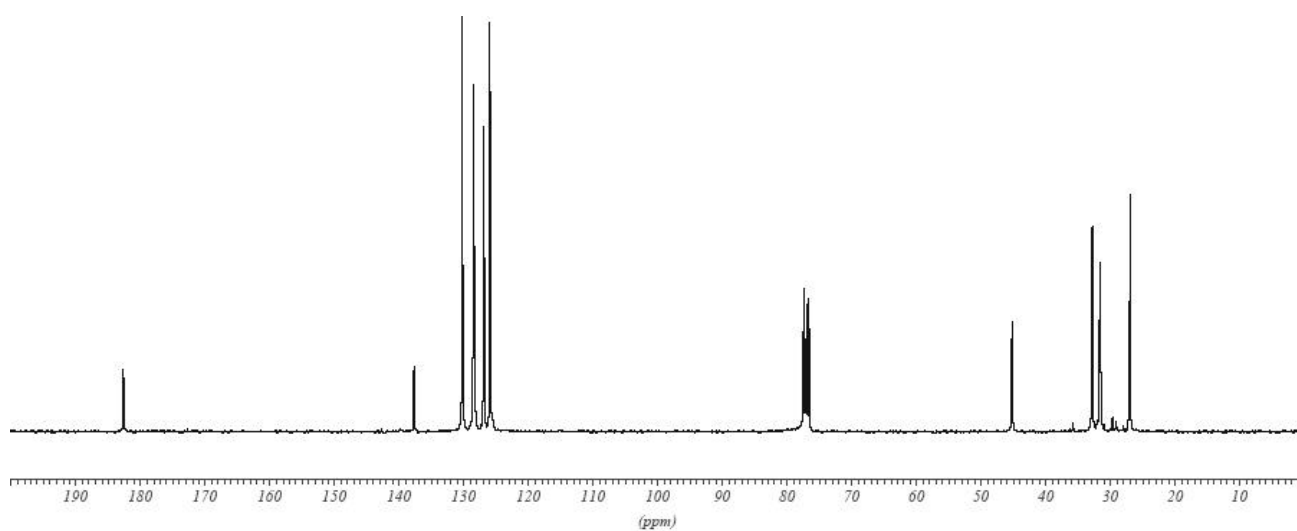



# RMN <sup>1</sup>H spectrum

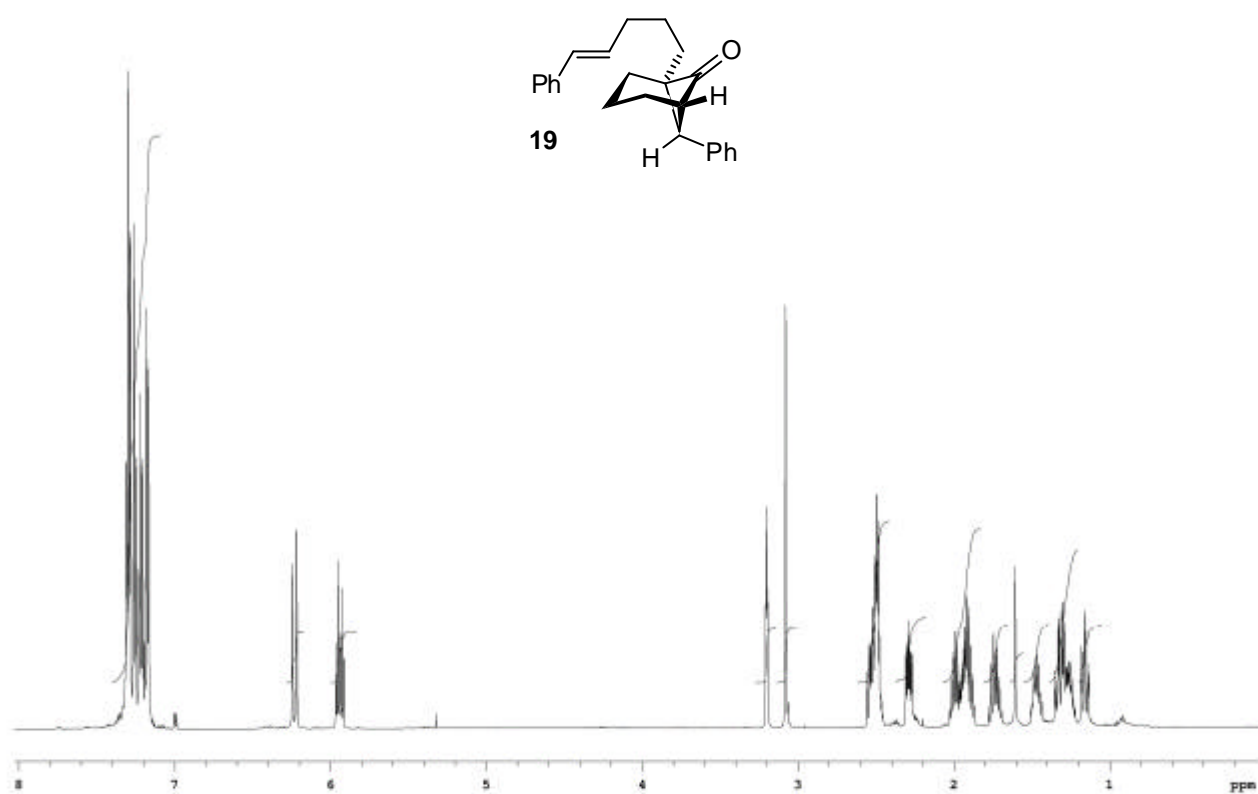

# RMN <sup>13</sup>C spectrum

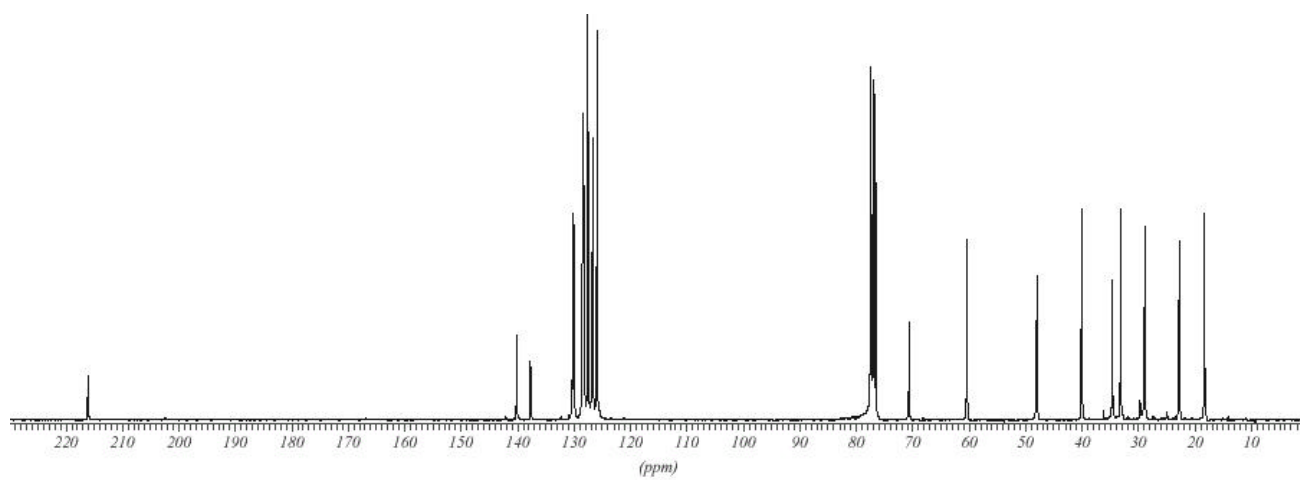

# RMN $^1\text{H}$ spectrum

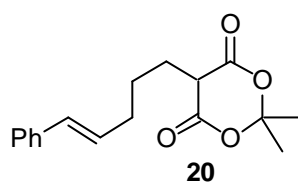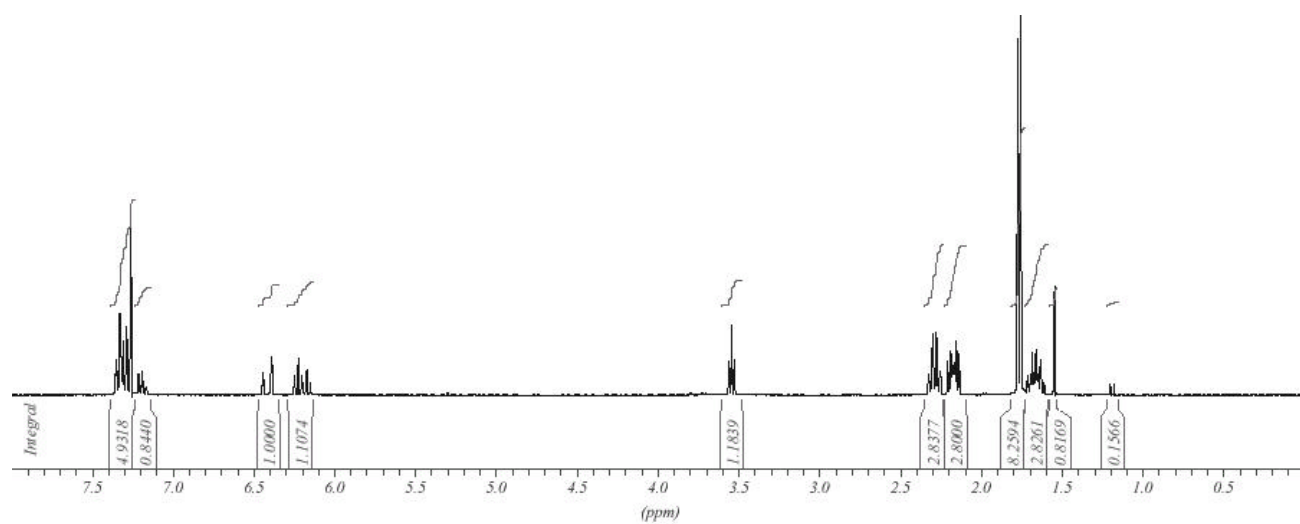

# RMN $^{13}\text{C}$ spectrum

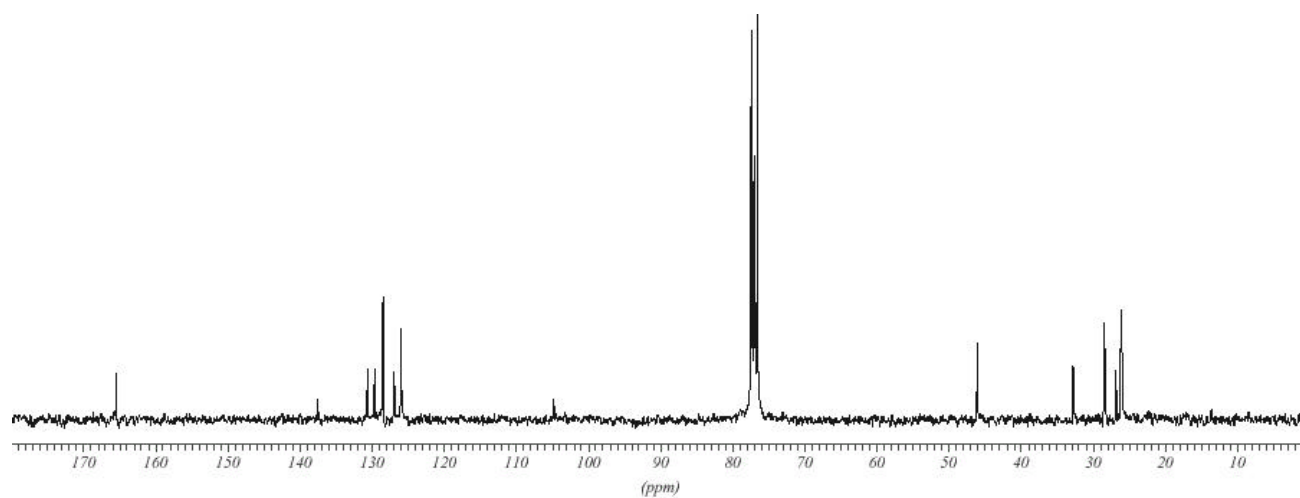

# RMN $^1\text{H}$ spectrum

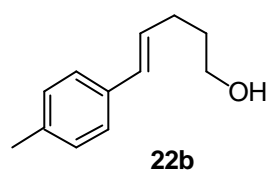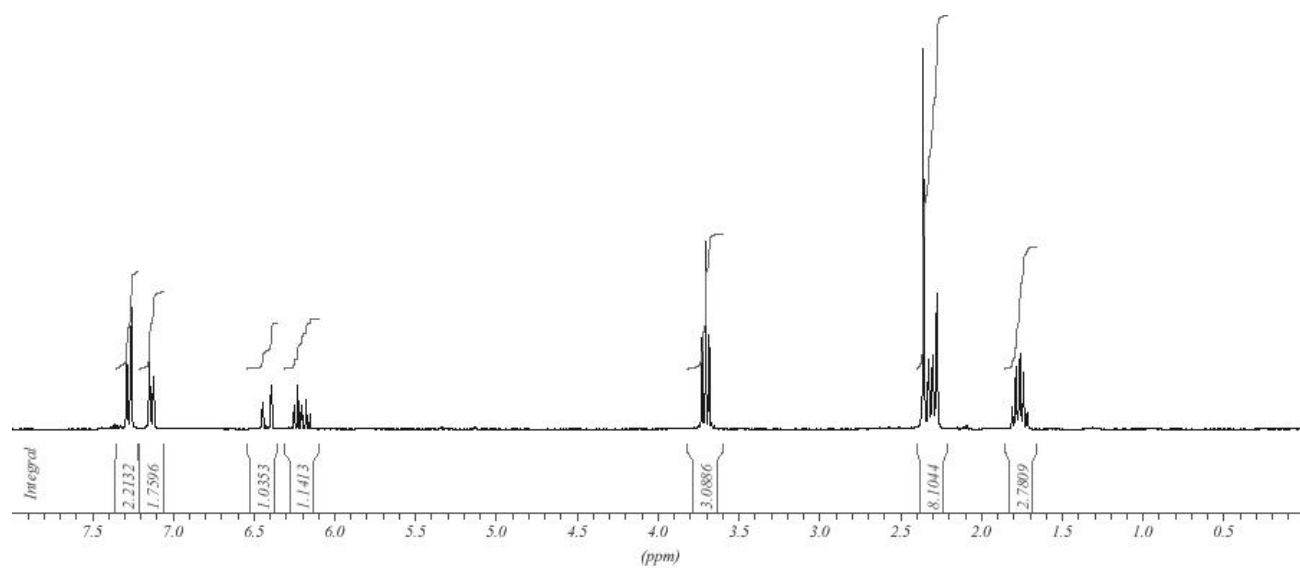

# RMN $^{13}\text{C}$ spectrum

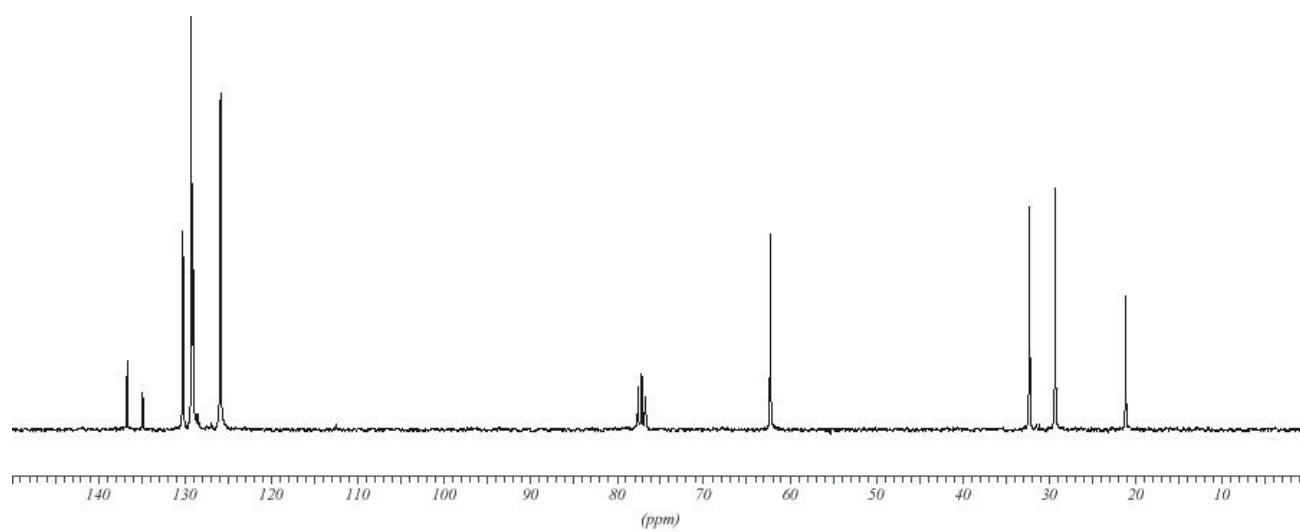

# RMN <sup>1</sup>H spectrum

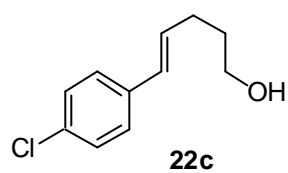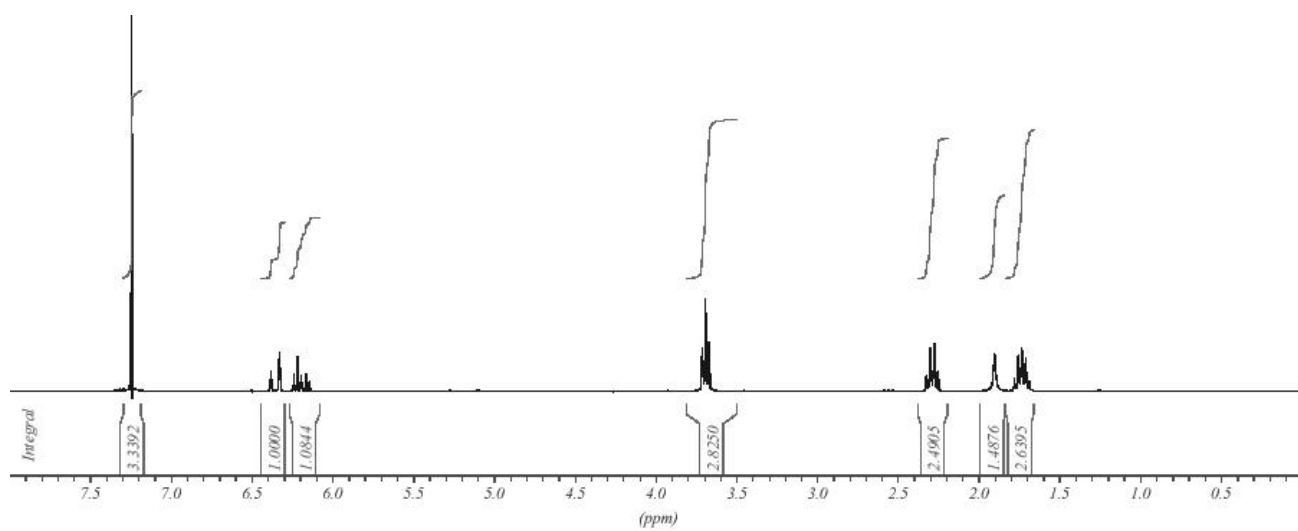

# RMN <sup>13</sup>C spectrum

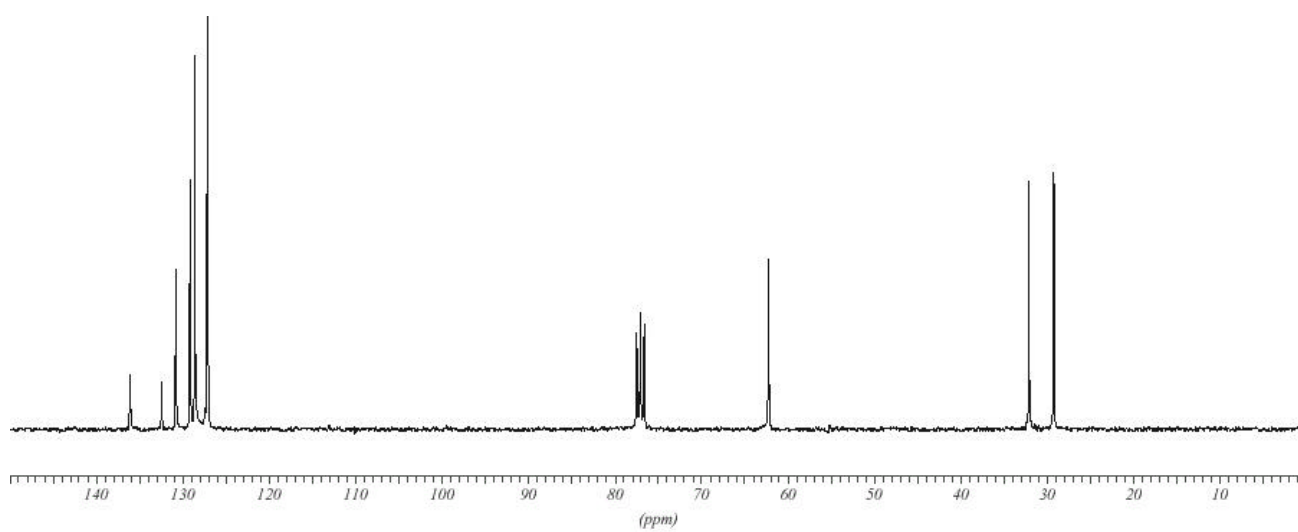

## RMN $^1\text{H}$ spectrum

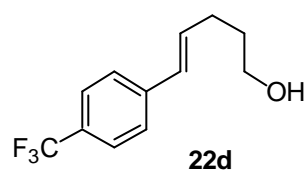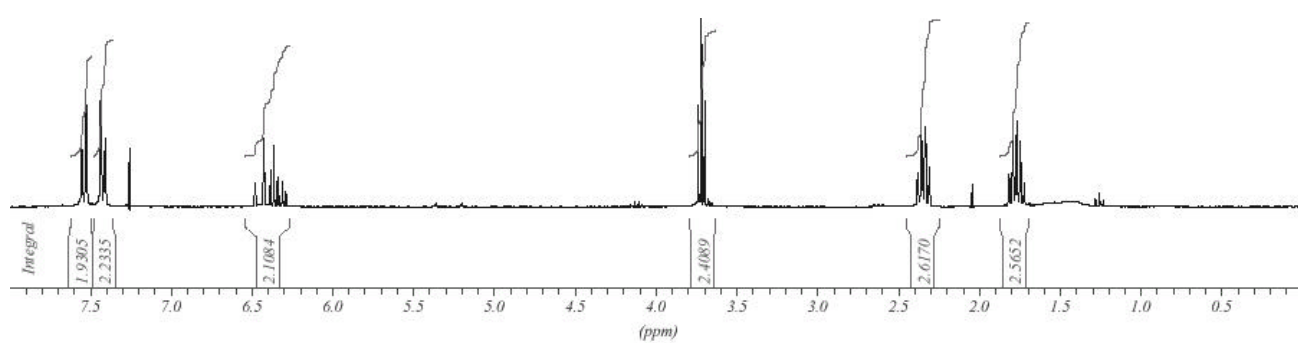

## RMN $^{13}\text{C}$ spectrum

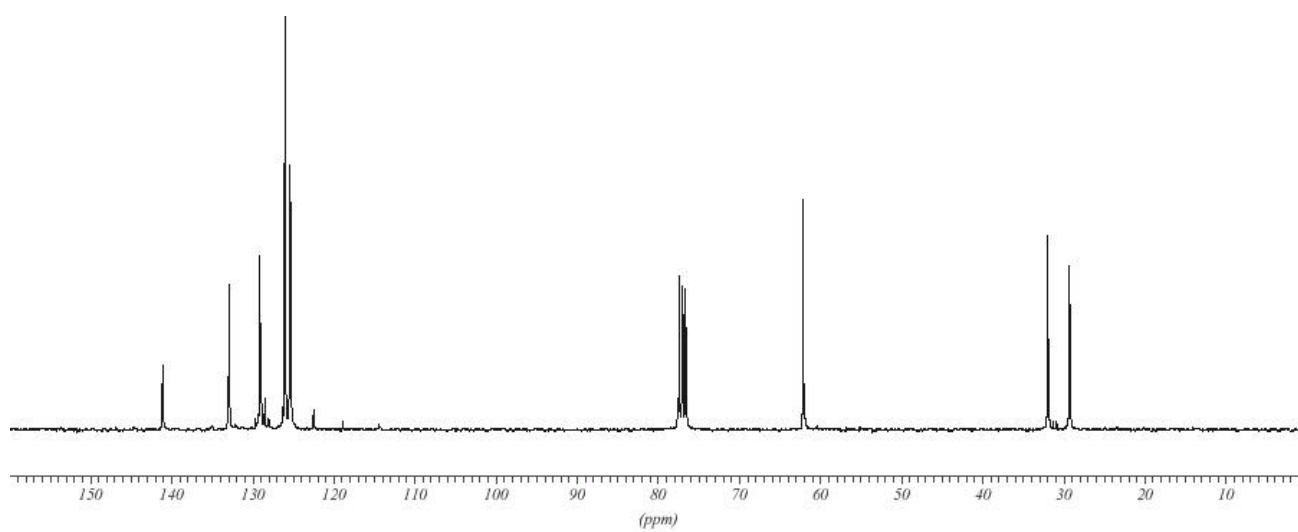

# RMN $^1\text{H}$ spectrum

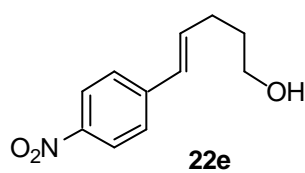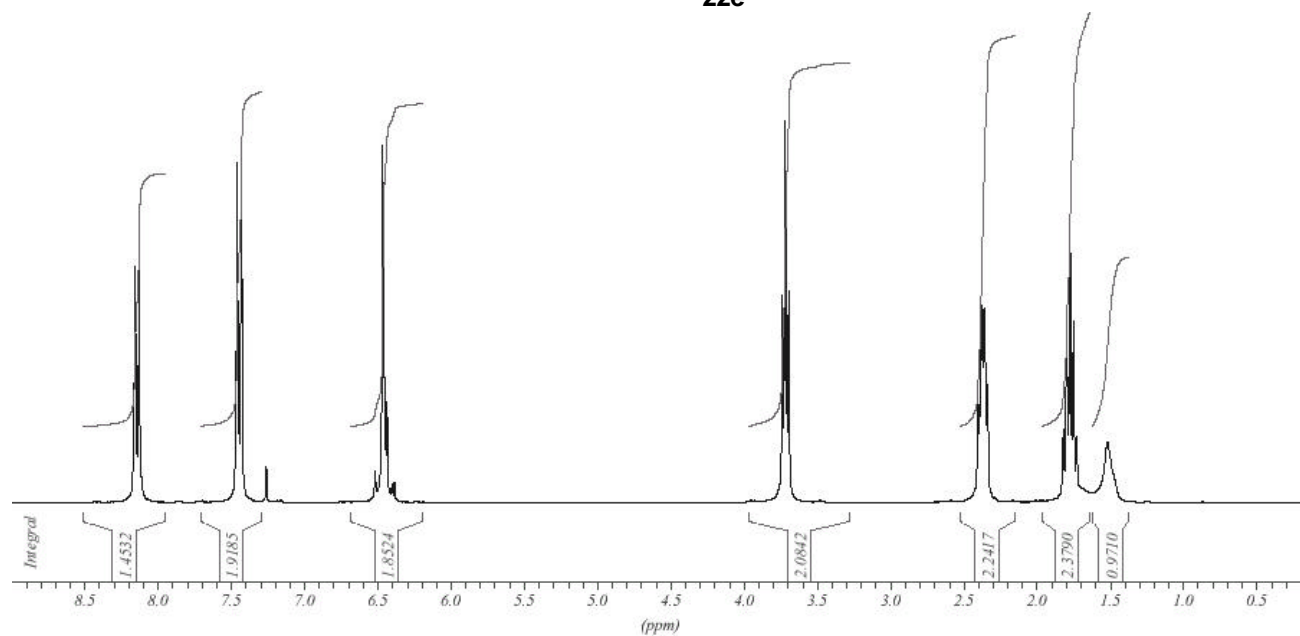

# RMN $^{13}\text{C}$ spectrum

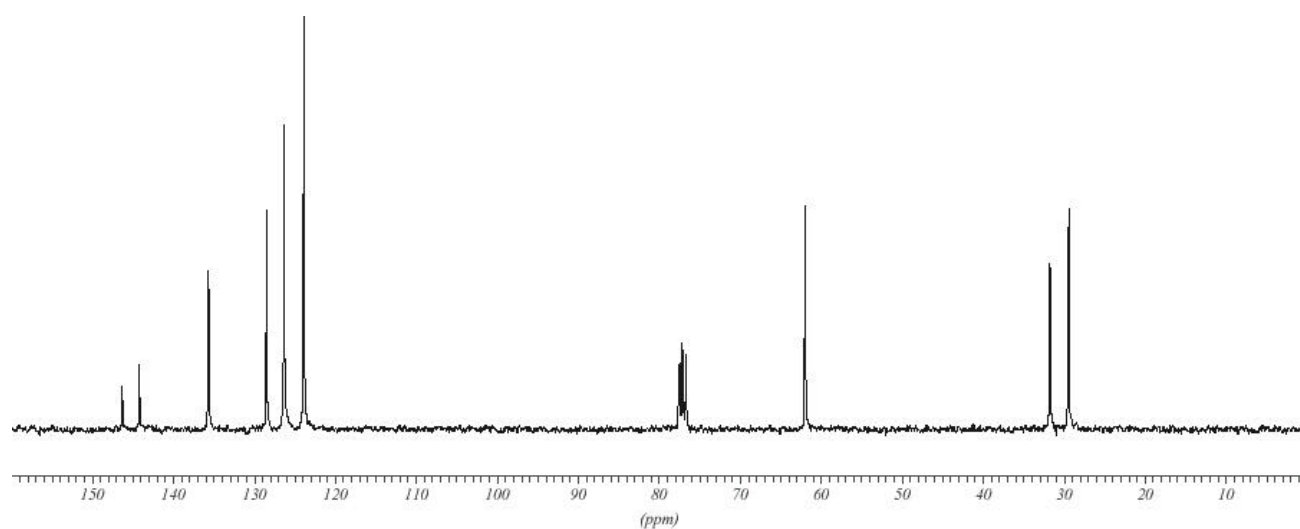

# **RMN $^1\text{H}$ spectrum**

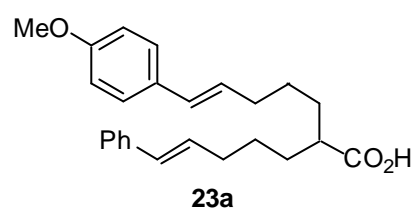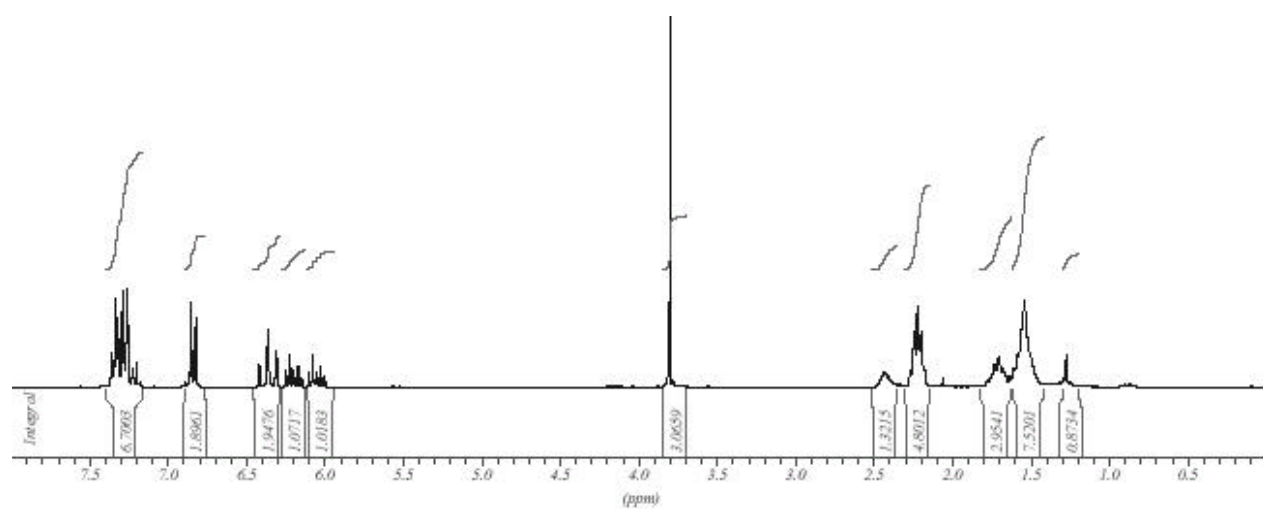

# **RMN $^{13}\text{C}$ spectrum**

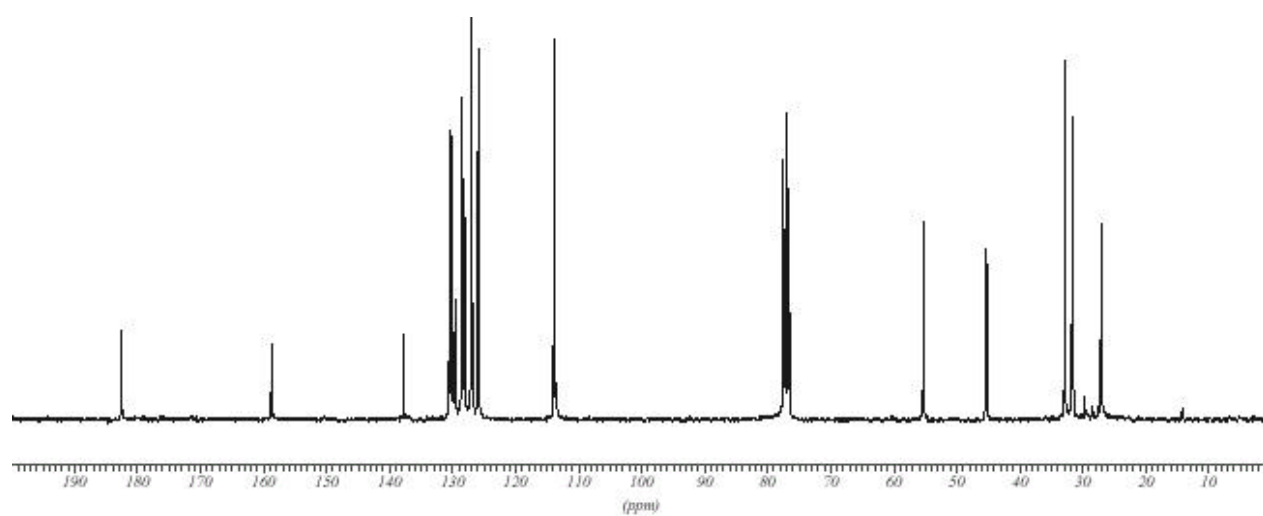

# RMN $^1\text{H}$ spectrum

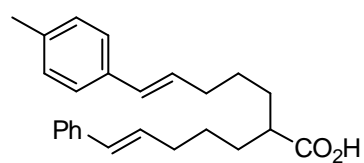

**23b**

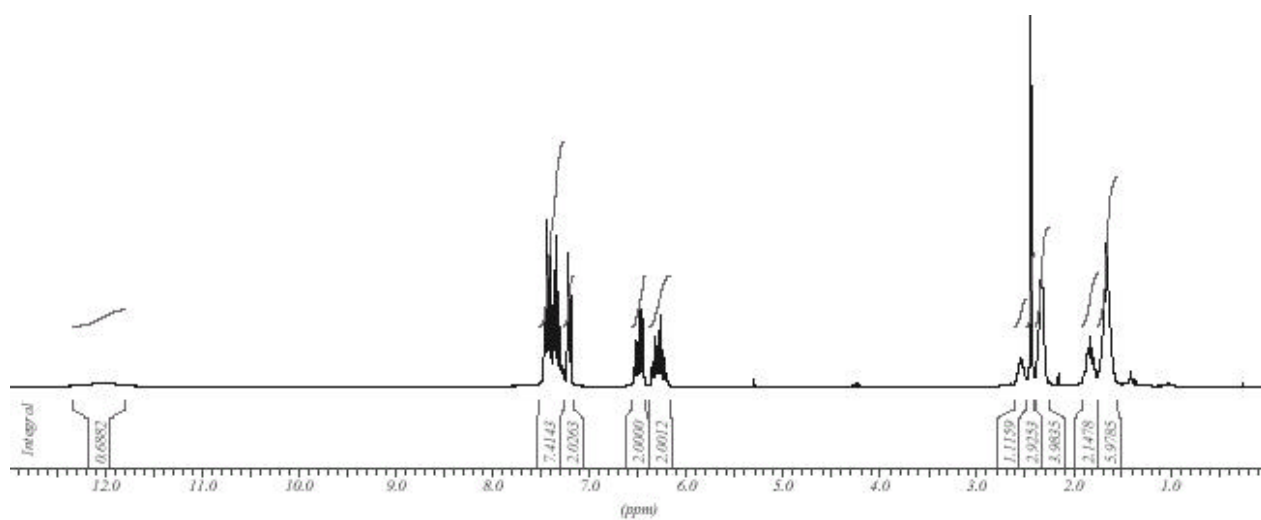

# RMN $^{13}\text{C}$ spectrum

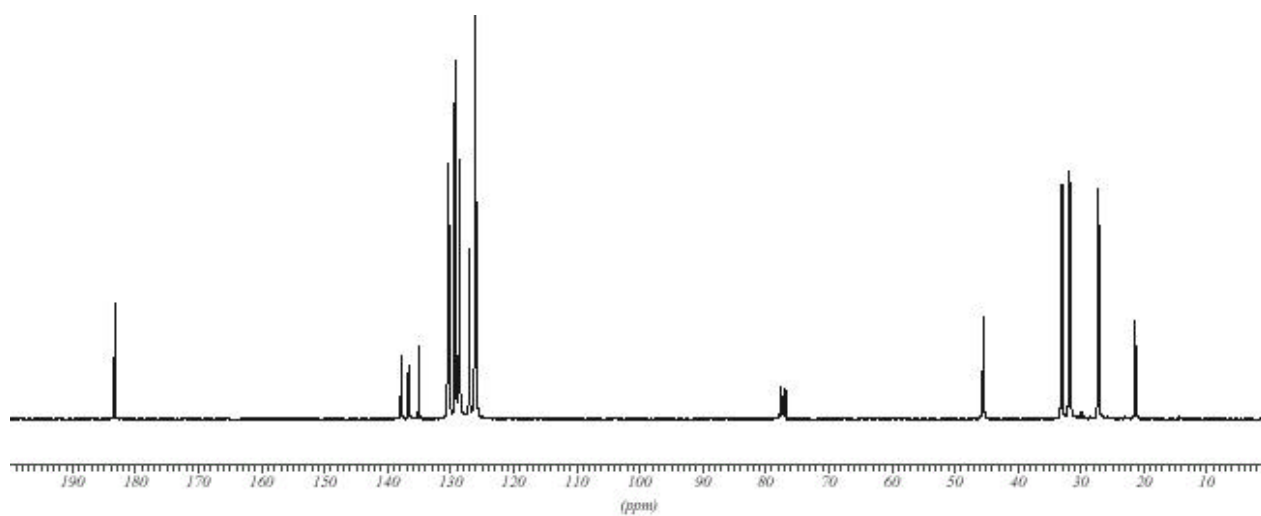



# RMN $^1\text{H}$ spectrum

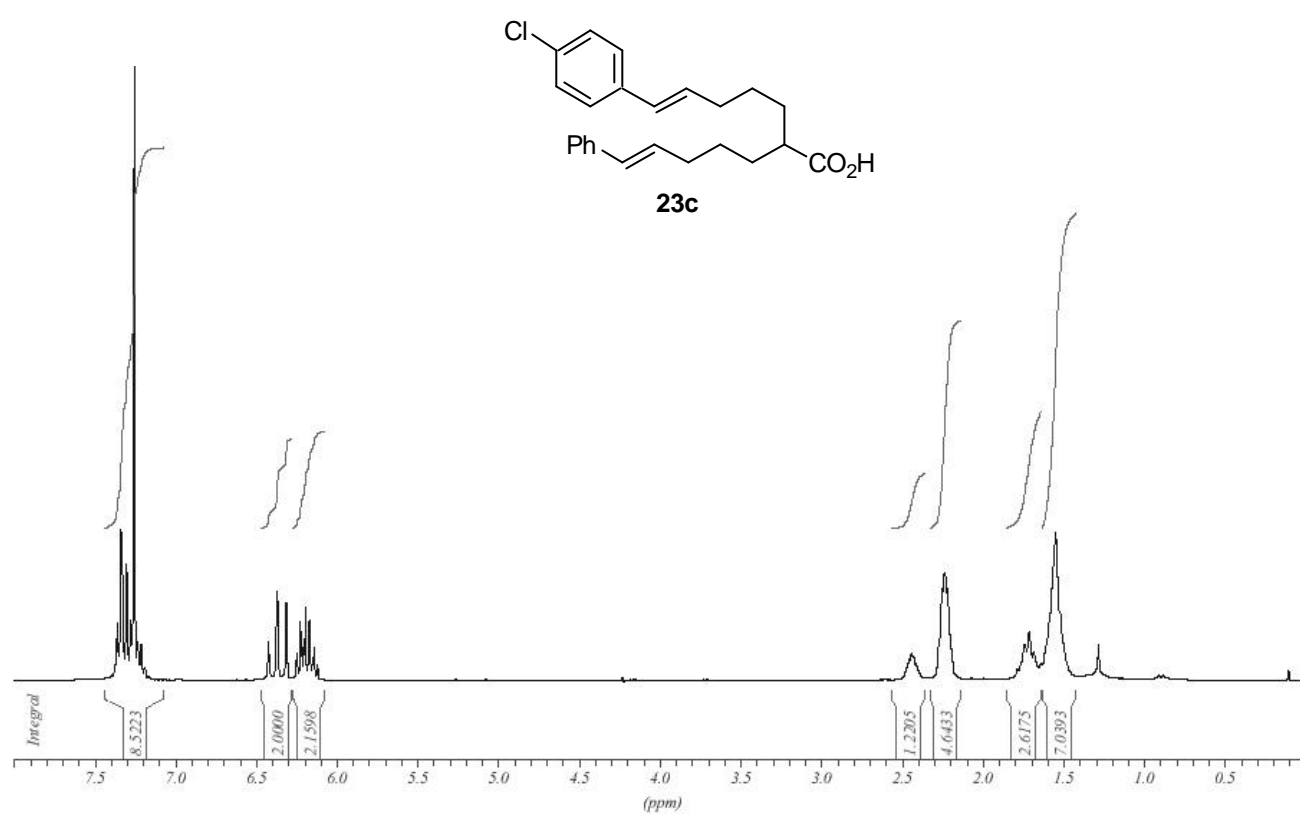

# RMN $^{13}\text{C}$ spectrum

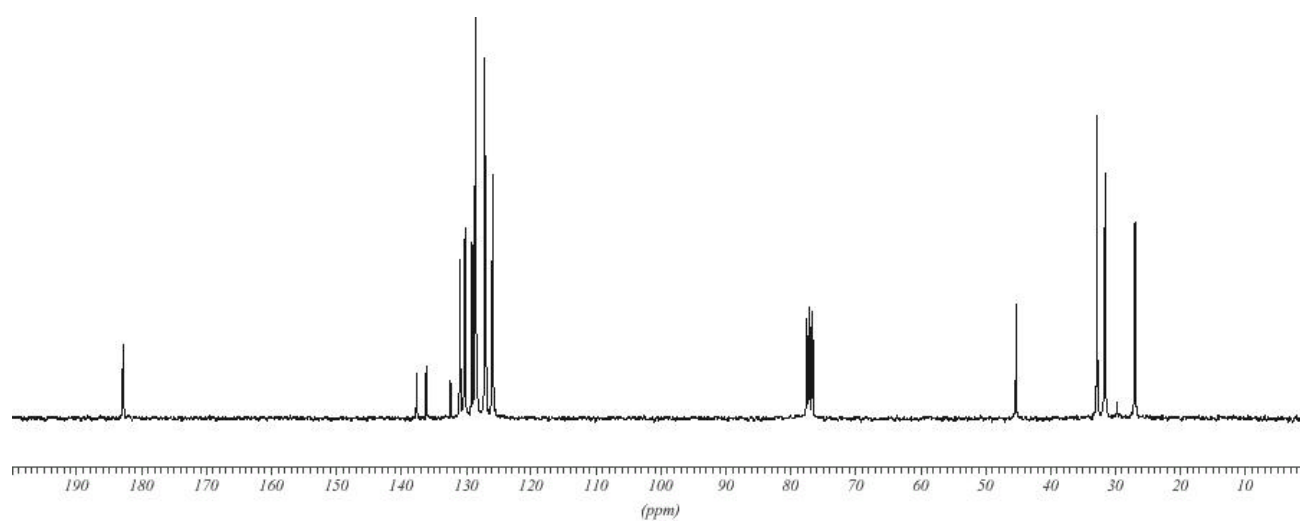

# RMN $^1\text{H}$ spectrum

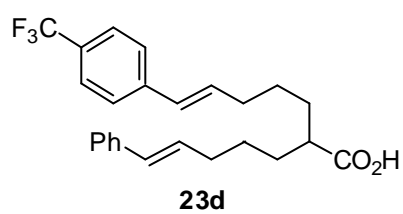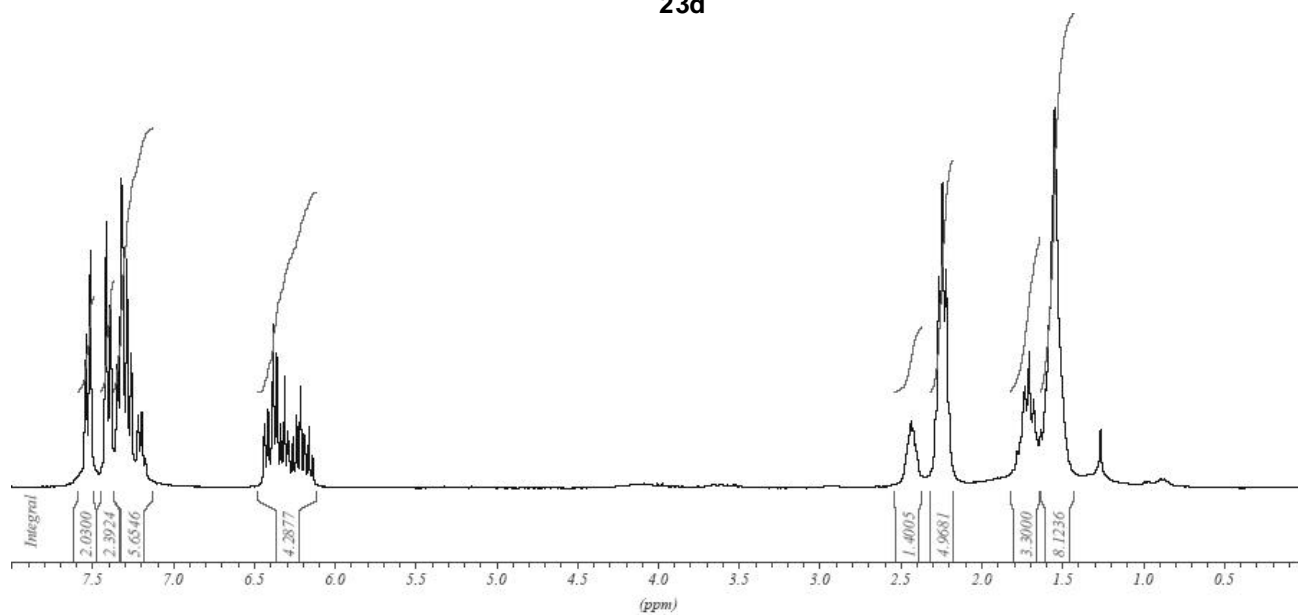

# RMN $^{13}\text{C}$ spectrum

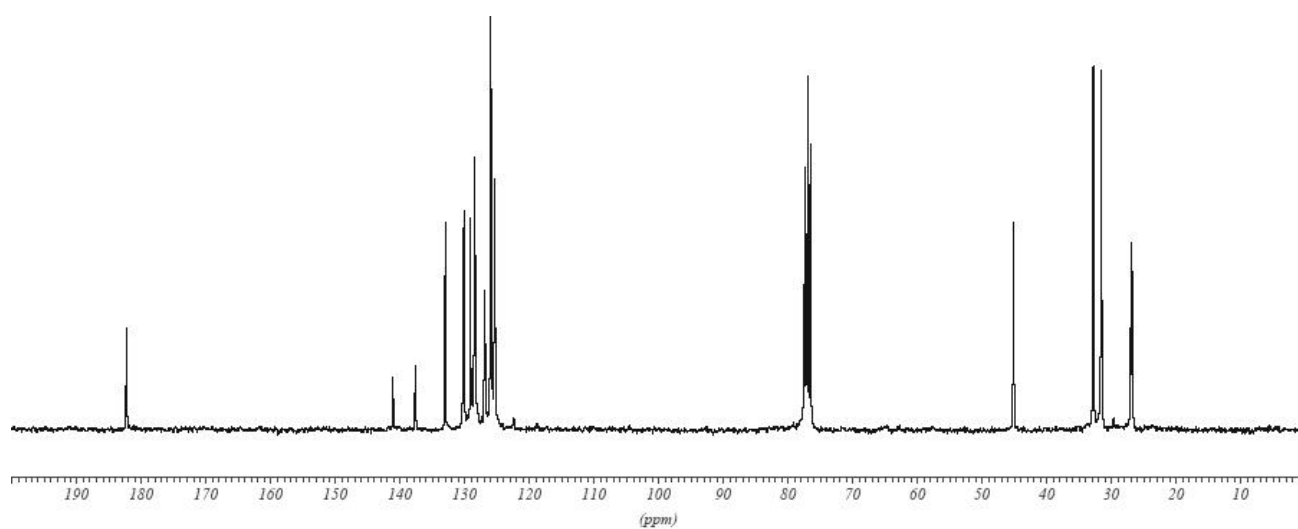

# RMN $^1\text{H}$ spectrum

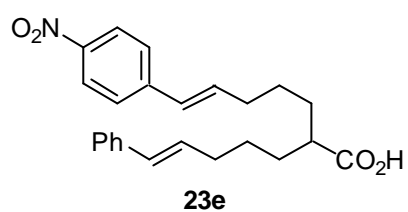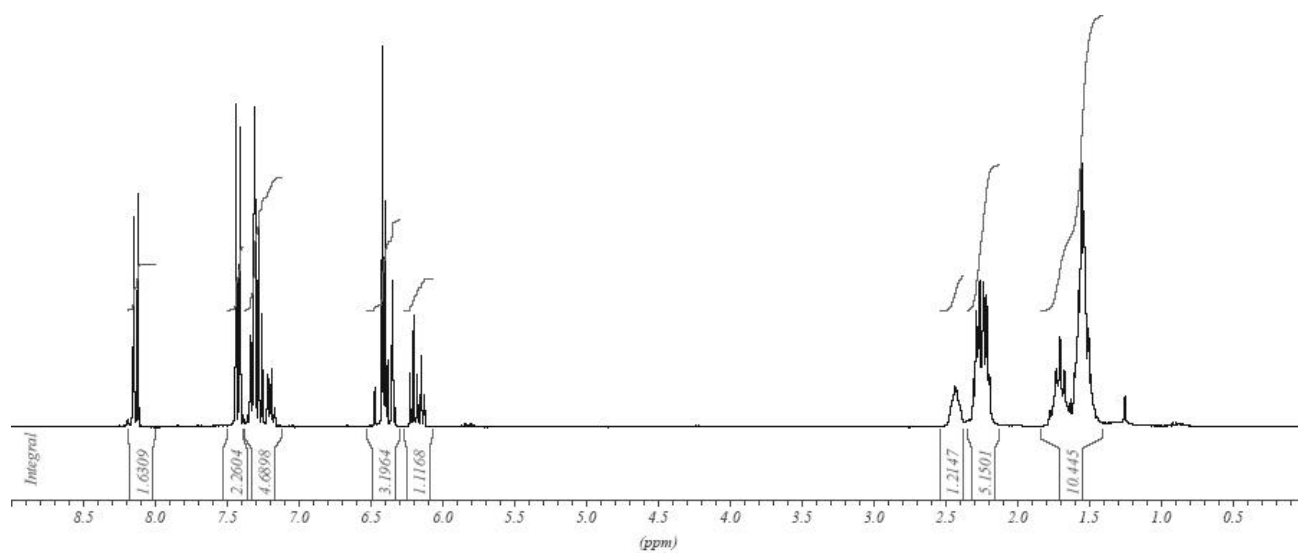

# RMN $^{13}\text{C}$ spectrum

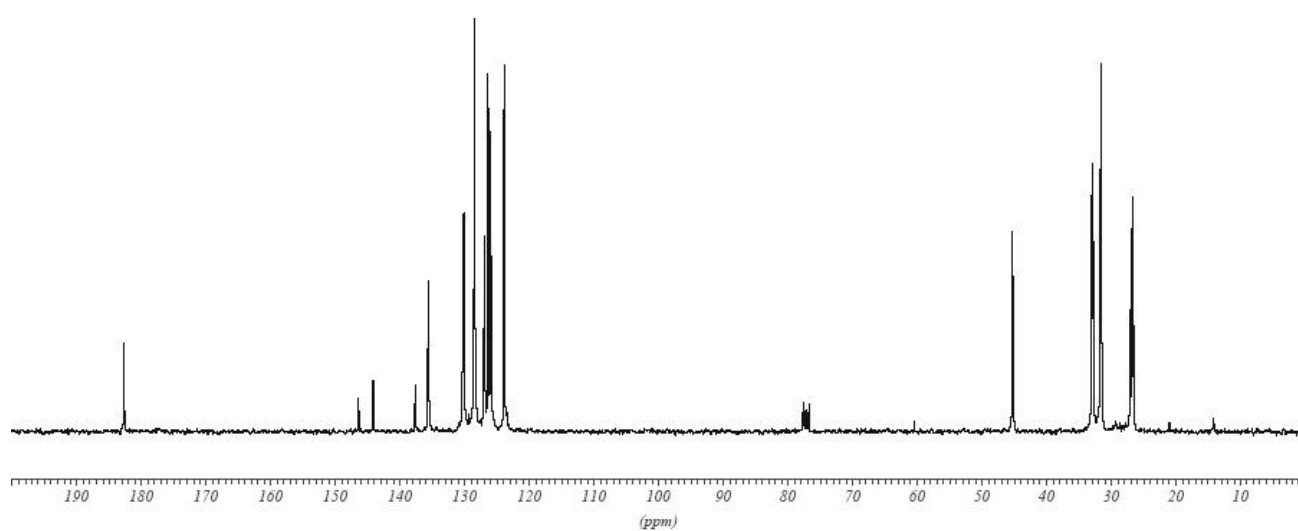

# RMN $^1\text{H}$ spectrum

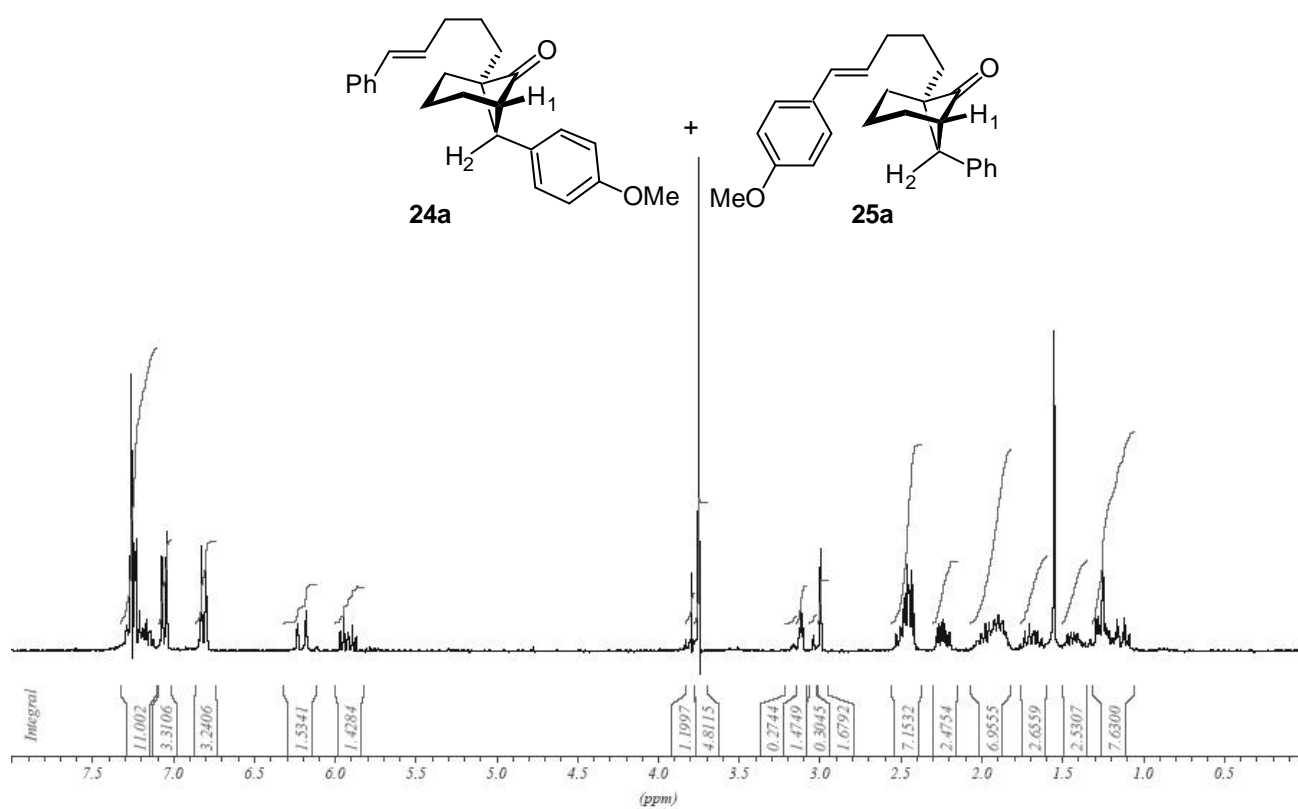

# RMN $^{13}\text{C}$ spectrum

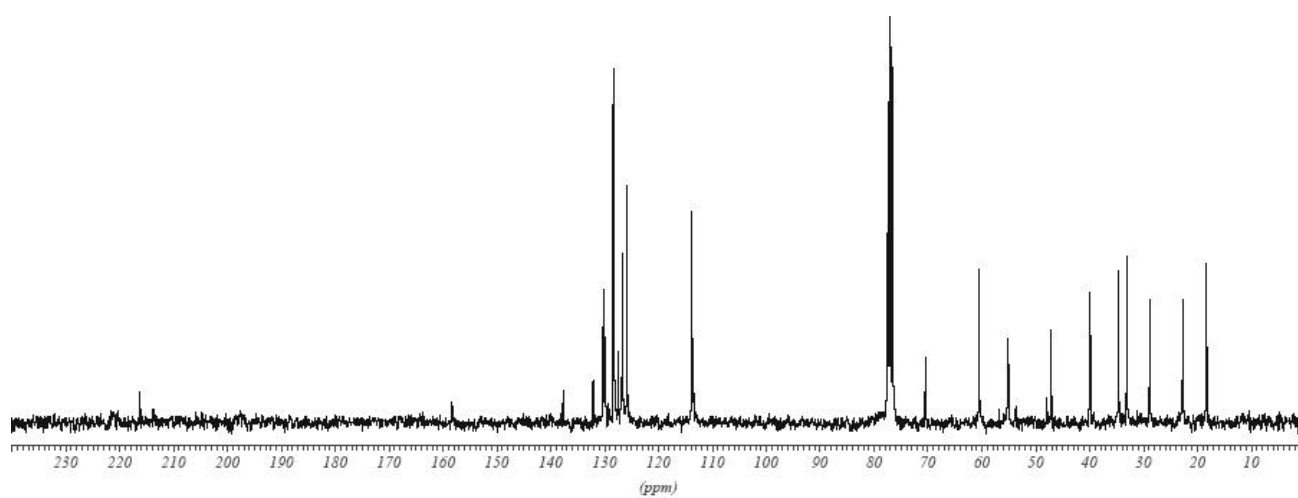

# RMN $^1\text{H}$ spectrum

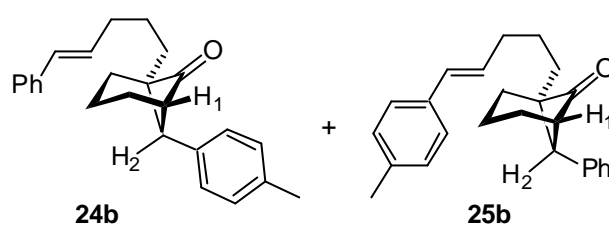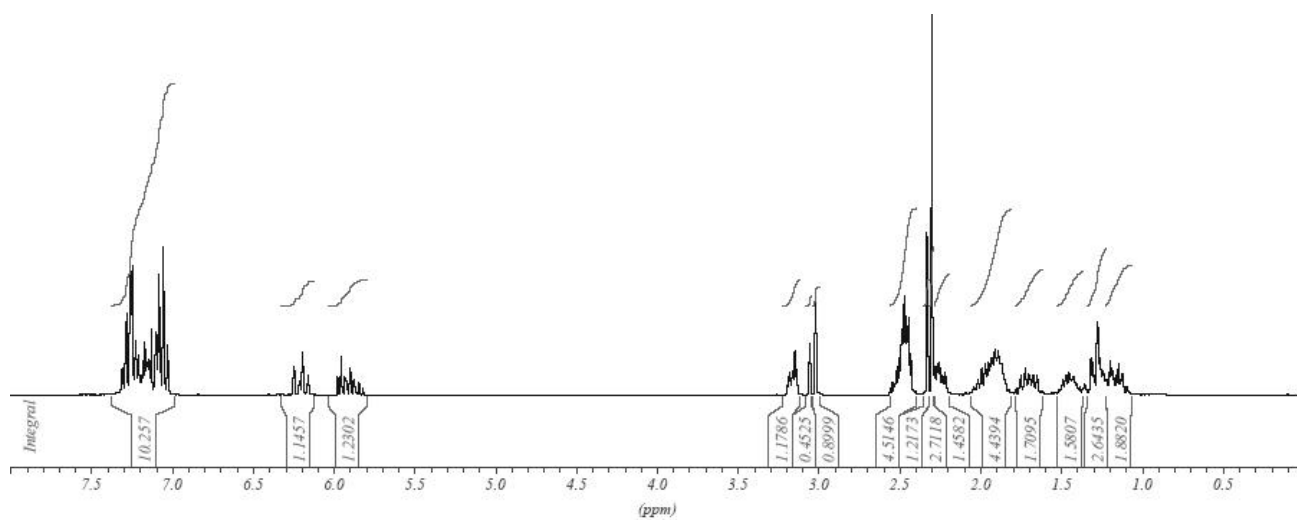

# RMN $^{13}\text{C}$ spectrum

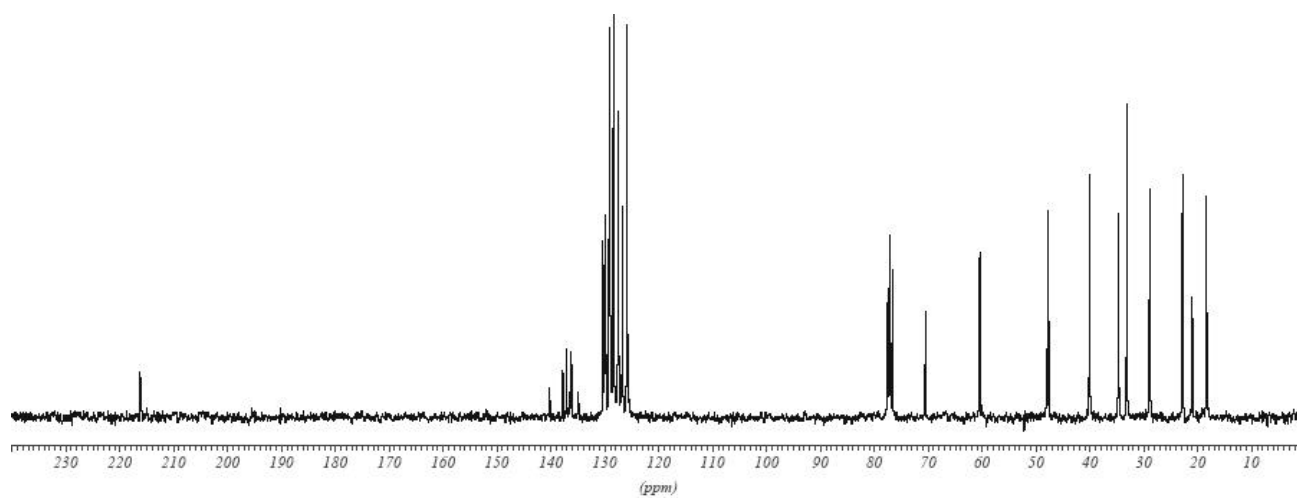

# RMN $^1\text{H}$ spectrum

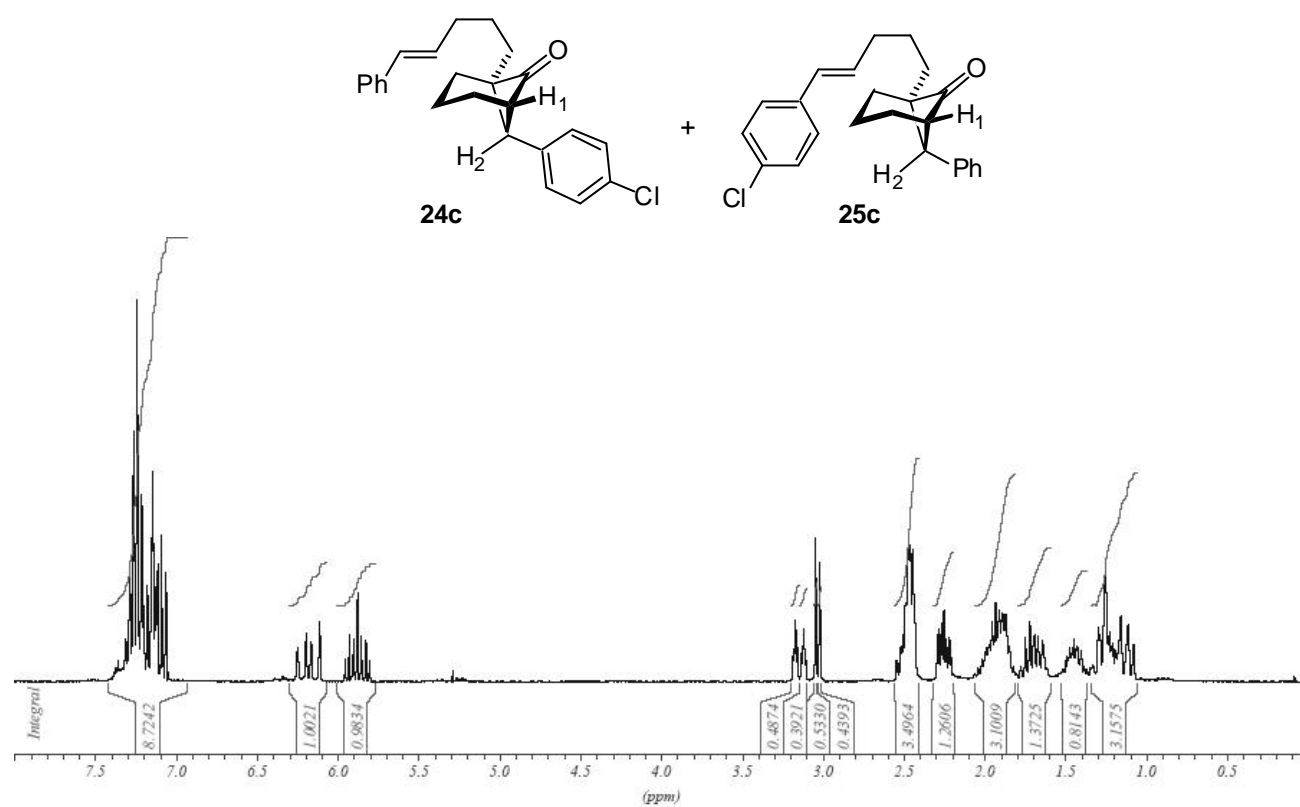

# RMN $^{13}\text{C}$ spectrum

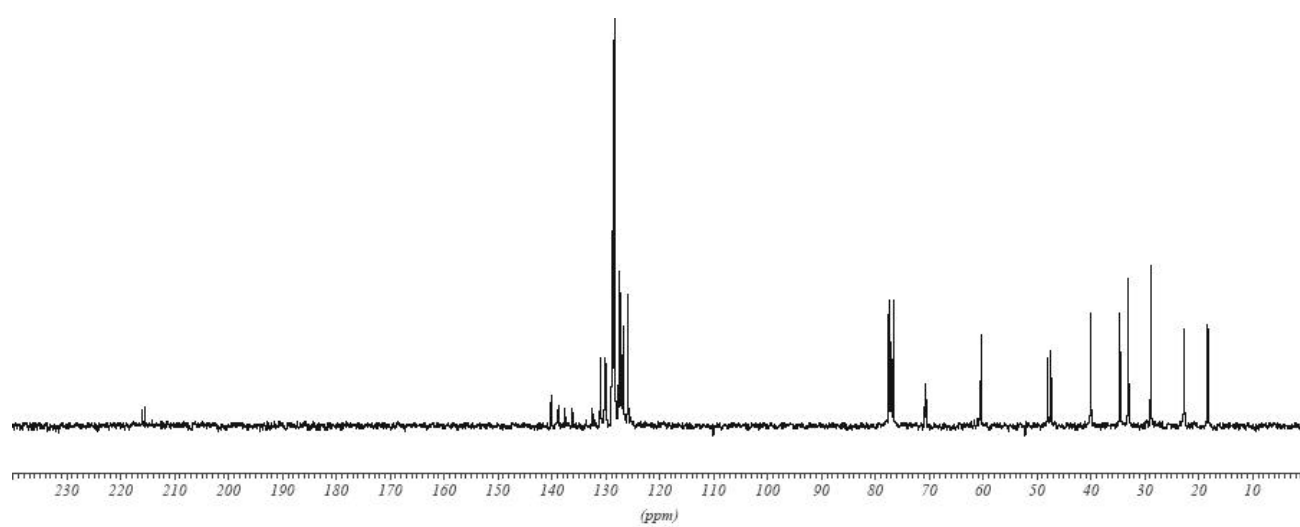

# RMN $^1\text{H}$ spectrum

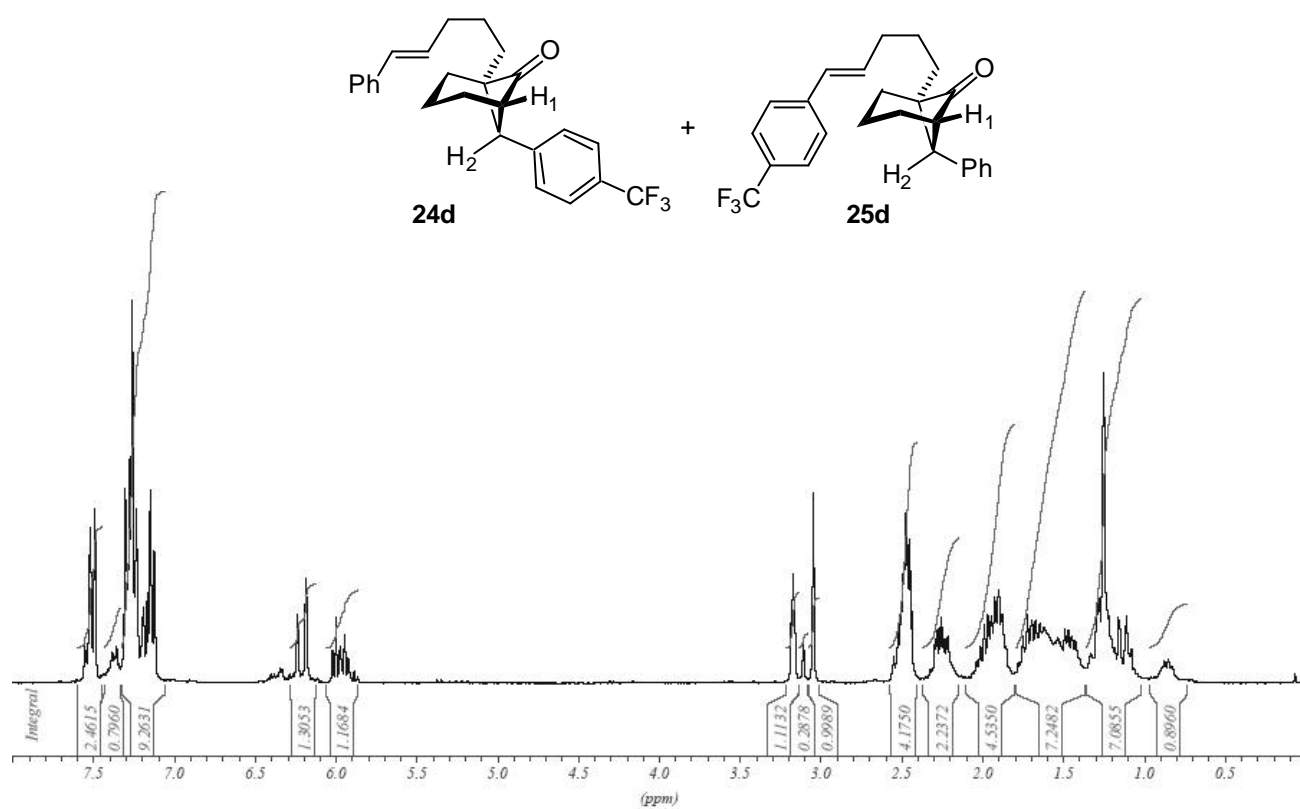

# RMN $^{13}\text{C}$ spectrum

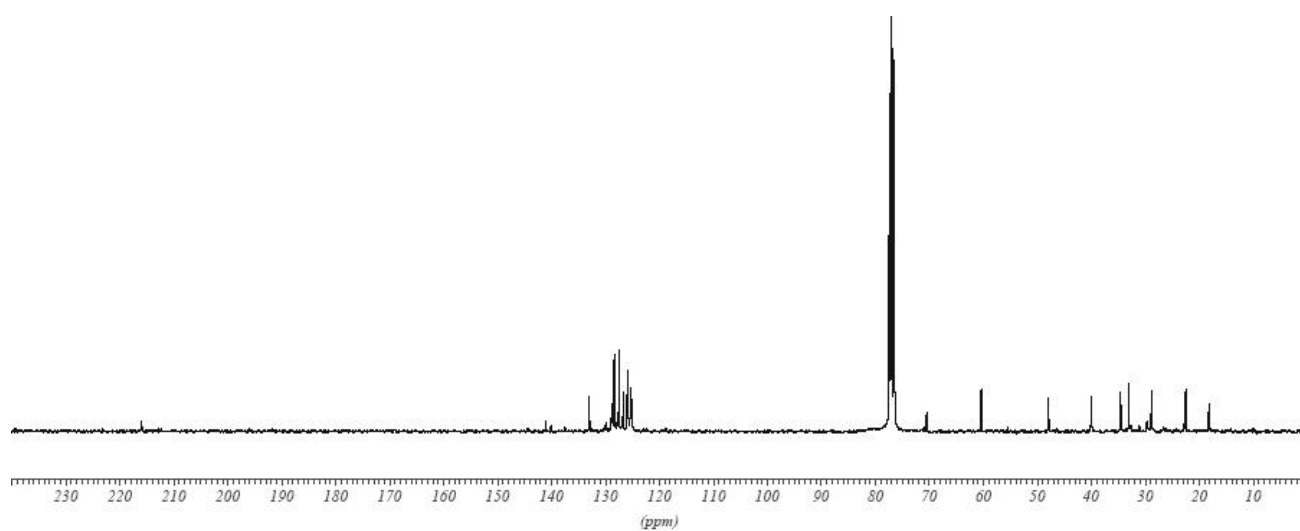

# RMN $^1\text{H}$ spectrum

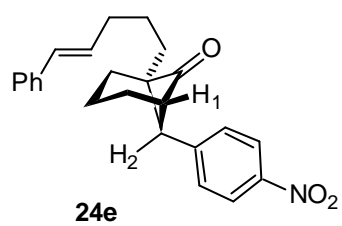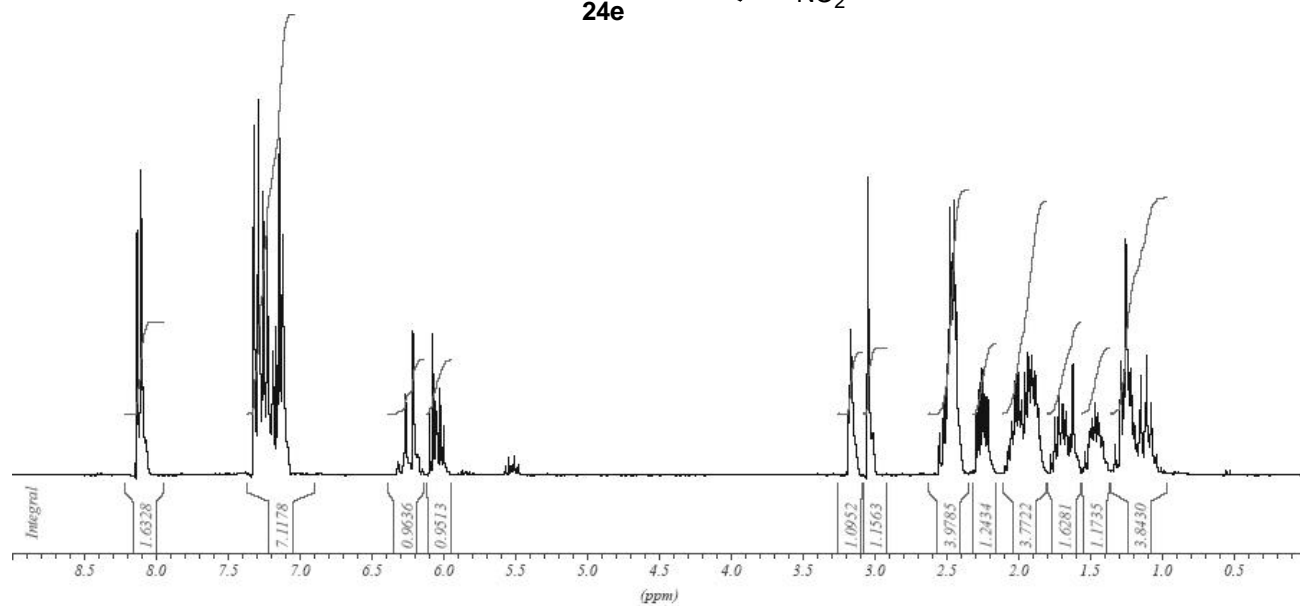



# RMN $^1\text{H}$ spectrum

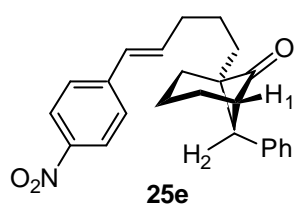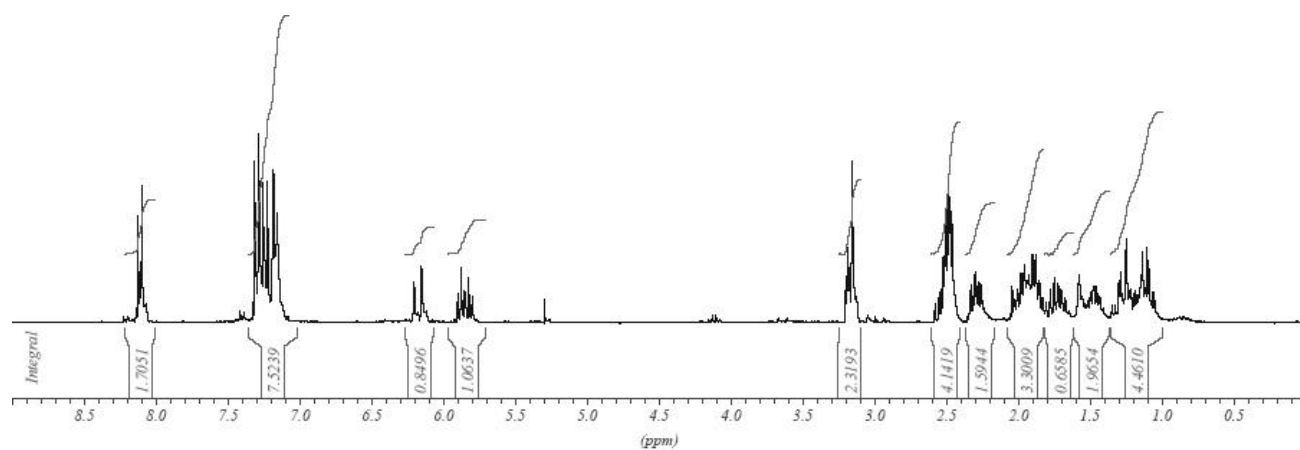

# RMN $^{13}\text{C}$ spectrum

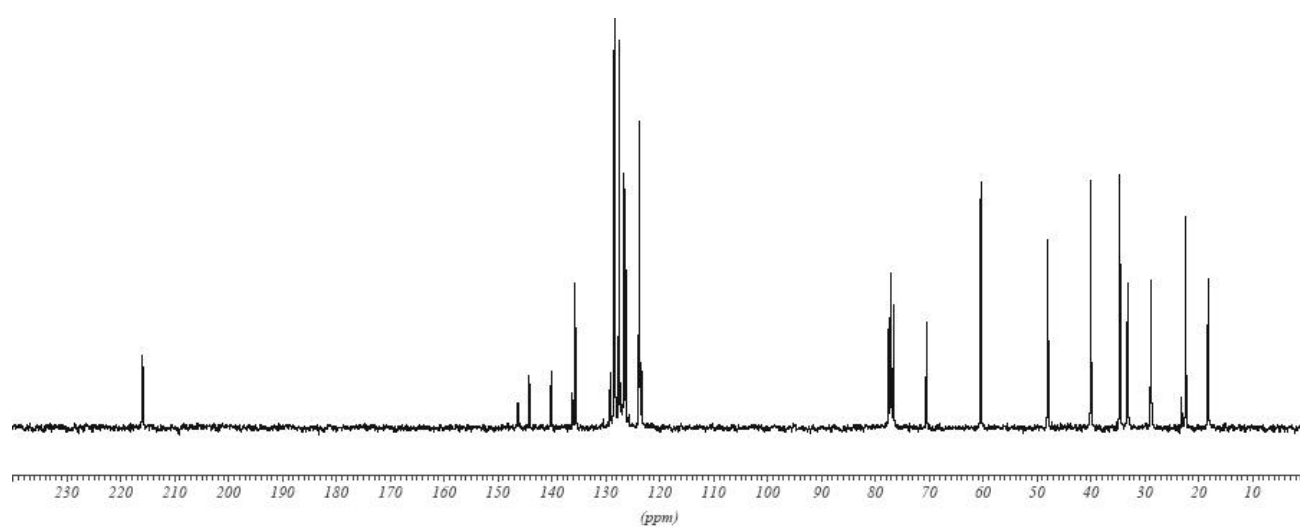

#### IV COSY, NOESY, TOCSY, HSQC and HMBC Spectra of Compound 19.

##### COSY Spectrum of Compound 19.

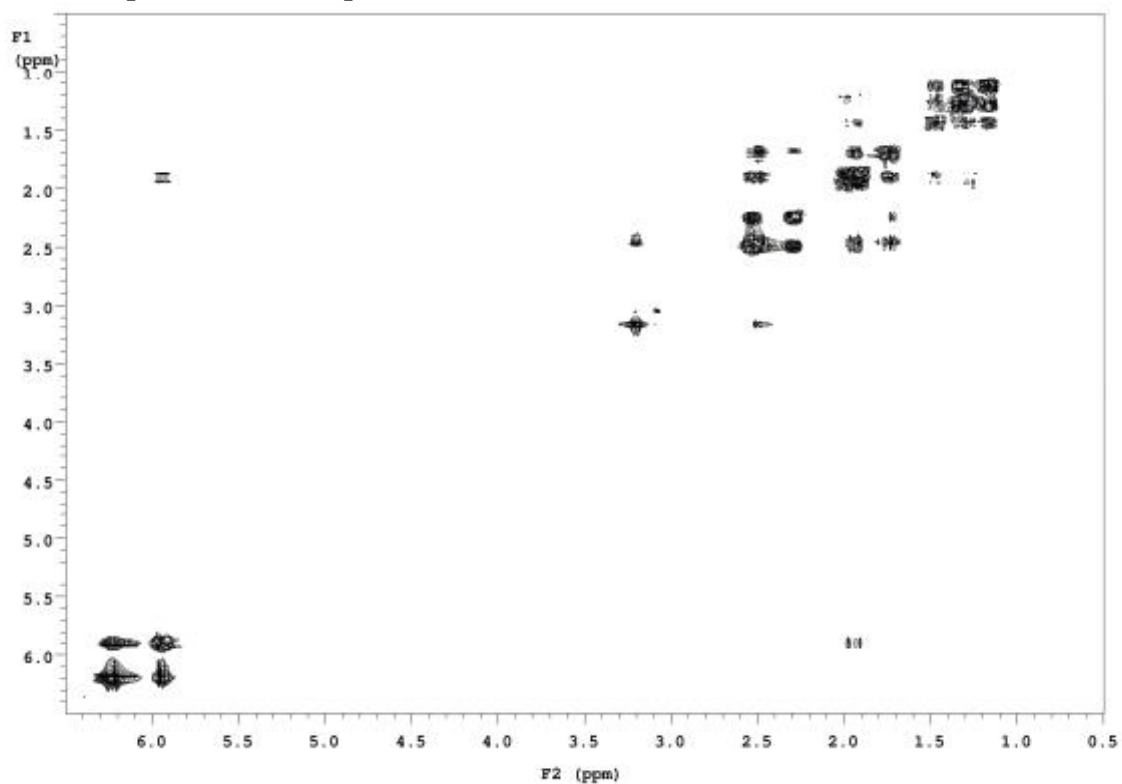

##### NOESY Spectrum of Compound 19.

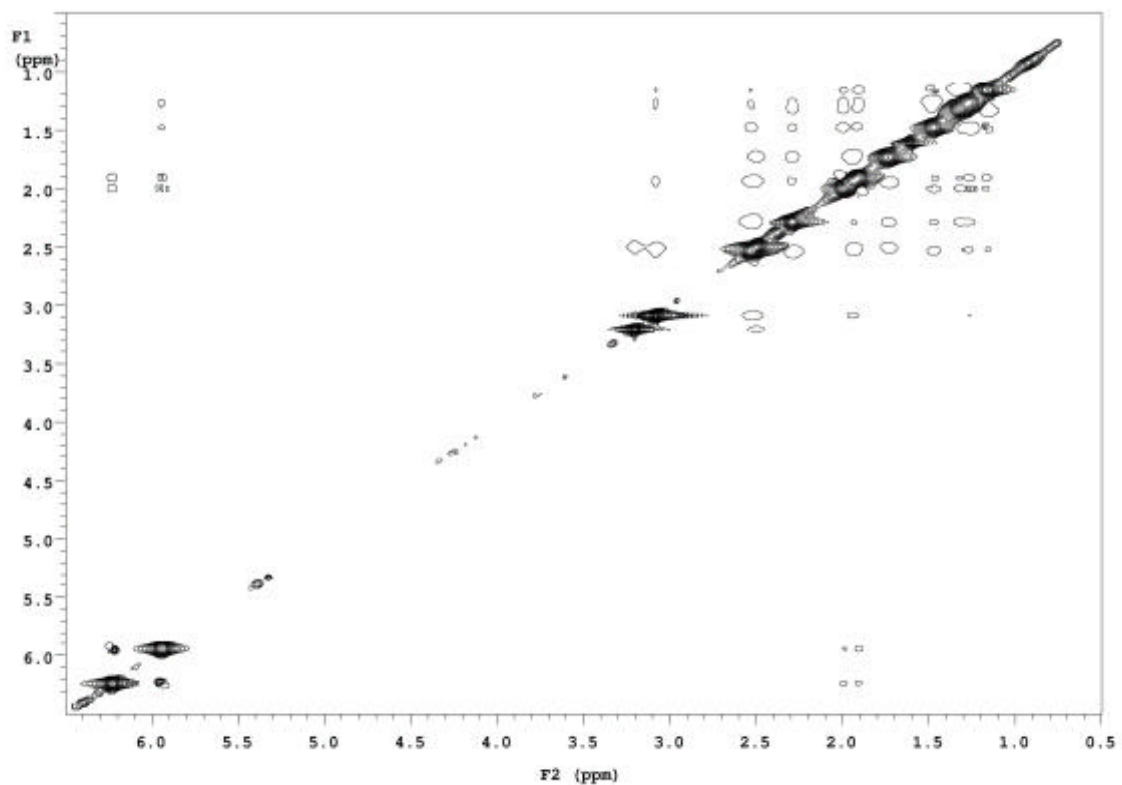

### TOCSY Spectrum of Compound 19.

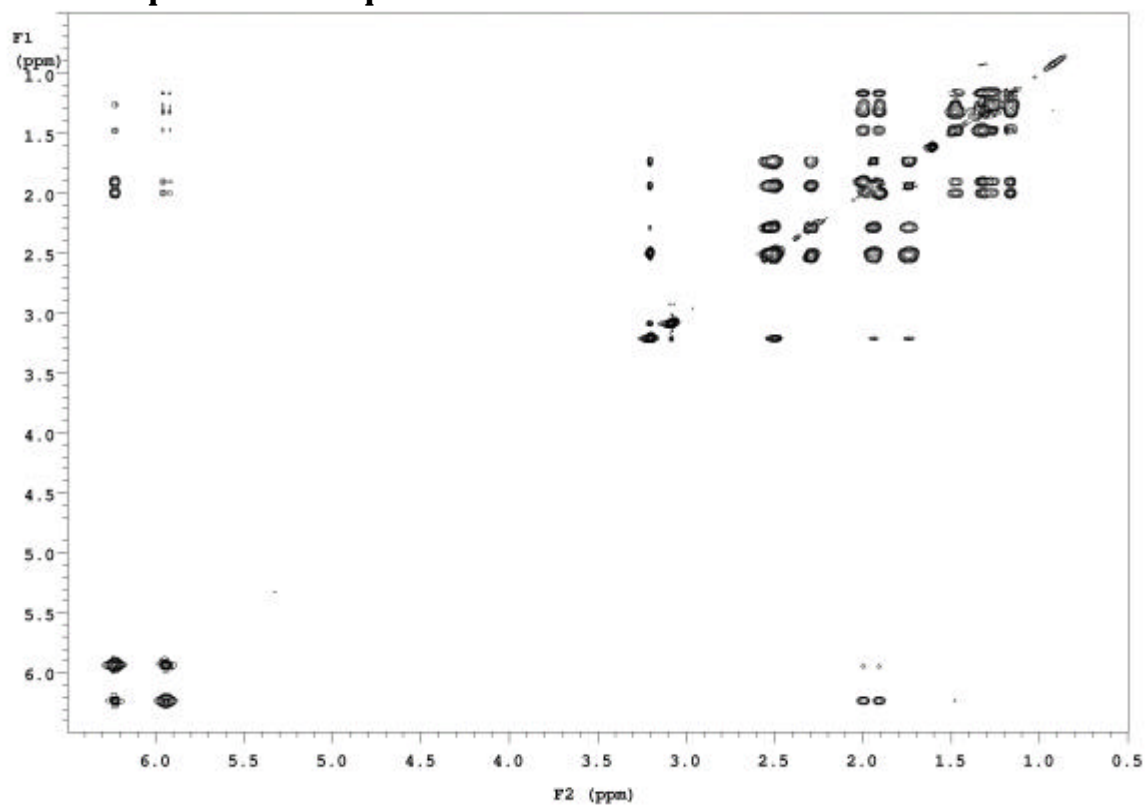

### HSQC Spectrum of Compound 19.

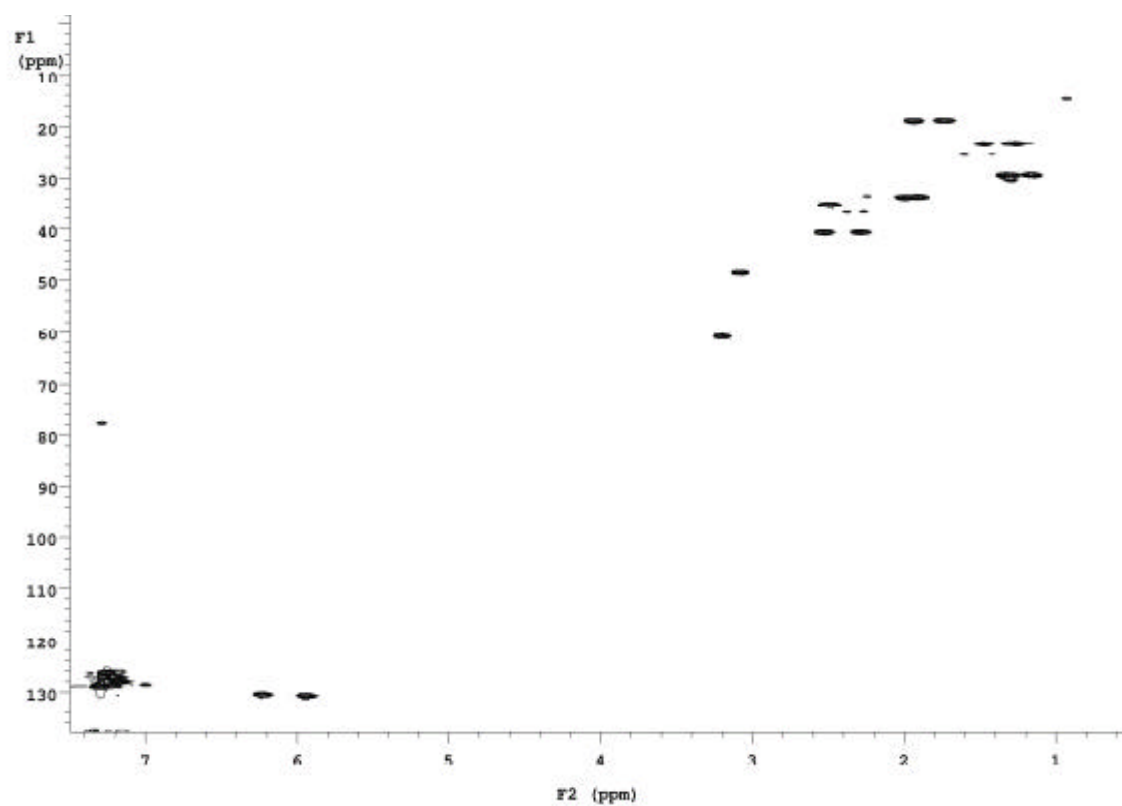

### HMBC Spectrum of Compound 19.

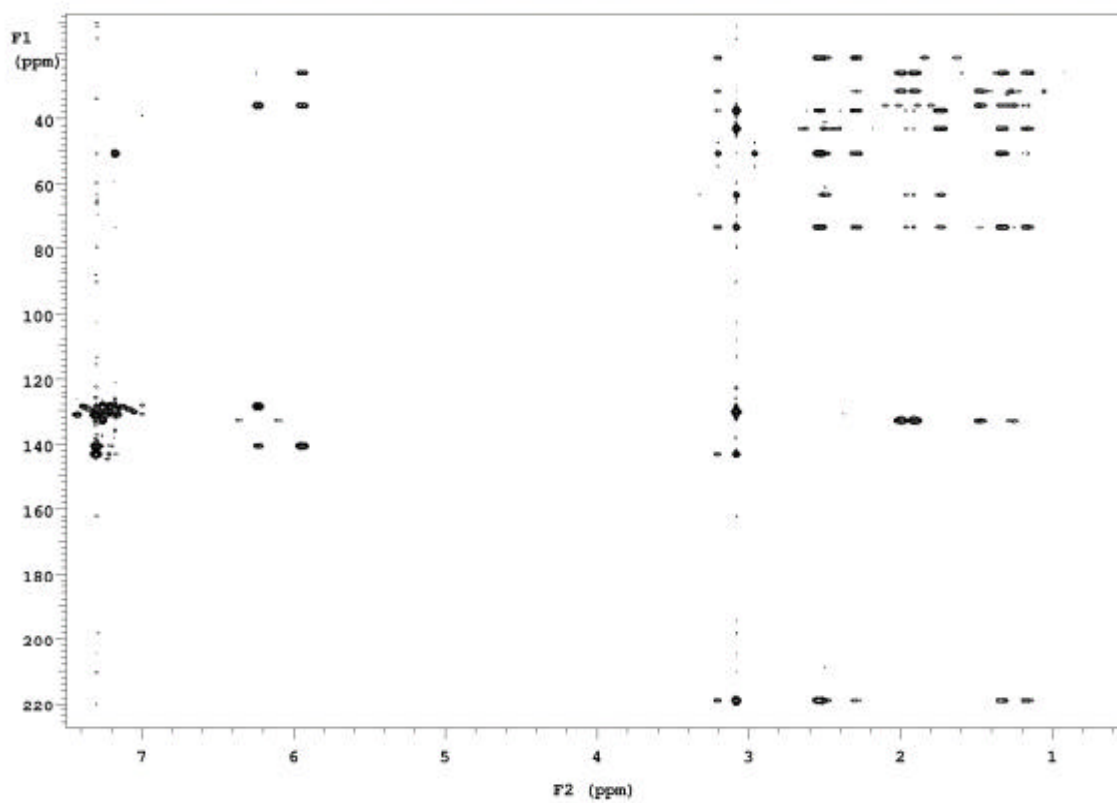

## V Proof of Structure of Compound 19.

### Enlarged Portion of the HMBC Spectrum of Cycloadduct 19 (or 18).

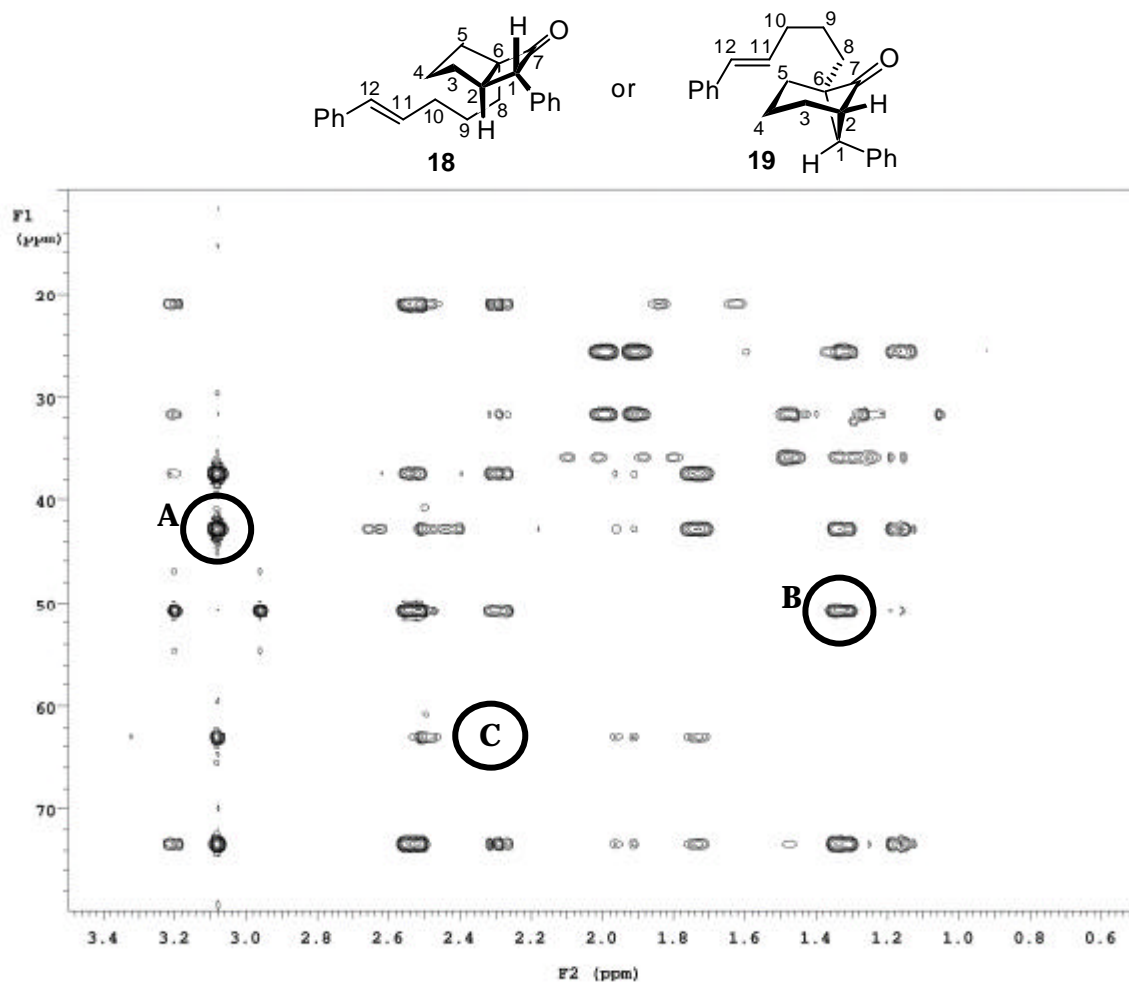

This enlarged portion of the HMBC spectrum of the cycloadduct **19** (or **18**) is depicting three pieces of evidence on the structure of the compound : **(A)** the coupling between the C1 proton (3.04 ppm) and the C5 carbon (40 ppm), **(B)** the coupling between the C8 proton (1.28 ppm) and the C1 carbon (48 ppm) and **(C)** the absence of coupling between the C5 proton (2.25 ppm) and the C2 carbon (61 ppm).<sup>4</sup> This information allowed us to unambiguously assign the structure as being **19**.

**VI Proof of Identity of the Reported Compounds 13,<sup>5</sup> 15,<sup>2b</sup> 21,<sup>6</sup> 22a.<sup>2b</sup>**

**RMN <sup>1</sup>H spectrum**

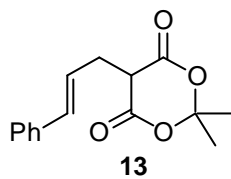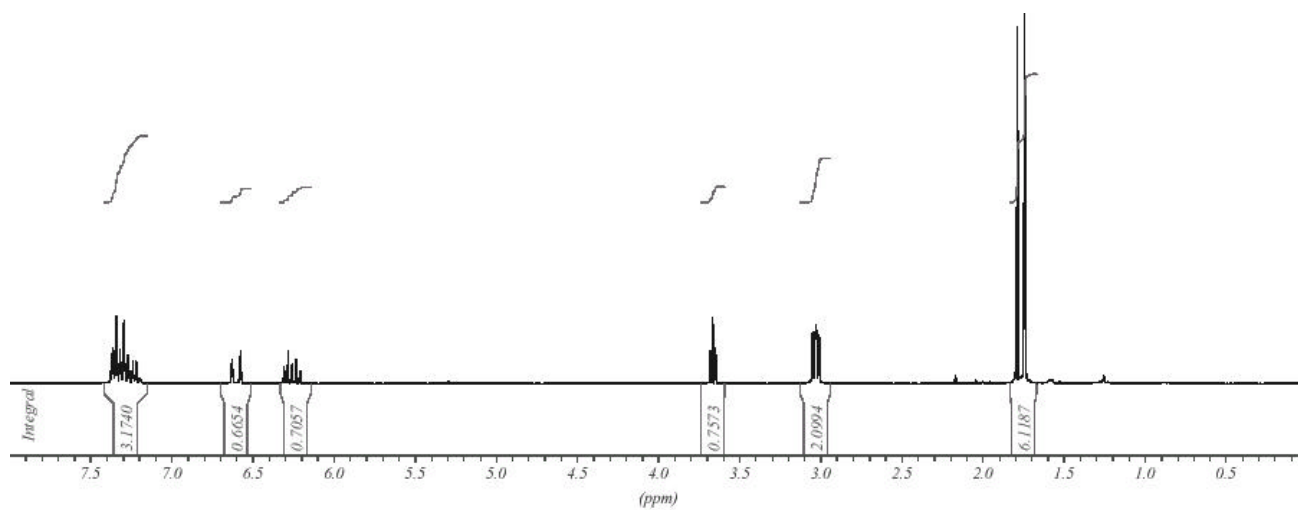

**RMN <sup>1</sup>H spectrum**

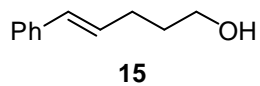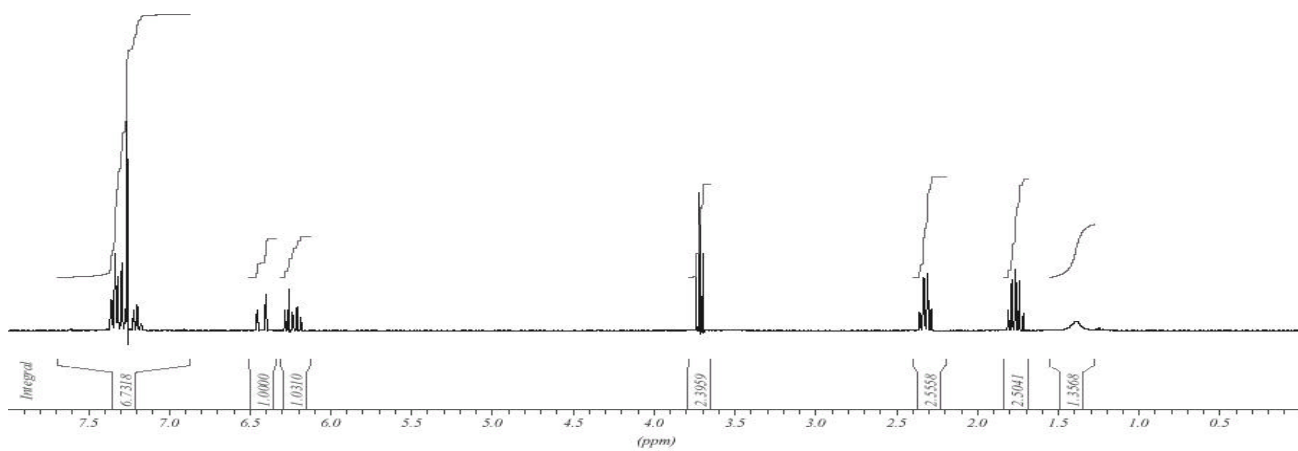

# RMN <sup>1</sup>H spectrum

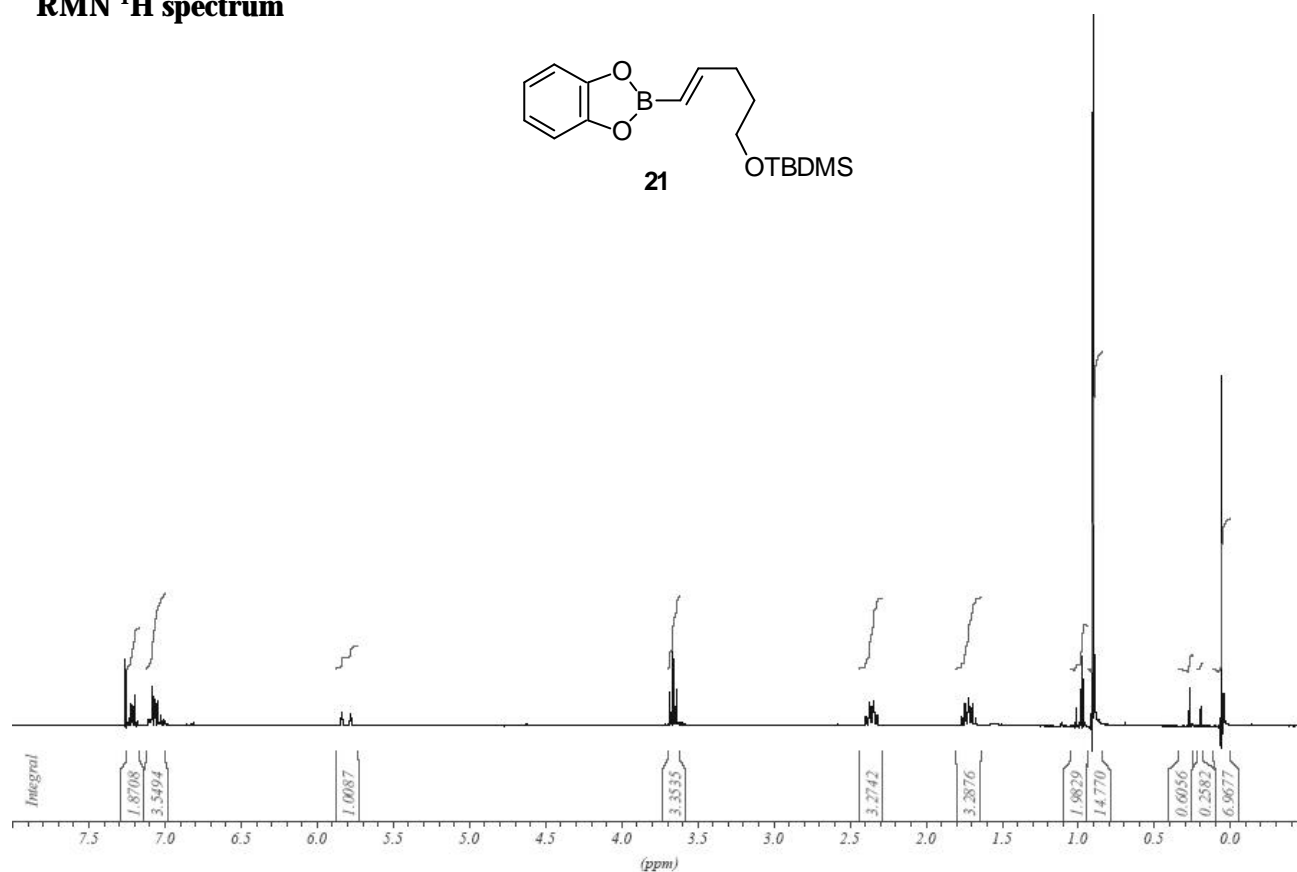

# RMN <sup>1</sup>H spectrum

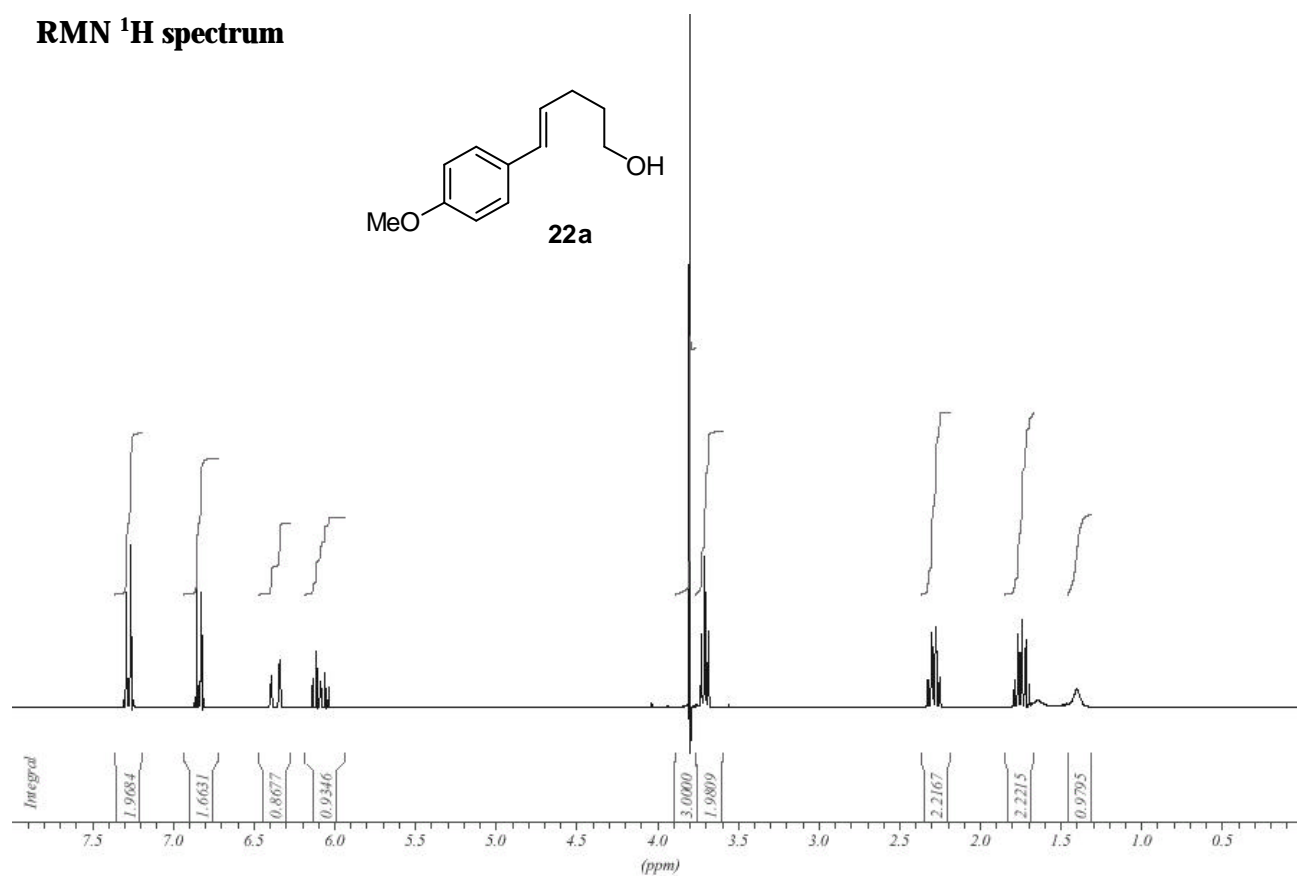

## VII Detailed Calculation for the Determination of the Cycloadducts **24**/**25** Ratios.<sup>7</sup>

Since the ketene formation from **27**, as well as the [2+2]-cycloadditions to give the mixture of **24** and **25** are irreversible, we could write:

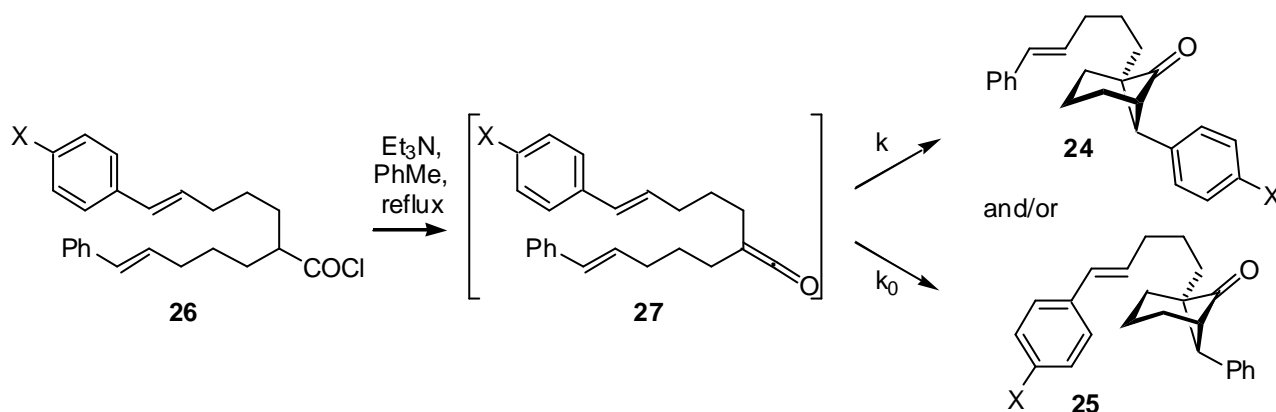

where  $k$  and  $k_0$  are rate constants for ketene cycloaddition with a *p*-substituted styrene and with a non-substituted styrene respectively. The time dependent variation of the concentration of **27** is given by:

$$\frac{d[\mathbf{27}_{(t)}]}{dt} = -k[\mathbf{27}_{(t)}] - k_0[\mathbf{27}_{(t)}] = -(k + k_0)[\mathbf{27}_{(t)}]$$

$$\int_0^t \frac{d[\mathbf{27}_{(t)}]}{[\mathbf{27}_{(t)}]} = -(k + k_0) \int_0^t dt$$

$$\ln[\mathbf{27}_{(t)}] - \ln[\mathbf{27}_{(0)}] = -(k + k_0)t$$

$$[\mathbf{27}_{(t)}] = [\mathbf{27}_{(0)}]e^{-(k + k_0)t}$$

The time dependent variation of the concentration of **24** is given by:

$$\frac{d[\mathbf{24}_{(t)}]}{dt} = k[\mathbf{27}_{(t)}] = k[\mathbf{27}_{(0)}]e^{-(k + k_0)t}$$

$$\int_0^t d[\mathbf{24}_{(t)}] = k[\mathbf{27}_{(0)}] \int_0^t e^{-(k + k_0)t} dt$$

$$[\mathbf{24}_{(t)}] - [\mathbf{24}_{(0)}] = \frac{-k[\mathbf{27}_{(0)}]e^{-(k + k_0)t}}{k + k_0} + \frac{k[\mathbf{27}_{(0)}]e^{-(k + k_0)0}}{k + k_0}$$

Since  $[\mathbf{24}_{(0)}] = 0$ ,

$$[\mathbf{24}_{(t)}] = \frac{k[\mathbf{27}_{(0)}]}{k + k_0} \{1 - e^{-(k + k_0)t}\}$$



The time dependent variation of the concentration of **25** is given by:

$$\frac{d[25_{(t)}]}{dt} = k_0[27_{(0)}] = k_0[27_{(0)}]e^{-(k+k_0)t}$$

$$\int_0^t d[25_{(t)}] = k_0[27_{(0)}] \int_0^t e^{-(k+k_0)t} dt$$

$$[25_{(t)}] - [25_{(0)}] = -\frac{k_0 d[27_{(0)}]e^{-(k+k_0)t}}{k+k_0} + \frac{k_0 d[27_{(0)}]e^{-(k+k_0)0}}{k+k_0}$$

Since  $[25_{(0)}] = 0$ ,

$$[25_{(t)}] = \frac{k_0[27_{(0)}]\{1 - e^{-(k+k_0)t}\}}{k+k_0}$$

The ratio of cycloadducts **24** and **25** is given by:

$$\frac{[24_{(t)}]}{[25_{(t)}]} = \frac{\frac{k[27_{(0)}]\{1 - e^{-(k+k_0)t}\}}{k+k_0}}{\frac{k_0[27_{(0)}]\{1 - e^{-(k+k_0)t}\}}{k+k_0}}$$

$$\frac{[24_{(t)}]}{[25_{(t)}]} = \frac{k}{k_0}$$

---

## References and Footnotes.

<sup>1</sup> A series of <sup>1</sup>H NMR were recorded at different relaxation delay (1 to 7 sec) and we found that a relaxation delay of over 3 sec gave consistent ratios when we integrated the H<sub>1</sub> and H<sub>2</sub> protons of **24/25a-e**.

<sup>2</sup> The characterization is identical to the one reported for the same compound, but prepared through another route. See: a) Kruse, C.G.; Janse, C.V.; Dert, V.; van der Den, A. *J. Org. Chem.* **1979**, *44*, 2916 – 2920. b) Senda, Y.; Kanto, H.; Itoh, H. *J. Chem. Soc., Perkin Trans. 2* **1997**, 1143 – 1146.

<sup>3</sup> The characterization is identical to the one reported for the same compound, but prepared through another route. See: Meyers, A.I.; Durandetta, J.L. *J. Org. Chem.* **1975**, *40*, 2021 – 2025.

---

<sup>4</sup> A correlation spot between the C2 carbon and the proton at 2.45 ppm is seemingly due to the C3 protons rather than to the other C5 proton.

<sup>5</sup> The characterization is identical to the one reported for the same compound, but prepared through another route. See: Prat, M.; Moreno-Mañas, M.; Ribas, J. *Tetrahedron* **1988**, 44, 7205 – 7212.

<sup>6</sup> The characterization is identical to the one reported for the same compound, but prepared through another route. See: Muir, J.C.; Pattenden, G.; Ye, T. *J. Chem. Soc., Perkin Trans. 1* **2002**, 2243 – 2250.

<sup>7</sup> a) Logan, S. *Introduction à la cinétique chimique*, Dunod, Paris, 1998, pp. 47 – 50. b) Schaal, R. *Chemical Kinetics of Homogeneous Systems*, D. Riedel Publishing Company, Dordrecht, 1974, pp. 30 – 32.
